# Supplementary material for: Local injections of β-NGF accelerates endochondral fracture repair by promoting cartilage to bone conversion
Source: PubMed Central journal article supplement (PMC7747641; doi:10.1038/s41598-020-78983-y), 2020-12-17
Supplement: 41598_2020_78983_MOESM1_ESM.pdf [file 41598_2020_78983_MOESM1_ESM.pdf]

## Supplemental Materials

### Local injections of $\beta$ -NGF accelerates endochondral fracture repair by promoting cartilage to bone conversion

Kevin O. Rivera<sup>1,2,3</sup>, Fabrizio Russo<sup>4</sup>, Ryan M. Boileau<sup>5,6</sup>, Ryan Tomlinson<sup>7</sup>, Theodore Miclau<sup>2</sup>, Ralph S. Marcucio<sup>1,2</sup>, Tejal A. Desai<sup>1,3</sup>, Chelsea S. Bahney<sup>1,2,8</sup>

<sup>1</sup>Graduate Program in Oral and Craniofacial Sciences, School of Dentistry, University of California, San Francisco (UCSF), San Francisco, CA, USA

<sup>2</sup>Department of Orthopaedic Surgery, Orthopaedic Trauma Institute, University of California, San Francisco (UCSF), San Francisco, CA, USA

<sup>3</sup>Department of Bioengineering and Therapeutic Sciences, University of California, San Francisco (UCSF), San Francisco, CA, USA

<sup>4</sup>Department of Orthopaedics and Trauma Surgery, University Campus Bio-Medico, Rome, Italy

<sup>5</sup>The Eli and Edythe Broad Center of Regeneration Medicine and Stem Cell Research, Center for Reproductive Sciences, University of California, San Francisco (UCSF), San Francisco, CA, USA

<sup>6</sup>Department of Urology, University of California, San Francisco (UCSF), San Francisco, CA, USA

<sup>7</sup>Department of Orthopaedic Surgery, Thomas Jefferson University, Philadelphia, PA, USA

<sup>8</sup>The Steadman Philippon Research Institute (SPRI), Vail, CO, USA

Address for correspondence:

Chelsea S. Bahney

The Steadman Philippon Research Institute (SPRI)

181 W Meadows Drive, Suite 1000

Vail CO 81657

[cbahney@sprivail.org](mailto:cbahney@sprivail.org) or [Chelsea.Bahney@UCSF.edu](mailto:Chelsea.Bahney@UCSF.edu)

**Supplemental Table 1. Expression levels of genes of interest from  $\beta$ -NGF vs non-stimulated cartilage explants, generated by RNA sequencing**

| Gene Symbol | Log2 Fold Change – $\beta$ -NGF vs Control | Log2FC Standard Error | P value  | P adj    | Ensembl Gene ID    |
|-------------|--------------------------------------------|-----------------------|----------|----------|--------------------|
| Bglap (Oc)  | 1.66086954                                 | 0.16275               | 1.88E-24 | 6.34E-22 | ENSMUSG00000074483 |
| Bmp2        | 0.70113423                                 | 0.35781               | 5.00E-02 | 1.39E-01 | ENSMUSG00000027358 |
| Col1a1      | 0.9261786                                  | 0.11038               | 4.82E-17 | 6.55E-15 | ENSMUSG00000001506 |
| Csgalnact1  | -0.7924748                                 | 0.26449               | 2.73E-03 | 1.47E-02 | ENSMUSG00000036356 |
| Csgalnact2  | -1.019172                                  | 0.22075               | 3.90E-06 | 6.54E-05 | ENSMUSG00000042042 |
| Runx2       | 0.73622873                                 | 0.25738               | 4.23E-03 | 2.09E-02 | ENSMUSG00000039153 |
| Sox9        | 0.03472161                                 | 0.12185               | 7.76E-01 | 8.73E-01 | ENSMUSG00000000567 |
| Spp1 (Op)   | -0.8230715                                 | 0.14671               | 2.02E-08 | 6.56E-07 | ENSMUSG00000029304 |
| Tgfb1       | 0.96324622                                 | 0.12627               | 2.38E-14 | 2.32E-12 | ENSMUSG00000002603 |
| Vegfa       | 0.19972043                                 | 0.16362               | 2.22E-01 | 3.97E-01 | ENSMUSG00000023951 |

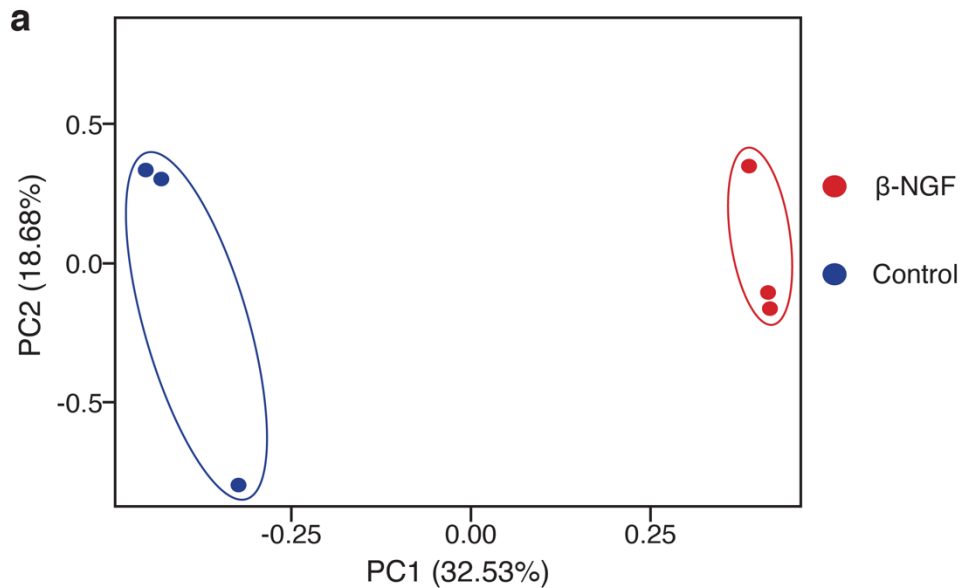

**b**

Gene ontology - downregulated molecular functions

|                                                        | p value | adj. p value | odds ratio |
|--------------------------------------------------------|---------|--------------|------------|
| RNA binding (GO: 003723)                               | 1.2E-87 | 1.4E-84      | 3.04       |
| mRNA binding (GO: 003729)                              | 1.7E-15 | 9.7E-13      | 3.44       |
| Cadherin binding (GO: 0045296)                         | 3.5E-14 | 1.3E-11      | 2.66       |
| Translation initiation factor activity (GO: 0003743)   | 4.2E-13 | 1.2E-10      | 6.70       |
| Translation factor activity, RNA binding (GO: 0008135) | 4.2E-11 | 9.7E-09      | 4.50       |
| Ubiquitin protein ligase binding (GO: 0031625)         | 6.4E-09 | 1.2E-06      | 2.29       |
| Ubiquitin-like protein ligase binding (GO: 0044389)    | 1.2E-08 | 2.0E-07      | 2.23       |
| Ubiquitin protein ligase activity (GO: 0061630)        | 1.3E-07 | 1.9E-05      | 2.45       |
| Ubiquitin-like protein ligase activity (GO: 0061659)   | 4.7E-07 | 6.0E-05      | 2.40       |
| Ubiquitin-protein transferase activity (GO: 0004842)   | 1.1E-06 | 1.3E-04      | 1.85       |

**Supplemental Figure S1. Enrichment analysis of  $\beta$ -NGF stimulated hypertrophic cartilage explants.** (a) Principal component analysis (PCA) for each biological replicate of  $\beta$ -NGF and non-stimulated controls. Gene ontology (GO) categorical grids for (b) downregulated molecular functions. To generate data: Cartilaginous tissue was excised from tibia fracture 7 days post-fracture and cultured to hypertrophy for 7 days then stimulated with or without recombinant human  $\beta$ -NGF. Samples were collected after 24 hours for RNA-seq analysis (n=3). GO terms, p values, and odds ratios were generated and computed by Enrichr. GO terms are sorted by p value, adjusted p value determined by Benjamini-Hochberg method.

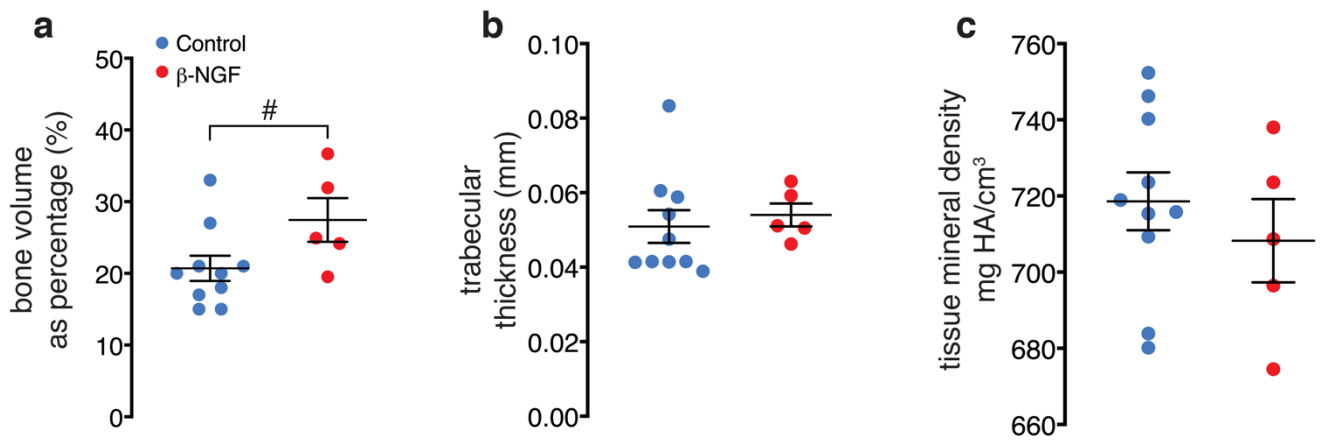

**Supplemental Figure S2.  $\mu$ CT analysis of trabecular bone within fracture callus:** Local injections of media (control) or 0.5  $\mu$ g  $\beta$ -NGF were administered once daily at 7, 8, and 9 days post-fracture (p.f.), tibias were then harvested 14 days p.f. for  $\mu$ CT analysis. Quantification of (a) bone volume as percent composition (b) average trabecular thickness and (c) tissue mineral density is shown for control (n=10) and  $\beta$ -NGF (n=5) treated mice. # = p < 0.1, determined by 2-tailed t test.

**Supplemental Table 2. Differentially expressed genes of  $\beta$ -NGF vs non-stimulated cartilage explants, generated by RNA sequencing**

| Gene name     | Log2 Fold Change<br>– $\beta$ -NGF vs Control | Log2FC<br>Standard<br>Error | P Value  | P adj    | Ensembl Gene ID    |
|---------------|-----------------------------------------------|-----------------------------|----------|----------|--------------------|
| A330009N23Rik | 1.227381921                                   | 0.47837013                  | 1.03E-02 | 4.21E-02 | ENSMUSG00000097908 |
| A630072M18Rik | -3.146527536                                  | 1.04462289                  | 2.59E-03 | 1.41E-02 | ENSMUSG00000100826 |
| A930001C03Rik | 1.848550536                                   | 0.7287824                   | 1.12E-02 | 4.49E-02 | ENSMUSG00000087132 |
| A930005H10Rik | 0.684610342                                   | 0.21224849                  | 1.26E-03 | 7.97E-03 | ENSMUSG00000054426 |
| Aagab         | 0.374100595                                   | 0.1461269                   | 1.05E-02 | 4.27E-02 | ENSMUSG00000037257 |
| Aamdc         | 0.492125764                                   | 0.14936317                  | 9.85E-04 | 6.52E-03 | ENSMUSG00000035642 |
| Aamp          | 0.457893946                                   | 0.14064317                  | 1.13E-03 | 7.33E-03 | ENSMUSG00000006299 |
| Aasdhppt      | -0.58647175                                   | 0.17843155                  | 1.01E-03 | 6.67E-03 | ENSMUSG00000025894 |
| Abat          | 1.462800077                                   | 0.38383812                  | 1.38E-04 | 1.30E-03 | ENSMUSG00000057880 |
| Abca2         | 0.671978095                                   | 0.20490783                  | 1.04E-03 | 6.82E-03 | ENSMUSG00000026944 |
| Abcb10        | 0.828390328                                   | 0.28519378                  | 3.68E-03 | 1.87E-02 | ENSMUSG00000031974 |
| Abcb8         | 1.426504588                                   | 0.38628182                  | 2.22E-04 | 1.92E-03 | ENSMUSG00000028973 |
| Abcb9         | 2.050368173                                   | 0.54629864                  | 1.75E-04 | 1.58E-03 | ENSMUSG00000029408 |
| Abcc1         | -0.827942631                                  | 0.11507962                  | 6.27E-13 | 5.32E-11 | ENSMUSG00000023088 |
| Abcd1         | 0.929308784                                   | 0.16595417                  | 2.15E-08 | 6.89E-07 | ENSMUSG00000031378 |
| Abce1         | -1.312052404                                  | 0.50970818                  | 1.00E-02 | 4.14E-02 | ENSMUSG00000058355 |
| Abhd12        | 0.692115194                                   | 0.14394131                  | 1.52E-06 | 2.93E-05 | ENSMUSG00000032046 |
| Abhd14a       | 0.502993161                                   | 0.15938403                  | 1.60E-03 | 9.60E-03 | ENSMUSG00000042210 |
| Abhd14b       | 1.133227599                                   | 0.28043941                  | 5.32E-05 | 6.05E-04 | ENSMUSG00000042073 |
| Abhd16a       | 1.215725497                                   | 0.15453559                  | 3.63E-15 | 3.95E-13 | ENSMUSG00000007036 |
| Abhd17b       | -0.716627064                                  | 0.22206637                  | 1.25E-03 | 7.94E-03 | ENSMUSG00000047368 |
| Abhd5         | -0.475643533                                  | 0.13106007                  | 2.84E-04 | 2.35E-03 | ENSMUSG00000032540 |
| Abi1          | -0.504462893                                  | 0.17964288                  | 4.98E-03 | 2.39E-02 | ENSMUSG00000058835 |
| Abi2          | -0.751482213                                  | 0.25430118                  | 3.13E-03 | 1.64E-02 | ENSMUSG00000026782 |
| Abraxas2      | -0.930632171                                  | 0.26277161                  | 3.98E-04 | 3.11E-03 | ENSMUSG00000030965 |
| AC149090.1    | -3.214344874                                  | 1.08216819                  | 2.98E-03 | 1.58E-02 | ENSMUSG00000094942 |
| Acaa1a        | 0.419107511                                   | 0.13730742                  | 2.27E-03 | 1.27E-02 | ENSMUSG00000036138 |
| Acaa2         | 0.619276685                                   | 0.11146257                  | 2.76E-08 | 8.61E-07 | ENSMUSG00000036880 |
| Acadl         | -0.449263377                                  | 0.13178367                  | 6.52E-04 | 4.67E-03 | ENSMUSG00000026003 |
| Acadvl        | 0.41257815                                    | 0.13410348                  | 2.09E-03 | 1.19E-02 | ENSMUSG00000018574 |
| Acan          | 0.826505329                                   | 0.14639636                  | 1.65E-08 | 5.47E-07 | ENSMUSG00000030607 |
| Acap2         | -0.818537866                                  | 0.23368203                  | 4.60E-04 | 3.51E-03 | ENSMUSG00000049076 |
| Acap3         | 0.647627317                                   | 0.18929874                  | 6.23E-04 | 4.49E-03 | ENSMUSG00000029033 |
| Acat2         | 0.889638497                                   | 0.16772822                  | 1.13E-07 | 2.95E-06 | ENSMUSG00000023832 |
| Acbd3         | -0.865652692                                  | 0.18982061                  | 5.11E-06 | 8.23E-05 | ENSMUSG00000026499 |
| Acbd5         | -0.758083079                                  | 0.27063407                  | 5.09E-03 | 2.43E-02 | ENSMUSG00000026781 |
| Ace           | 0.490336803                                   | 0.16489127                  | 2.94E-03 | 1.56E-02 | ENSMUSG00000020681 |
| Acot13        | -0.57455246                                   | 0.12290454                  | 2.94E-06 | 5.14E-05 | ENSMUSG00000006717 |

|          |              |            |          |          |                     |
|----------|--------------|------------|----------|----------|---------------------|
| Acp1     | -0.533980761 | 0.14632506 | 2.63E-04 | 2.21E-03 | ENSMUSG00000044573  |
| Acp2     | 0.801248407  | 0.25270288 | 1.52E-03 | 9.22E-03 | ENSMUSG00000002103  |
| Acsl4    | -1.010458375 | 0.17406692 | 6.44E-09 | 2.35E-07 | ENSMUSG000000031278 |
| Acta2    | 0.735187108  | 0.12900834 | 1.21E-08 | 4.21E-07 | ENSMUSG000000035783 |
| Actb     | 0.605897218  | 0.09901006 | 9.38E-10 | 4.30E-08 | ENSMUSG000000029580 |
| Actn4    | 0.279889635  | 0.10490155 | 7.63E-03 | 3.34E-02 | ENSMUSG000000054808 |
| Actr2    | -0.739799971 | 0.204478   | 2.97E-04 | 2.44E-03 | ENSMUSG000000020152 |
| Actr3b   | 0.749998404  | 0.25277958 | 3.01E-03 | 1.59E-02 | ENSMUSG000000056367 |
| Acy3     | 1.274988754  | 0.30572246 | 3.04E-05 | 3.75E-04 | ENSMUSG000000024866 |
| Acyp2    | 1.749659991  | 0.56415403 | 1.93E-03 | 1.11E-02 | ENSMUSG000000060923 |
| Adam15   | 0.377648192  | 0.13887447 | 6.54E-03 | 2.96E-02 | ENSMUSG000000028041 |
| Adam19   | 0.864258499  | 0.23364865 | 2.16E-04 | 1.88E-03 | ENSMUSG000000011256 |
| Adam23   | 0.505778657  | 0.19053128 | 7.94E-03 | 3.44E-02 | ENSMUSG000000025964 |
| Adamts10 | 0.720909124  | 0.18119216 | 6.93E-05 | 7.50E-04 | ENSMUSG000000024299 |
| Adamts15 | 2.292570584  | 0.51262891 | 7.74E-06 | 1.17E-04 | ENSMUSG000000033453 |
| Adamts17 | 1.494637077  | 0.58944788 | 1.12E-02 | 4.50E-02 | ENSMUSG000000058145 |
| Adamts2  | 0.513008201  | 0.14316149 | 3.39E-04 | 2.73E-03 | ENSMUSG000000036545 |
| Adamts5  | -1.137852045 | 0.21461949 | 1.15E-07 | 2.98E-06 | ENSMUSG000000022894 |
| Adamts11 | 0.924447229  | 0.23063128 | 6.11E-05 | 6.79E-04 | ENSMUSG000000066113 |
| Adck1    | 0.811818213  | 0.24233848 | 8.08E-04 | 5.59E-03 | ENSMUSG000000021044 |
| Adcy3    | 0.604928627  | 0.23248453 | 9.27E-03 | 3.88E-02 | ENSMUSG000000020654 |
| Adcy5    | 1.594189712  | 0.4940954  | 1.25E-03 | 7.95E-03 | ENSMUSG000000022840 |
| Adcy9    | 1.132682185  | 0.40378432 | 5.03E-03 | 2.41E-02 | ENSMUSG000000005580 |
| Add1     | 0.587088597  | 0.15146529 | 1.06E-04 | 1.05E-03 | ENSMUSG000000029106 |
| Adgrd1   | 1.455503039  | 0.3660751  | 7.01E-05 | 7.56E-04 | ENSMUSG000000044017 |
| Adgre5   | 0.794826615  | 0.21876298 | 2.80E-04 | 2.32E-03 | ENSMUSG000000002885 |
| Adh7     | -0.578742113 | 0.19207673 | 2.59E-03 | 1.41E-02 | ENSMUSG000000055301 |
| Adipoq   | 2.421235445  | 0.68397561 | 4.00E-04 | 3.12E-03 | ENSMUSG000000022878 |
| Adrb3    | 3.411478625  | 0.98136567 | 5.08E-04 | 3.80E-03 | ENSMUSG000000031489 |
| Adss     | -0.807542832 | 0.17585075 | 4.39E-06 | 7.24E-05 | ENSMUSG000000015961 |
| Aebp1    | 0.35295284   | 0.11102681 | 1.48E-03 | 9.00E-03 | ENSMUSG000000020473 |
| Aebp2    | -0.788252822 | 0.24879912 | 1.53E-03 | 9.30E-03 | ENSMUSG000000030232 |
| Aes      | 0.459724042  | 0.13145574 | 4.70E-04 | 3.57E-03 | ENSMUSG000000054452 |
| Aff4     | -0.812154454 | 0.17953639 | 6.08E-06 | 9.56E-05 | ENSMUSG000000049470 |
| Afg3l1   | 0.664180929  | 0.16764864 | 7.44E-05 | 7.95E-04 | ENSMUSG000000031967 |
| Afg3l2   | -0.463119408 | 0.17714537 | 8.94E-03 | 3.77E-02 | ENSMUSG000000024527 |
| Aftph    | -0.970068398 | 0.27988803 | 5.28E-04 | 3.92E-03 | ENSMUSG000000049659 |
| Agfg1    | -0.464365609 | 0.1777036  | 8.97E-03 | 3.78E-02 | ENSMUSG000000026159 |
| Ago2     | -0.652706882 | 0.18817867 | 5.23E-04 | 3.89E-03 | ENSMUSG000000036698 |
| Agpat2   | 0.58086638   | 0.17772203 | 1.08E-03 | 7.04E-03 | ENSMUSG000000026922 |
| Agpat3   | 0.720640407  | 0.12746778 | 1.57E-08 | 5.27E-07 | ENSMUSG000000001211 |
| Agpat4   | 0.326393957  | 0.11092341 | 3.26E-03 | 1.70E-02 | ENSMUSG000000023827 |
| Agt      | 0.562059434  | 0.12169394 | 3.86E-06 | 6.51E-05 | ENSMUSG000000031980 |

|          |              |            |          |          |                    |
|----------|--------------|------------|----------|----------|--------------------|
| Agtpbp1  | -0.700577501 | 0.25990009 | 7.03E-03 | 3.14E-02 | ENSMUSG00000021557 |
| Agtrap   | 0.919526107  | 0.17671452 | 1.96E-07 | 4.77E-06 | ENSMUSG00000029007 |
| Ahctf1   | -1.040477995 | 0.32813758 | 1.52E-03 | 9.22E-03 | ENSMUSG00000026491 |
| Ahdc1    | 0.517176622  | 0.15930467 | 1.17E-03 | 7.53E-03 | ENSMUSG00000037692 |
| Ahr      | -1.733330964 | 0.49749559 | 4.94E-04 | 3.71E-03 | ENSMUSG00000019256 |
| Ahsa2    | -0.560363146 | 0.20945361 | 7.46E-03 | 3.28E-02 | ENSMUSG00000020288 |
| Ahsg     | 7.621590868  | 1.53131031 | 6.45E-07 | 1.38E-05 | ENSMUSG00000022868 |
| Al413582 | 0.374369987  | 0.12107483 | 1.99E-03 | 1.14E-02 | ENSMUSG00000062753 |
| Aimp1    | -0.582887148 | 0.13254869 | 1.09E-05 | 1.57E-04 | ENSMUSG00000028029 |
| Ak1      | 0.584090041  | 0.1306009  | 7.74E-06 | 1.17E-04 | ENSMUSG00000026817 |
| Ak3      | 0.607771909  | 0.12591075 | 1.39E-06 | 2.68E-05 | ENSMUSG00000024782 |
| Ak4      | 0.545874914  | 0.17105466 | 1.42E-03 | 8.71E-03 | ENSMUSG00000028527 |
| Ak6      | -0.456964638 | 0.16513572 | 5.65E-03 | 2.64E-02 | ENSMUSG00000078941 |
| Akap12   | -0.837924421 | 0.29150364 | 4.05E-03 | 2.01E-02 | ENSMUSG00000038587 |
| Akr1b10  | 1.057941266  | 0.30358282 | 4.92E-04 | 3.70E-03 | ENSMUSG00000061758 |
| Akr1c18  | 2.957520795  | 1.05703955 | 5.14E-03 | 2.45E-02 | ENSMUSG00000021214 |
| Akr7a5   | 0.372057413  | 0.13374335 | 5.40E-03 | 2.54E-02 | ENSMUSG00000028743 |
| Akt1     | 0.486775246  | 0.13500505 | 3.11E-04 | 2.54E-03 | ENSMUSG00000001729 |
| Akt3     | -1.141011673 | 0.23655352 | 1.41E-06 | 2.73E-05 | ENSMUSG00000019699 |
| Alas1    | 0.617026268  | 0.17227312 | 3.41E-04 | 2.74E-03 | ENSMUSG00000032786 |
| Aldh16a1 | 1.231641581  | 0.27273816 | 6.31E-06 | 9.86E-05 | ENSMUSG00000007833 |
| Aldh1l2  | -1.114102964 | 0.24510857 | 5.48E-06 | 8.74E-05 | ENSMUSG00000020256 |
| Aldh3a1  | 0.789576749  | 0.3023238  | 9.01E-03 | 3.79E-02 | ENSMUSG00000019102 |
| Aldh3b1  | 1.178207369  | 0.31453541 | 1.80E-04 | 1.61E-03 | ENSMUSG00000024885 |
| Aldh4a1  | 1.100951388  | 0.28908599 | 1.40E-04 | 1.31E-03 | ENSMUSG00000028737 |
| Aldh5a1  | 1.128921329  | 0.29811936 | 1.53E-04 | 1.41E-03 | ENSMUSG00000035936 |
| Aldh7a1  | 0.72614424   | 0.19244418 | 1.61E-04 | 1.47E-03 | ENSMUSG00000053644 |
| Aldoa    | 0.580422381  | 0.0941621  | 7.09E-10 | 3.35E-08 | ENSMUSG00000030695 |
| Aldoc    | 1.157741851  | 0.16752117 | 4.81E-12 | 3.54E-10 | ENSMUSG00000017390 |
| Alg10b   | -1.066176678 | 0.38779151 | 5.97E-03 | 2.75E-02 | ENSMUSG00000075470 |
| Alg11    | -1.056267715 | 0.26839413 | 8.30E-05 | 8.63E-04 | ENSMUSG00000063362 |
| Alkbh1   | -0.60897971  | 0.19321861 | 1.62E-03 | 9.71E-03 | ENSMUSG00000079036 |
| Alox5ap  | 1.402288029  | 0.33222003 | 2.43E-05 | 3.10E-04 | ENSMUSG00000060063 |
| Alpl     | 1.742527994  | 0.13881255 | 3.82E-36 | 3.14E-33 | ENSMUSG00000028766 |
| Als2cl   | 1.540805555  | 0.23870363 | 1.08E-10 | 6.20E-09 | ENSMUSG00000044037 |
| Amd1     | -1.080494723 | 0.38901371 | 5.48E-03 | 2.57E-02 | ENSMUSG00000075232 |
| Amdhd2   | 0.732780612  | 0.20976009 | 4.77E-04 | 3.60E-03 | ENSMUSG00000036820 |
| Ammecr1  | -0.616296404 | 0.18389812 | 8.04E-04 | 5.57E-03 | ENSMUSG00000042225 |
| Amn1     | -0.967212051 | 0.30148834 | 1.34E-03 | 8.33E-03 | ENSMUSG00000068250 |
| Amotl2   | 0.880084557  | 0.16388415 | 7.87E-08 | 2.14E-06 | ENSMUSG00000032531 |
| Ampd3    | -1.456346958 | 0.18905228 | 1.32E-14 | 1.34E-12 | ENSMUSG00000005686 |
| Anapc13  | 0.690348136  | 0.13926329 | 7.15E-07 | 1.50E-05 | ENSMUSG00000035048 |
| Anapc16  | -0.551682967 | 0.12859803 | 1.79E-05 | 2.40E-04 | ENSMUSG00000020107 |

|          |              |            |          |          |                     |
|----------|--------------|------------|----------|----------|---------------------|
| Anapc5   | 0.32764636   | 0.12178083 | 7.14E-03 | 3.17E-02 | ENSMUSG00000029472  |
| Angpt4   | 1.455207376  | 0.21179305 | 6.38E-12 | 4.61E-10 | ENSMUSG00000027460  |
| Angptl2  | -0.644951024 | 0.1368678  | 2.45E-06 | 4.41E-05 | ENSMUSG00000004105  |
| Angptl4  | 0.484209213  | 0.130281   | 2.02E-04 | 1.78E-03 | ENSMUSG00000002289  |
| Angptl6  | -0.60719927  | 0.16667694 | 2.70E-04 | 2.25E-03 | ENSMUSG00000038742  |
| Angptl7  | 1.497052541  | 0.2477407  | 1.51E-09 | 6.43E-08 | ENSMUSG00000028989  |
| Ankhd1   | -0.892235533 | 0.28500457 | 1.74E-03 | 1.03E-02 | ENSMUSG00000024483  |
| Ankrd11  | -0.898629127 | 0.19717164 | 5.17E-06 | 8.30E-05 | ENSMUSG00000035569  |
| Ankrd12  | -1.125132361 | 0.35335978 | 1.45E-03 | 8.89E-03 | ENSMUSG00000034647  |
| Ankrd13a | 0.493375475  | 0.14097015 | 4.66E-04 | 3.54E-03 | ENSMUSG000000041870 |
| Ankrd17  | -0.800796038 | 0.20930291 | 1.30E-04 | 1.24E-03 | ENSMUSG000000055204 |
| Ankrd37  | 1.74415742   | 0.27313874 | 1.71E-10 | 9.32E-09 | ENSMUSG000000050914 |
| Ankrd46  | 0.710504718  | 0.14094408 | 4.63E-07 | 1.02E-05 | ENSMUSG000000048307 |
| Ankrd52  | 1.771572728  | 0.62278837 | 4.45E-03 | 2.18E-02 | ENSMUSG000000014498 |
| Ano10    | 0.512836008  | 0.20377666 | 1.18E-02 | 4.70E-02 | ENSMUSG000000037949 |
| Ano8     | 0.813362289  | 0.28378144 | 4.15E-03 | 2.06E-02 | ENSMUSG000000034863 |
| Anp32a   | -0.50972407  | 0.17989271 | 4.60E-03 | 2.24E-02 | ENSMUSG000000032249 |
| Anp32b   | -0.571123473 | 0.10940449 | 1.79E-07 | 4.40E-06 | ENSMUSG000000028333 |
| Antxr2   | 0.506245026  | 0.17747949 | 4.34E-03 | 2.13E-02 | ENSMUSG000000029338 |
| Anxa2    | 0.392128974  | 0.10099453 | 1.03E-04 | 1.03E-03 | ENSMUSG000000032231 |
| Aoc3     | 0.724903975  | 0.25885597 | 5.10E-03 | 2.43E-02 | ENSMUSG000000019326 |
| Aopep    | 1.299811952  | 0.14391416 | 1.69E-19 | 3.04E-17 | ENSMUSG000000021458 |
| Ap1b1    | 0.486920088  | 0.19200022 | 1.12E-02 | 4.49E-02 | ENSMUSG000000009090 |
| Ap1g2    | 0.920004141  | 0.29991244 | 2.16E-03 | 1.22E-02 | ENSMUSG000000040701 |
| Ap1s1    | 0.625637663  | 0.12834529 | 1.09E-06 | 2.18E-05 | ENSMUSG000000004849 |
| Ap2s1    | 0.48531418   | 0.18359991 | 8.21E-03 | 3.52E-02 | ENSMUSG000000008036 |
| Ap3d1    | 0.675256357  | 0.13678432 | 7.95E-07 | 1.65E-05 | ENSMUSG000000020198 |
| Ap3m1    | -0.749147168 | 0.20512279 | 2.60E-04 | 2.19E-03 | ENSMUSG000000021824 |
| Ap5b1    | 2.70095288   | 0.62718313 | 1.66E-05 | 2.25E-04 | ENSMUSG000000049562 |
| Ap5s1    | 0.755628988  | 0.21736189 | 5.08E-04 | 3.80E-03 | ENSMUSG000000068264 |
| Ap5z1    | 0.777749124  | 0.27870504 | 5.26E-03 | 2.49E-02 | ENSMUSG000000039623 |
| Apbb1    | 0.950308365  | 0.264297   | 3.24E-04 | 2.63E-03 | ENSMUSG000000037032 |
| Apex1    | 0.543098853  | 0.15816302 | 5.95E-04 | 4.32E-03 | ENSMUSG000000035960 |
| Api5     | -0.523701412 | 0.1524935  | 5.94E-04 | 4.32E-03 | ENSMUSG000000027193 |
| Apln     | 1.545034411  | 0.2179496  | 1.35E-12 | 1.05E-10 | ENSMUSG000000037010 |
| Aplp1    | 0.622537744  | 0.23178088 | 7.23E-03 | 3.21E-02 | ENSMUSG000000006651 |
| Apmap    | 1.085975994  | 0.24084171 | 6.51E-06 | 1.01E-04 | ENSMUSG000000033096 |
| Apobec1  | -0.663700979 | 0.23298089 | 4.39E-03 | 2.15E-02 | ENSMUSG000000040613 |
| Apobr    | 1.977400631  | 0.43736681 | 6.15E-06 | 9.63E-05 | ENSMUSG000000042759 |
| Apod     | 0.423171645  | 0.15220489 | 5.43E-03 | 2.56E-02 | ENSMUSG000000022548 |
| Apoe     | 0.744274368  | 0.16595996 | 7.30E-06 | 1.12E-04 | ENSMUSG000000002985 |
| Apol6    | 2.851398975  | 0.61265823 | 3.25E-06 | 5.61E-05 | ENSMUSG000000033576 |
| Appl1    | -0.86381603  | 0.22114611 | 9.38E-05 | 9.54E-04 | ENSMUSG000000040760 |



|          |              |            |          |          |                    |
|----------|--------------|------------|----------|----------|--------------------|
| Aqp1     | -0.786719865 | 0.14276436 | 3.58E-08 | 1.08E-06 | ENSMUSG0000004655  |
| Aqp7     | 3.477376174  | 1.08339292 | 1.33E-03 | 8.29E-03 | ENSMUSG00000028427 |
| Araf     | 0.550188284  | 0.16480523 | 8.43E-04 | 5.78E-03 | ENSMUSG00000001127 |
| Arap1    | 0.902304376  | 0.18411212 | 9.54E-07 | 1.95E-05 | ENSMUSG00000032812 |
| Arap2    | -0.845241058 | 0.2936105  | 3.99E-03 | 1.99E-02 | ENSMUSG00000037999 |
| Arf3     | 0.512096286  | 0.14813722 | 5.46E-04 | 4.03E-03 | ENSMUSG00000051853 |
| Arfgap2  | 0.791497087  | 0.29884612 | 8.08E-03 | 3.48E-02 | ENSMUSG00000027255 |
| Arfgef1  | -1.242035036 | 0.24227522 | 2.95E-07 | 6.80E-06 | ENSMUSG00000067851 |
| Arfip1   | -0.675407698 | 0.15855717 | 2.05E-05 | 2.69E-04 | ENSMUSG00000074513 |
| Arg2     | -1.681642067 | 0.63775099 | 8.37E-03 | 3.58E-02 | ENSMUSG00000021125 |
| Arhgap1  | 0.581849626  | 0.16387489 | 3.84E-04 | 3.02E-03 | ENSMUSG00000027247 |
| Arhgap10 | -0.629710146 | 0.20467273 | 2.09E-03 | 1.19E-02 | ENSMUSG00000037148 |
| Arhgap21 | -0.683403791 | 0.2633     | 9.44E-03 | 3.94E-02 | ENSMUSG00000036591 |
| Arhgap23 | 0.71456901   | 0.17084817 | 2.88E-05 | 3.58E-04 | ENSMUSG00000049807 |
| Arhgap44 | -0.690722002 | 0.26907149 | 1.03E-02 | 4.20E-02 | ENSMUSG00000033389 |
| Arhgap45 | 1.345397463  | 0.53815702 | 1.24E-02 | 4.86E-02 | ENSMUSG00000035697 |
| Arhgap5  | -1.010597549 | 0.2134618  | 2.20E-06 | 4.03E-05 | ENSMUSG00000035133 |
| Arhgdia  | 0.336411257  | 0.12648713 | 7.82E-03 | 3.40E-02 | ENSMUSG00000025132 |
| Arhgdib  | 0.472080084  | 0.12170823 | 1.05E-04 | 1.04E-03 | ENSMUSG00000030220 |
| Arhgef1  | 0.523937114  | 0.15859263 | 9.54E-04 | 6.37E-03 | ENSMUSG00000040940 |
| Arhgef17 | 0.539881197  | 0.15481071 | 4.88E-04 | 3.68E-03 | ENSMUSG00000032875 |
| Arhgef25 | 0.461264292  | 0.15169315 | 2.36E-03 | 1.31E-02 | ENSMUSG00000019467 |
| Arhgef40 | 0.815695588  | 0.19262439 | 2.29E-05 | 2.95E-04 | ENSMUSG00000004562 |
| Arid4a   | -0.867504976 | 0.33271281 | 9.12E-03 | 3.83E-02 | ENSMUSG00000048118 |
| Arid4b   | -1.365958555 | 0.30580877 | 7.94E-06 | 1.19E-04 | ENSMUSG00000039219 |
| Arid5b   | -0.803198538 | 0.18509721 | 1.43E-05 | 1.98E-04 | ENSMUSG00000019947 |
| Arih1    | -0.868540478 | 0.18132281 | 1.67E-06 | 3.17E-05 | ENSMUSG00000025234 |
| Arl1     | -1.059490438 | 0.15079535 | 2.13E-12 | 1.61E-10 | ENSMUSG00000060904 |
| Arl14ep  | -0.701162505 | 0.23982645 | 3.46E-03 | 1.78E-02 | ENSMUSG00000027122 |
| Arl14epI | -4.725950461 | 1.13429897 | 3.09E-05 | 3.81E-04 | ENSMUSG00000073568 |
| Arl15    | -1.02840313  | 0.31784052 | 1.21E-03 | 7.76E-03 | ENSMUSG00000042348 |
| Arl2     | 0.390536991  | 0.13327161 | 3.39E-03 | 1.75E-02 | ENSMUSG00000024944 |
| Arl4d    | -1.282100541 | 0.39602071 | 1.21E-03 | 7.73E-03 | ENSMUSG00000034936 |
| Armc1    | -0.478155526 | 0.14945668 | 1.38E-03 | 8.54E-03 | ENSMUSG00000027599 |
| Armc10   | -0.864499241 | 0.26089643 | 9.21E-04 | 6.22E-03 | ENSMUSG00000038525 |
| Armc5    | 0.94281376   | 0.30741678 | 2.16E-03 | 1.22E-02 | ENSMUSG00000042178 |
| Armcx2   | 0.516218478  | 0.17116393 | 2.56E-03 | 1.40E-02 | ENSMUSG00000033436 |
| Armcx3   | -0.676127209 | 0.23836058 | 4.56E-03 | 2.22E-02 | ENSMUSG00000049047 |
| Arpc1a   | 0.359530185  | 0.13406071 | 7.32E-03 | 3.24E-02 | ENSMUSG00000029621 |
| Arpc1b   | 0.360422721  | 0.12839183 | 5.00E-03 | 2.39E-02 | ENSMUSG00000029622 |
| Arpc4    | 0.391005518  | 0.1125294  | 5.11E-04 | 3.82E-03 | ENSMUSG00000079426 |
| Arpc5I   | -0.483539912 | 0.13204615 | 2.50E-04 | 2.12E-03 | ENSMUSG00000026755 |
| Arpin    | 0.763437168  | 0.23554964 | 1.19E-03 | 7.66E-03 | ENSMUSG00000039043 |

|          |              |            |          |          |                    |
|----------|--------------|------------|----------|----------|--------------------|
| Arrb1    | 1.269302673  | 0.23759586 | 9.18E-08 | 2.45E-06 | ENSMUSG00000018909 |
| Arrdc1   | 0.880213841  | 0.3132412  | 4.95E-03 | 2.38E-02 | ENSMUSG00000026972 |
| Arrdc4   | -0.685232332 | 0.12677052 | 6.47E-08 | 1.81E-06 | ENSMUSG00000042659 |
| Arsg     | 1.350377157  | 0.39866312 | 7.06E-04 | 4.99E-03 | ENSMUSG00000020604 |
| Arvcf    | 2.866163899  | 0.28891461 | 3.39E-23 | 1.04E-20 | ENSMUSG00000000325 |
| Arxes2   | 1.2791248    | 0.42198634 | 2.44E-03 | 1.35E-02 | ENSMUSG00000048040 |
| Asap1    | -0.632940128 | 0.21420486 | 3.13E-03 | 1.64E-02 | ENSMUSG00000022377 |
| Asb1     | 0.780772973  | 0.31361925 | 1.28E-02 | 4.97E-02 | ENSMUSG00000026311 |
| Asna1    | 0.410234118  | 0.14083712 | 3.58E-03 | 1.83E-02 | ENSMUSG00000052456 |
| Asns     | -0.839262495 | 0.1185995  | 1.48E-12 | 1.13E-10 | ENSMUSG00000029752 |
| Asnsd1   | -0.810136905 | 0.17360383 | 3.06E-06 | 5.33E-05 | ENSMUSG00000026095 |
| Aspa     | 0.975290687  | 0.38772806 | 1.19E-02 | 4.71E-02 | ENSMUSG00000020774 |
| Asxl2    | -1.133433678 | 0.30982799 | 2.54E-04 | 2.14E-03 | ENSMUSG00000037486 |
| Atad1    | -0.985185003 | 0.21364884 | 4.00E-06 | 6.69E-05 | ENSMUSG00000013662 |
| Atad2b   | -0.895584898 | 0.28000117 | 1.38E-03 | 8.55E-03 | ENSMUSG00000052812 |
| Ate1     | -0.58763971  | 0.19823066 | 3.03E-03 | 1.60E-02 | ENSMUSG00000030850 |
| Atf1     | -0.719713264 | 0.20042999 | 3.30E-04 | 2.67E-03 | ENSMUSG00000023027 |
| Atf4     | -0.524150885 | 0.117093   | 7.59E-06 | 1.15E-04 | ENSMUSG00000042406 |
| Atf6     | -0.710794492 | 0.27642159 | 1.01E-02 | 4.16E-02 | ENSMUSG00000026663 |
| Atf6b    | 0.611574242  | 0.192391   | 1.48E-03 | 9.00E-03 | ENSMUSG00000015461 |
| Atf7ip   | -0.881620103 | 0.23062276 | 1.32E-04 | 1.25E-03 | ENSMUSG00000030213 |
| Atg12    | -0.662757567 | 0.14870603 | 8.32E-06 | 1.24E-04 | ENSMUSG00000032905 |
| Atg4c    | -0.824843186 | 0.30310616 | 6.50E-03 | 2.94E-02 | ENSMUSG00000028550 |
| Atg5     | -0.650834281 | 0.18162506 | 3.39E-04 | 2.73E-03 | ENSMUSG00000038160 |
| Atl2     | -1.128626804 | 0.2324727  | 1.20E-06 | 2.37E-05 | ENSMUSG00000059811 |
| Atoh8    | 1.97863204   | 0.29667402 | 2.57E-11 | 1.66E-09 | ENSMUSG00000037621 |
| Atp13a1  | 0.626706493  | 0.16955967 | 2.19E-04 | 1.90E-03 | ENSMUSG00000031862 |
| Atp13a2  | 0.783870575  | 0.29503433 | 7.89E-03 | 3.42E-02 | ENSMUSG00000036622 |
| Atp13a3  | -1.25162704  | 0.1766161  | 1.37E-12 | 1.06E-10 | ENSMUSG00000022533 |
| Atp2b1   | -0.725318932 | 0.2344305  | 1.98E-03 | 1.13E-02 | ENSMUSG00000019943 |
| Atp5b    | 0.314972168  | 0.10531808 | 2.78E-03 | 1.49E-02 | ENSMUSG00000025393 |
| Atp5g3   | 0.451777602  | 0.13518166 | 8.32E-04 | 5.71E-03 | ENSMUSG00000018770 |
| Atp5k    | 0.462664899  | 0.10368638 | 8.11E-06 | 1.21E-04 | ENSMUSG00000050856 |
| Atp6ap1  | 0.537975666  | 0.14667093 | 2.45E-04 | 2.08E-03 | ENSMUSG00000019087 |
| Atp6ap2  | -0.479469995 | 0.15440681 | 1.90E-03 | 1.10E-02 | ENSMUSG00000031007 |
| Atp6v0a1 | 0.90798547   | 0.19061255 | 1.90E-06 | 3.56E-05 | ENSMUSG00000019302 |
| Atp6v0d1 | 0.391764346  | 0.14226003 | 5.89E-03 | 2.72E-02 | ENSMUSG00000013160 |
| Atp6v0d2 | -1.487893765 | 0.37793483 | 8.25E-05 | 8.60E-04 | ENSMUSG00000028238 |
| Atp6v0e  | 0.300001424  | 0.10030756 | 2.78E-03 | 1.49E-02 | ENSMUSG00000015575 |
| Atp6v1a  | -0.545192195 | 0.15796359 | 5.58E-04 | 4.10E-03 | ENSMUSG00000052459 |
| Atp6v1c1 | -0.595092846 | 0.1479919  | 5.79E-05 | 6.46E-04 | ENSMUSG00000022295 |
| Atp6v1f  | 0.359993916  | 0.11244858 | 1.37E-03 | 8.49E-03 | ENSMUSG00000004285 |
| Atp7a    | -0.899112218 | 0.33591693 | 7.44E-03 | 3.28E-02 | ENSMUSG00000033792 |

|               |              |            |          |          |                    |
|---------------|--------------|------------|----------|----------|--------------------|
| Atp8b1        | -1.501948708 | 0.43851816 | 6.15E-04 | 4.44E-03 | ENSMUSG00000039529 |
| Atp9a         | 0.738601499  | 0.19697074 | 1.77E-04 | 1.59E-03 | ENSMUSG00000027546 |
| Atp9b         | 0.698520377  | 0.23461433 | 2.91E-03 | 1.55E-02 | ENSMUSG00000024566 |
| Atpsckmt      | 0.898621056  | 0.20456846 | 1.12E-05 | 1.60E-04 | ENSMUSG00000039065 |
| Atraid        | 0.569772171  | 0.11212934 | 3.75E-07 | 8.43E-06 | ENSMUSG00000013622 |
| Atrx          | -0.650774643 | 0.2557472  | 1.09E-02 | 4.42E-02 | ENSMUSG00000031229 |
| Atxn7l3       | 0.398145489  | 0.1482995  | 7.26E-03 | 3.21E-02 | ENSMUSG00000059995 |
| AU020206      | -1.462465897 | 0.57151219 | 1.05E-02 | 4.28E-02 | ENSMUSG00000097392 |
| AV099323      | 1.202627592  | 0.43530957 | 5.73E-03 | 2.67E-02 | ENSMUSG00000087377 |
| Aven          | 0.79298155   | 0.25308494 | 1.73E-03 | 1.02E-02 | ENSMUSG00000003604 |
| Avil          | 0.581856243  | 0.21093187 | 5.81E-03 | 2.70E-02 | ENSMUSG00000025432 |
| Avpi1         | -0.433136878 | 0.13029261 | 8.86E-04 | 6.02E-03 | ENSMUSG00000018821 |
| Azi2          | -0.705617389 | 0.20167698 | 4.67E-04 | 3.55E-03 | ENSMUSG00000039285 |
| Azin1         | -0.564292031 | 0.16574041 | 6.62E-04 | 4.72E-03 | ENSMUSG00000037458 |
| B230219D22Rik | -0.734516251 | 0.21926445 | 8.08E-04 | 5.59E-03 | ENSMUSG00000045767 |
| B3galt6       | 0.705116969  | 0.28063958 | 1.20E-02 | 4.74E-02 | ENSMUSG00000050796 |
| B3gnt8        | 2.268365755  | 0.40054033 | 1.49E-08 | 5.01E-07 | ENSMUSG00000059479 |
| B3gnt9        | 0.781844403  | 0.2609447  | 2.73E-03 | 1.47E-02 | ENSMUSG00000069920 |
| B4galnt1      | 0.353984438  | 0.14035241 | 1.17E-02 | 4.63E-02 | ENSMUSG00000006731 |
| B4galt1       | 0.62218487   | 0.12532519 | 6.89E-07 | 1.45E-05 | ENSMUSG00000028413 |
| B4gat1        | 1.122035446  | 0.16336133 | 6.49E-12 | 4.64E-10 | ENSMUSG00000047379 |
| B9d1          | 1.17869999   | 0.21367206 | 3.46E-08 | 1.05E-06 | ENSMUSG00000001039 |
| Babam1        | 0.321618221  | 0.11663475 | 5.82E-03 | 2.70E-02 | ENSMUSG00000031820 |
| Bace1         | 0.549827515  | 0.14430961 | 1.39E-04 | 1.31E-03 | ENSMUSG00000032086 |
| Bad           | 0.525612441  | 0.12321884 | 1.99E-05 | 2.64E-04 | ENSMUSG00000024959 |
| Bag3          | 0.602558916  | 0.15471243 | 9.83E-05 | 9.90E-04 | ENSMUSG00000030847 |
| Bag6          | 0.348774021  | 0.13159822 | 8.04E-03 | 3.47E-02 | ENSMUSG00000024392 |
| Bambi         | 0.999548442  | 0.21333072 | 2.79E-06 | 4.95E-05 | ENSMUSG00000024232 |
| Baz1a         | -0.855078365 | 0.22604335 | 1.55E-04 | 1.43E-03 | ENSMUSG00000035021 |
| Bbx           | -0.76076647  | 0.29129384 | 9.01E-03 | 3.79E-02 | ENSMUSG00000022641 |
| BC002059      | -1.669164148 | 0.60659672 | 5.93E-03 | 2.74E-02 | ENSMUSG00000060149 |
| BC004004      | 0.393859821  | 0.11417786 | 5.62E-04 | 4.12E-03 | ENSMUSG00000052712 |
| BC005537      | -0.691105167 | 0.15511    | 8.37E-06 | 1.25E-04 | ENSMUSG00000019132 |
| BC005561      | -0.663787586 | 0.22583285 | 3.29E-03 | 1.71E-02 | ENSMUSG00000079065 |
| BC029722      | 1.068645728  | 0.16211279 | 4.34E-11 | 2.76E-09 | ENSMUSG00000074649 |
| BC031181      | 0.306274452  | 0.11558605 | 8.06E-03 | 3.48E-02 | ENSMUSG00000036299 |
| Bcar1         | 0.557407018  | 0.15209251 | 2.47E-04 | 2.10E-03 | ENSMUSG00000031955 |
| Bcar3         | 1.545651259  | 0.39324731 | 8.48E-05 | 8.77E-04 | ENSMUSG00000028121 |
| Bcas2         | -0.377188937 | 0.147194   | 1.04E-02 | 4.24E-02 | ENSMUSG00000005687 |
| Bcat1         | -0.501638696 | 0.14572025 | 5.76E-04 | 4.22E-03 | ENSMUSG00000030268 |
| Bcat2         | 0.358204611  | 0.14234385 | 1.19E-02 | 4.70E-02 | ENSMUSG00000030826 |
| Bccip         | -0.565706873 | 0.21175043 | 7.55E-03 | 3.31E-02 | ENSMUSG00000030983 |
| Bckdk         | 0.839885794  | 0.16640724 | 4.48E-07 | 9.94E-06 | ENSMUSG00000030802 |

|         |              |            |          |          |                    |
|---------|--------------|------------|----------|----------|--------------------|
| Bcl2l1  | -0.475939979 | 0.12016512 | 7.47E-05 | 7.98E-04 | ENSMUSG00000007659 |
| Bcl6    | -0.574187971 | 0.16502284 | 5.02E-04 | 3.76E-03 | ENSMUSG00000022508 |
| Bcl9l   | 0.868413619  | 0.18646725 | 3.21E-06 | 5.54E-05 | ENSMUSG00000063382 |
| Bclaf3  | -1.397988598 | 0.46140415 | 2.45E-03 | 1.35E-02 | ENSMUSG00000044150 |
| Bcs1l   | 0.546072251  | 0.1871637  | 3.53E-03 | 1.81E-02 | ENSMUSG00000026172 |
| Bdp1    | -1.087177218 | 0.32524512 | 8.30E-04 | 5.70E-03 | ENSMUSG00000049658 |
| Bend6   | -0.981685822 | 0.38888675 | 1.16E-02 | 4.61E-02 | ENSMUSG00000042182 |
| Best1   | 1.065763367  | 0.31630798 | 7.53E-04 | 5.28E-03 | ENSMUSG00000037418 |
| Bet1    | -0.677169431 | 0.14816715 | 4.87E-06 | 7.92E-05 | ENSMUSG00000032757 |
| Bet1l   | -0.423222546 | 0.11465567 | 2.23E-04 | 1.93E-03 | ENSMUSG00000025484 |
| Bfar    | -0.698584645 | 0.22454805 | 1.86E-03 | 1.09E-02 | ENSMUSG00000022684 |
| Bglap   | 1.660869543  | 0.16274596 | 1.88E-24 | 6.34E-22 | ENSMUSG00000074483 |
| Bglap2  | 1.597764934  | 0.15147686 | 5.19E-26 | 2.07E-23 | ENSMUSG00000074486 |
| Bicral  | -0.827565862 | 0.30061739 | 5.91E-03 | 2.73E-02 | ENSMUSG00000036568 |
| Birc6   | -0.696253101 | 0.21989563 | 1.54E-03 | 9.33E-03 | ENSMUSG00000024073 |
| Bloc1s3 | 1.245808486  | 0.46800302 | 7.77E-03 | 3.38E-02 | ENSMUSG00000057667 |
| Blvra   | 0.410466297  | 0.15963677 | 1.01E-02 | 4.16E-02 | ENSMUSG00000001999 |
| Blvrb   | -0.769523739 | 0.10533164 | 2.76E-13 | 2.45E-11 | ENSMUSG00000040466 |
| Blzf1   | -1.000190518 | 0.28673992 | 4.86E-04 | 3.67E-03 | ENSMUSG00000026577 |
| Bmi1    | -0.721352014 | 0.28298585 | 1.08E-02 | 4.37E-02 | ENSMUSG00000026739 |
| Bmp1    | 1.089366648  | 0.16589483 | 5.15E-11 | 3.23E-09 | ENSMUSG00000022098 |
| Bmp3    | 1.493257239  | 0.45155882 | 9.43E-04 | 6.32E-03 | ENSMUSG00000029335 |
| Bmp4    | 0.758487849  | 0.13181768 | 8.71E-09 | 3.13E-07 | ENSMUSG00000021835 |
| Bmp6    | -0.983183129 | 0.39467033 | 1.27E-02 | 4.95E-02 | ENSMUSG00000039004 |
| Bmper   | 0.517456613  | 0.16946632 | 2.26E-03 | 1.26E-02 | ENSMUSG00000031963 |
| Bms1    | -0.788401023 | 0.21610542 | 2.64E-04 | 2.21E-03 | ENSMUSG00000030138 |
| Bmyc    | 1.283419517  | 0.20265188 | 2.40E-10 | 1.28E-08 | ENSMUSG00000049086 |
| Bnip2   | -0.349516603 | 0.13332125 | 8.75E-03 | 3.71E-02 | ENSMUSG00000011958 |
| Bnip3   | 0.741639305  | 0.14347823 | 2.35E-07 | 5.58E-06 | ENSMUSG00000078566 |
| Boc     | 0.417853509  | 0.13704129 | 2.30E-03 | 1.28E-02 | ENSMUSG00000022687 |
| Bod1l   | -1.057952969 | 0.28530213 | 2.09E-04 | 1.82E-03 | ENSMUSG00000061755 |
| Borcs6  | 0.697563101  | 0.17126836 | 4.64E-05 | 5.39E-04 | ENSMUSG00000045176 |
| Borcs8  | 0.934389424  | 0.1465979  | 1.84E-10 | 9.95E-09 | ENSMUSG00000002345 |
| Bphl    | 0.599607048  | 0.1810844  | 9.29E-04 | 6.27E-03 | ENSMUSG00000038286 |
| Bptf    | -0.61878639  | 0.2474631  | 1.24E-02 | 4.86E-02 | ENSMUSG00000040481 |
| Braf    | -1.077786564 | 0.25279259 | 2.01E-05 | 2.66E-04 | ENSMUSG00000002413 |
| Brcc3   | -0.659779562 | 0.26352505 | 1.23E-02 | 4.82E-02 | ENSMUSG00000031201 |
| Brd3    | -0.403568552 | 0.14800289 | 6.40E-03 | 2.91E-02 | ENSMUSG00000026918 |
| Brd4    | -0.366779486 | 0.13762254 | 7.70E-03 | 3.36E-02 | ENSMUSG00000024002 |
| Brix1   | -1.244271451 | 0.20198303 | 7.26E-10 | 3.41E-08 | ENSMUSG00000022247 |
| Bscl2   | 1.344377835  | 0.1314258  | 1.47E-24 | 5.08E-22 | ENSMUSG00000071657 |
| Bsg     | 0.67977288   | 0.10914723 | 4.72E-10 | 2.34E-08 | ENSMUSG00000023175 |
| Btaf1   | -0.677494608 | 0.23091466 | 3.35E-03 | 1.73E-02 | ENSMUSG00000040565 |

|               |              |            |          |          |                     |
|---------------|--------------|------------|----------|----------|---------------------|
| Btbd10        | -0.894234646 | 0.3523377  | 1.11E-02 | 4.48E-02 | ENSMUSG00000038187  |
| Btbd19        | 0.912474293  | 0.29947728 | 2.31E-03 | 1.29E-02 | ENSMUSG00000073771  |
| Btf3l4        | -0.92053809  | 0.35678023 | 9.88E-03 | 4.08E-02 | ENSMUSG00000028568  |
| Btg2          | -0.674471341 | 0.20168414 | 8.25E-04 | 5.68E-03 | ENSMUSG00000020423  |
| Bzw2          | -0.615825094 | 0.11366089 | 6.02E-08 | 1.70E-06 | ENSMUSG00000020547  |
| C030006K11Rik | 0.358946695  | 0.10444181 | 5.89E-04 | 4.29E-03 | ENSMUSG000000115987 |
| C130021I20Rik | 0.966169409  | 0.29236826 | 9.51E-04 | 6.36E-03 | ENSMUSG00000052951  |
| C130050O18Rik | 1.950915079  | 0.59518208 | 1.05E-03 | 6.85E-03 | ENSMUSG00000044092  |
| C1d           | -0.586918451 | 0.16688342 | 4.37E-04 | 3.36E-03 | ENSMUSG00000000581  |
| C1galt1       | -1.167475207 | 0.3005838  | 1.03E-04 | 1.02E-03 | ENSMUSG00000042460  |
| C1qa          | 2.141226671  | 0.28297223 | 3.82E-14 | 3.67E-12 | ENSMUSG00000036887  |
| C1qb          | 2.098971842  | 0.16416632 | 1.97E-37 | 1.85E-34 | ENSMUSG00000036905  |
| C1qbp         | -0.512252841 | 0.12342353 | 3.32E-05 | 4.06E-04 | ENSMUSG00000018446  |
| C1qc          | 2.215406827  | 0.25767847 | 8.14E-18 | 1.20E-15 | ENSMUSG00000036896  |
| C1qtnf1       | 1.323419541  | 0.2434449  | 5.44E-08 | 1.55E-06 | ENSMUSG00000017446  |
| C1qtnf12      | 0.646316884  | 0.14132074 | 4.80E-06 | 7.82E-05 | ENSMUSG00000023571  |
| C1qtnf3       | -0.646367322 | 0.16850415 | 1.25E-04 | 1.20E-03 | ENSMUSG00000058914  |
| C1qtnf6       | 1.033779756  | 0.2069597  | 5.88E-07 | 1.27E-05 | ENSMUSG00000022440  |
| C1ra          | 0.598119836  | 0.20753453 | 3.95E-03 | 1.98E-02 | ENSMUSG00000055172  |
| C1rl          | 1.685936751  | 0.26411727 | 1.73E-10 | 9.43E-09 | ENSMUSG00000038527  |
| C77080        | -0.718083342 | 0.25898329 | 5.56E-03 | 2.61E-02 | ENSMUSG00000050390  |
| Cacna1g       | 1.039162129  | 0.3619054  | 4.09E-03 | 2.03E-02 | ENSMUSG00000020866  |
| Cacl1         | -0.507053291 | 0.20252617 | 1.23E-02 | 4.82E-02 | ENSMUSG00000033417  |
| Cacybp        | -1.313759622 | 0.24253546 | 6.07E-08 | 1.70E-06 | ENSMUSG00000014226  |
| Cadm1         | 1.20028647   | 0.22792138 | 1.39E-07 | 3.54E-06 | ENSMUSG00000032076  |
| Cald1         | -0.789702854 | 0.29144633 | 6.74E-03 | 3.03E-02 | ENSMUSG00000029761  |
| Calhm2        | 1.000798747  | 0.2818579  | 3.84E-04 | 3.02E-03 | ENSMUSG00000033033  |
| Calhm5        | 0.630535592  | 0.24394264 | 9.74E-03 | 4.03E-02 | ENSMUSG00000049872  |
| Calm3         | 0.590169544  | 0.11186306 | 1.32E-07 | 3.39E-06 | ENSMUSG00000019370  |
| Calr          | 0.825405703  | 0.09872463 | 6.24E-17 | 8.29E-15 | ENSMUSG00000003814  |
| Caly          | -3.341654429 | 0.94095864 | 3.83E-04 | 3.02E-03 | ENSMUSG00000025468  |
| Camk1         | 0.479511982  | 0.14730346 | 1.13E-03 | 7.34E-03 | ENSMUSG00000030272  |
| Camk2b        | 1.572228093  | 0.58703955 | 7.40E-03 | 3.27E-02 | ENSMUSG00000057897  |
| Camta2        | 0.917357802  | 0.27292693 | 7.76E-04 | 5.41E-03 | ENSMUSG00000040712  |
| Canx          | -0.451354644 | 0.1471663  | 2.16E-03 | 1.22E-02 | ENSMUSG00000020368  |
| Capn1         | 0.829324156  | 0.21428174 | 1.09E-04 | 1.07E-03 | ENSMUSG00000024942  |
| Capns1        | 0.544843769  | 0.09245776 | 3.79E-09 | 1.46E-07 | ENSMUSG00000001794  |
| Caprin1       | -0.790836319 | 0.1775218  | 8.39E-06 | 1.25E-04 | ENSMUSG00000027184  |
| Capza1        | -0.789606811 | 0.29441987 | 7.32E-03 | 3.24E-02 | ENSMUSG00000070372  |
| Capza2        | -0.485551587 | 0.16119406 | 2.59E-03 | 1.41E-02 | ENSMUSG00000015733  |
| Car5b         | 1.091796468  | 0.20692234 | 1.32E-07 | 3.39E-06 | ENSMUSG00000031373  |
| Car6          | -1.259822466 | 0.24543736 | 2.85E-07 | 6.65E-06 | ENSMUSG00000028972  |
| Car9          | 0.938209564  | 0.24988594 | 1.74E-04 | 1.57E-03 | ENSMUSG00000028463  |

|         |              |            |          |          |                    |
|---------|--------------|------------|----------|----------|--------------------|
| Cars    | -0.605013949 | 0.15015534 | 5.60E-05 | 6.30E-04 | ENSMUSG00000010755 |
| Cars2   | 0.878869932  | 0.31173497 | 4.81E-03 | 2.32E-02 | ENSMUSG00000056228 |
| Casp12  | -0.768837383 | 0.233776   | 1.01E-03 | 6.64E-03 | ENSMUSG00000025887 |
| Casp3   | -1.010670459 | 0.2631231  | 1.23E-04 | 1.18E-03 | ENSMUSG00000031628 |
| Casp4   | -1.589255672 | 0.3363018  | 2.29E-06 | 4.19E-05 | ENSMUSG00000033538 |
| Cast    | -0.855093475 | 0.21423843 | 6.57E-05 | 7.17E-04 | ENSMUSG00000021585 |
| Castor1 | 0.73974659   | 0.22265207 | 8.92E-04 | 6.06E-03 | ENSMUSG00000020424 |
| Cav2    | -1.176773072 | 0.22520812 | 1.74E-07 | 4.29E-06 | ENSMUSG00000000058 |
| Cavin1  | 0.432584403  | 0.12118032 | 3.57E-04 | 2.84E-03 | ENSMUSG00000004044 |
| Cavin3  | 0.558655789  | 0.11343889 | 8.45E-07 | 1.75E-05 | ENSMUSG00000037060 |
| Cbll1   | -1.09720757  | 0.29886472 | 2.41E-04 | 2.06E-03 | ENSMUSG00000020659 |
| Cbr2    | 1.700590626  | 0.15805897 | 5.36E-27 | 2.28E-24 | ENSMUSG00000025150 |
| Cbr3    | -0.427467772 | 0.12565639 | 6.69E-04 | 4.75E-03 | ENSMUSG00000022947 |
| Cbx1    | -0.615265621 | 0.12147245 | 4.08E-07 | 9.16E-06 | ENSMUSG00000018666 |
| Cbx3    | -1.520272538 | 0.41704458 | 2.67E-04 | 2.23E-03 | ENSMUSG00000029836 |
| Cbx6    | 0.418626345  | 0.12867835 | 1.14E-03 | 7.38E-03 | ENSMUSG00000089715 |
| Cc2d1b  | 0.584062975  | 0.20097361 | 3.66E-03 | 1.86E-02 | ENSMUSG00000028582 |
| Cc2d2a  | -1.139460353 | 0.41411386 | 5.93E-03 | 2.74E-02 | ENSMUSG00000039765 |
| Ccbe1   | -0.955640495 | 0.27140695 | 4.30E-04 | 3.32E-03 | ENSMUSG00000046318 |
| Ccdc107 | 0.544755112  | 0.14168116 | 1.21E-04 | 1.17E-03 | ENSMUSG00000028461 |
| Ccdc117 | -0.686523125 | 0.22273463 | 2.05E-03 | 1.17E-02 | ENSMUSG00000020482 |
| Ccdc12  | 0.617785281  | 0.14346387 | 1.66E-05 | 2.25E-04 | ENSMUSG00000019659 |
| Ccdc127 | -0.520726141 | 0.16832793 | 1.98E-03 | 1.13E-02 | ENSMUSG00000021578 |
| Ccdc159 | 3.446054145  | 0.68173527 | 4.31E-07 | 9.60E-06 | ENSMUSG00000006241 |
| Ccdc167 | 0.897542586  | 0.19456732 | 3.97E-06 | 6.65E-05 | ENSMUSG00000024018 |
| Ccdc17  | 2.027979881  | 0.59731015 | 6.86E-04 | 4.86E-03 | ENSMUSG00000034035 |
| Ccdc186 | -1.101949279 | 0.31663188 | 5.01E-04 | 3.75E-03 | ENSMUSG00000035173 |
| Ccdc22  | 0.886731992  | 0.2742959  | 1.23E-03 | 7.83E-03 | ENSMUSG00000031143 |
| Ccdc28a | 0.932553815  | 0.34223676 | 6.43E-03 | 2.92E-02 | ENSMUSG00000059554 |
| Ccdc28b | 0.881851182  | 0.23476471 | 1.72E-04 | 1.56E-03 | ENSMUSG00000028795 |
| Ccdc3   | 0.382369988  | 0.15068821 | 1.12E-02 | 4.48E-02 | ENSMUSG00000026676 |
| Ccdc34  | -0.602298091 | 0.17420097 | 5.45E-04 | 4.03E-03 | ENSMUSG00000027160 |
| Ccdc43  | -0.595279369 | 0.2292533  | 9.42E-03 | 3.93E-02 | ENSMUSG00000020925 |
| Ccdc47  | -1.015974124 | 0.19653893 | 2.35E-07 | 5.58E-06 | ENSMUSG00000078622 |
| Ccdc50  | -0.489670007 | 0.19202321 | 1.08E-02 | 4.37E-02 | ENSMUSG00000038127 |
| Ccdc59  | -0.769397523 | 0.16295889 | 2.34E-06 | 4.24E-05 | ENSMUSG00000019897 |
| Ccdc6   | -0.506221939 | 0.17182427 | 3.22E-03 | 1.68E-02 | ENSMUSG00000048701 |
| Ccdc71l | 0.758260119  | 0.1763863  | 1.72E-05 | 2.31E-04 | ENSMUSG00000090946 |
| Ccdc77  | -1.520057691 | 0.49111671 | 1.97E-03 | 1.13E-02 | ENSMUSG00000030177 |
| Ccdc8   | 0.410823688  | 0.15734847 | 9.03E-03 | 3.80E-02 | ENSMUSG00000041117 |
| Ccn1    | 0.767069524  | 0.21892015 | 4.59E-04 | 3.50E-03 | ENSMUSG00000028195 |
| Ccnb2   | 1.052097055  | 0.33380292 | 1.62E-03 | 9.71E-03 | ENSMUSG00000032218 |
| Ccnd1   | 1.590059761  | 0.11146698 | 3.62E-46 | 6.81E-43 | ENSMUSG00000070348 |

|          |              |            |          |          |                     |
|----------|--------------|------------|----------|----------|---------------------|
| Ccnd2    | -0.42530142  | 0.14843942 | 4.17E-03 | 2.06E-02 | ENSMUSG00000000184  |
| Ccnd3    | 0.501638872  | 0.15067993 | 8.71E-04 | 5.94E-03 | ENSMUSG000000034165 |
| Ccng1    | -0.594809588 | 0.1663352  | 3.49E-04 | 2.79E-03 | ENSMUSG000000020326 |
| Ccnt1    | -0.871446248 | 0.21890328 | 6.86E-05 | 7.44E-04 | ENSMUSG00000011960  |
| Ccpg1os  | 0.820064859  | 0.21790145 | 1.68E-04 | 1.52E-03 | ENSMUSG000000086158 |
| Ccser2   | -0.522134946 | 0.20123081 | 9.47E-03 | 3.94E-02 | ENSMUSG000000058690 |
| Cct2     | -0.425068483 | 0.10296957 | 3.66E-05 | 4.37E-04 | ENSMUSG000000034024 |
| Cct4     | -0.981011427 | 0.14509651 | 1.37E-11 | 9.49E-10 | ENSMUSG00000007739  |
| Cct5     | -0.630868136 | 0.11492266 | 4.03E-08 | 1.20E-06 | ENSMUSG000000022234 |
| Cct6a    | -0.311137497 | 0.11081012 | 4.99E-03 | 2.39E-02 | ENSMUSG000000029447 |
| Cct8     | -0.628595172 | 0.13002009 | 1.33E-06 | 2.60E-05 | ENSMUSG000000025613 |
| Cd109    | -0.943702423 | 0.22455875 | 2.64E-05 | 3.33E-04 | ENSMUSG000000046186 |
| Cd151    | 0.415925174  | 0.11198637 | 2.04E-04 | 1.79E-03 | ENSMUSG000000025510 |
| Cd1d1    | 0.882002993  | 0.26244618 | 7.77E-04 | 5.42E-03 | ENSMUSG000000028076 |
| Cd200    | 0.881252161  | 0.14432451 | 1.02E-09 | 4.54E-08 | ENSMUSG000000022661 |
| Cd200r4  | -1.934481084 | 0.59548576 | 1.16E-03 | 7.49E-03 | ENSMUSG000000062082 |
| Cd248    | 1.967163701  | 0.18814359 | 1.38E-25 | 5.05E-23 | ENSMUSG000000056481 |
| Cd320    | 0.536507929  | 0.17197471 | 1.81E-03 | 1.06E-02 | ENSMUSG000000002308 |
| Cd36     | -1.260265362 | 0.33955116 | 2.06E-04 | 1.80E-03 | ENSMUSG000000002944 |
| Cd47     | -0.443326421 | 0.14325015 | 1.97E-03 | 1.13E-02 | ENSMUSG000000055447 |
| Cd53     | -0.626395181 | 0.22546256 | 5.46E-03 | 2.57E-02 | ENSMUSG000000040747 |
| Cd59a    | 0.693572319  | 0.25270348 | 6.06E-03 | 2.78E-02 | ENSMUSG000000032679 |
| Cd74     | -0.94656962  | 0.2628109  | 3.16E-04 | 2.57E-03 | ENSMUSG000000024610 |
| Cd81     | 0.467756568  | 0.09603276 | 1.11E-06 | 2.21E-05 | ENSMUSG000000037706 |
| Cd9      | 0.540334503  | 0.14055744 | 1.21E-04 | 1.17E-03 | ENSMUSG000000030342 |
| Cdc16    | -0.379944134 | 0.1482212  | 1.04E-02 | 4.24E-02 | ENSMUSG000000038416 |
| Cdc34    | -0.336911358 | 0.1289029  | 8.96E-03 | 3.78E-02 | ENSMUSG000000020307 |
| Cdc3711  | -0.441230305 | 0.16573392 | 7.76E-03 | 3.38E-02 | ENSMUSG000000024780 |
| Cdc42ep1 | 1.616658003  | 0.19947963 | 5.30E-16 | 6.46E-14 | ENSMUSG000000049521 |
| Cdc42ep2 | 1.256629706  | 0.32229005 | 9.66E-05 | 9.77E-04 | ENSMUSG000000045664 |
| Cdc42ep3 | 1.146707704  | 0.19671602 | 5.57E-09 | 2.07E-07 | ENSMUSG000000036533 |
| Cdc42ep4 | 0.336884572  | 0.13491575 | 1.25E-02 | 4.89E-02 | ENSMUSG000000041598 |
| Cdc42se1 | 0.537730042  | 0.13924125 | 1.13E-04 | 1.10E-03 | ENSMUSG000000046722 |
| Cdc5l    | -1.172825803 | 0.30284921 | 1.08E-04 | 1.06E-03 | ENSMUSG000000023932 |
| Cdc73    | -0.841909069 | 0.24136446 | 4.86E-04 | 3.67E-03 | ENSMUSG000000026361 |
| Cdh11    | 0.831178475  | 0.24224806 | 6.01E-04 | 4.36E-03 | ENSMUSG000000031673 |
| Cdipt    | 0.382767609  | 0.14441632 | 8.04E-03 | 3.47E-02 | ENSMUSG000000030682 |
| Cdk10    | 0.516001321  | 0.19293441 | 7.48E-03 | 3.29E-02 | ENSMUSG000000033862 |
| Cdk11b   | -0.859447399 | 0.19753424 | 1.36E-05 | 1.89E-04 | ENSMUSG000000029062 |
| Cdk13    | -0.824292649 | 0.20826697 | 7.56E-05 | 8.02E-04 | ENSMUSG000000041297 |
| Cdk17    | -0.812585037 | 0.28429324 | 4.26E-03 | 2.10E-02 | ENSMUSG000000020015 |
| Cdk2ap2  | -0.600311104 | 0.1265163  | 2.09E-06 | 3.85E-05 | ENSMUSG000000024856 |
| Cdk5     | 0.790915114  | 0.15636215 | 4.23E-07 | 9.46E-06 | ENSMUSG000000028969 |

|          |              |            |          |          |                    |
|----------|--------------|------------|----------|----------|--------------------|
| Cdk5rap2 | -1.338747175 | 0.40673176 | 9.97E-04 | 6.58E-03 | ENSMUSG00000039298 |
| Cdk7     | -0.686378783 | 0.19399424 | 4.03E-04 | 3.14E-03 | ENSMUSG00000069089 |
| Cdkn2a   | 0.518322415  | 0.17284841 | 2.71E-03 | 1.46E-02 | ENSMUSG00000044303 |
| Cdr2     | -0.949745929 | 0.20392247 | 3.20E-06 | 5.54E-05 | ENSMUSG00000030878 |
| Cdsn     | 1.245298381  | 0.1446272  | 7.28E-18 | 1.09E-15 | ENSMUSG00000039518 |
| Cdt1     | -0.995588369 | 0.21261273 | 2.83E-06 | 5.00E-05 | ENSMUSG00000006585 |
| Cdv3     | -0.741629334 | 0.26651454 | 5.39E-03 | 2.54E-02 | ENSMUSG00000032803 |
| Cdyl     | -0.556148098 | 0.21000737 | 8.09E-03 | 3.48E-02 | ENSMUSG00000059288 |
| Cebpa    | 1.016022342  | 0.22591067 | 6.88E-06 | 1.06E-04 | ENSMUSG00000034957 |
| Cebpd    | -0.436054381 | 0.12635915 | 5.59E-04 | 4.10E-03 | ENSMUSG00000071637 |
| Cebpg    | -0.748292695 | 0.13928234 | 7.77E-08 | 2.13E-06 | ENSMUSG00000056216 |
| Cebpz    | -1.175226218 | 0.27265642 | 1.63E-05 | 2.22E-04 | ENSMUSG00000024081 |
| Cela1    | 0.87667373   | 0.24148564 | 2.83E-04 | 2.34E-03 | ENSMUSG00000023031 |
| Celf4    | -1.582205836 | 0.38614835 | 4.18E-05 | 4.94E-04 | ENSMUSG00000024268 |
| Cenpb    | 0.526874262  | 0.10832914 | 1.15E-06 | 2.28E-05 | ENSMUSG00000068267 |
| Cenpt    | 1.3132843    | 0.4307336  | 2.30E-03 | 1.28E-02 | ENSMUSG00000036672 |
| Cenpx    | 0.510585287  | 0.12258948 | 3.11E-05 | 3.83E-04 | ENSMUSG00000025144 |
| Cep350   | -1.228619714 | 0.35156081 | 4.74E-04 | 3.59E-03 | ENSMUSG00000033671 |
| Cep57    | -1.097854488 | 0.39311216 | 5.23E-03 | 2.48E-02 | ENSMUSG00000031922 |
| Cep83    | -1.687605796 | 0.52127803 | 1.21E-03 | 7.73E-03 | ENSMUSG00000020024 |
| Cercam   | 0.848947444  | 0.19953656 | 2.09E-05 | 2.74E-04 | ENSMUSG00000039787 |
| Cerk     | 0.820117096  | 0.21606316 | 1.47E-04 | 1.37E-03 | ENSMUSG00000035891 |
| Cers5    | 0.610908739  | 0.15687096 | 9.85E-05 | 9.91E-04 | ENSMUSG00000023021 |
| Cetn2    | 0.525584112  | 0.16350433 | 1.31E-03 | 8.20E-03 | ENSMUSG00000031347 |
| Cetn3    | -0.532930285 | 0.17497549 | 2.32E-03 | 1.29E-02 | ENSMUSG00000021537 |
| Cfdp1    | -0.475713618 | 0.1343401  | 3.98E-04 | 3.11E-03 | ENSMUSG00000031954 |
| Cfl2     | -0.658521847 | 0.12037273 | 4.48E-08 | 1.31E-06 | ENSMUSG00000062929 |
| Cgas     | -0.912171686 | 0.32625055 | 5.18E-03 | 2.46E-02 | ENSMUSG00000032344 |
| Cggbp1   | -0.524446938 | 0.16479401 | 1.46E-03 | 8.92E-03 | ENSMUSG00000054604 |
| Chad     | 0.744266633  | 0.24059044 | 1.98E-03 | 1.13E-02 | ENSMUSG00000039084 |
| Chchd1   | -0.441725739 | 0.13770225 | 1.34E-03 | 8.33E-03 | ENSMUSG00000063787 |
| Chchd10  | -1.054708557 | 0.13414301 | 3.76E-15 | 4.06E-13 | ENSMUSG00000049422 |
| Chchd3   | -0.3560283   | 0.14273256 | 1.26E-02 | 4.91E-02 | ENSMUSG00000053768 |
| Chd1     | -1.192524146 | 0.26900715 | 9.29E-06 | 1.35E-04 | ENSMUSG00000023852 |
| Chd2     | -0.90067751  | 0.25237039 | 3.59E-04 | 2.85E-03 | ENSMUSG00000078671 |
| Chd7     | -1.833821754 | 0.3000001  | 9.79E-10 | 4.43E-08 | ENSMUSG00000041235 |
| Chic1    | -1.035511171 | 0.36678328 | 4.75E-03 | 2.30E-02 | ENSMUSG00000031327 |
| Chic2    | -0.36644129  | 0.13865355 | 8.22E-03 | 3.53E-02 | ENSMUSG00000029229 |
| Chid1    | 0.381317761  | 0.15187182 | 1.20E-02 | 4.75E-02 | ENSMUSG00000025512 |
| Chil1    | -1.842256116 | 0.4379909  | 2.60E-05 | 3.28E-04 | ENSMUSG00000064246 |
| Chka     | -0.550451625 | 0.19625884 | 5.04E-03 | 2.41E-02 | ENSMUSG00000024843 |
| Chm      | -0.93154874  | 0.28659782 | 1.15E-03 | 7.44E-03 | ENSMUSG00000025531 |
| Chmp1b   | -0.385184258 | 0.12929465 | 2.89E-03 | 1.54E-02 | ENSMUSG00000109511 |



|         |              |            |          |          |                    |
|---------|--------------|------------|----------|----------|--------------------|
| Chmp2b  | -0.64746172  | 0.15090692 | 1.78E-05 | 2.39E-04 | ENSMUSG00000004843 |
| Chmp5   | -0.348598818 | 0.12796923 | 6.45E-03 | 2.92E-02 | ENSMUSG00000028419 |
| Chordc1 | -0.853020486 | 0.18097846 | 2.44E-06 | 4.39E-05 | ENSMUSG00000001774 |
| Chpf    | 0.547028396  | 0.18747393 | 3.52E-03 | 1.81E-02 | ENSMUSG00000032997 |
| Chpf2   | 0.606625421  | 0.16135145 | 1.70E-04 | 1.54E-03 | ENSMUSG00000038181 |
| Chst12  | 0.605035774  | 0.14608598 | 3.45E-05 | 4.17E-04 | ENSMUSG00000036599 |
| Chst14  | 0.591461935  | 0.17791628 | 8.86E-04 | 6.02E-03 | ENSMUSG00000074916 |
| Churc1  | 1.023177994  | 0.30512984 | 7.99E-04 | 5.54E-03 | ENSMUSG00000090258 |
| Cip2a   | -1.764139469 | 0.63038361 | 5.13E-03 | 2.44E-02 | ENSMUSG00000033031 |
| Cir1    | -1.414924235 | 0.41513944 | 6.54E-04 | 4.68E-03 | ENSMUSG00000041777 |
| Cirbp   | 1.107456814  | 0.18574064 | 2.49E-09 | 1.01E-07 | ENSMUSG00000045193 |
| Cisd3   | 0.878059349  | 0.29370447 | 2.79E-03 | 1.50E-02 | ENSMUSG00000078695 |
| Ckap4   | 0.538604271  | 0.11459957 | 2.60E-06 | 4.65E-05 | ENSMUSG00000046841 |
| Ckb     | 1.479464033  | 0.23453289 | 2.82E-10 | 1.47E-08 | ENSMUSG00000001270 |
| Clcn3   | -1.094677456 | 0.26514359 | 3.65E-05 | 4.37E-04 | ENSMUSG00000004319 |
| Cldn1   | 2.021600548  | 0.46105459 | 1.16E-05 | 1.65E-04 | ENSMUSG00000022512 |
| Cldn10  | 0.890343786  | 0.16915694 | 1.41E-07 | 3.59E-06 | ENSMUSG00000022132 |
| Cldn2   | 2.271299994  | 0.80027195 | 4.54E-03 | 2.21E-02 | ENSMUSG00000047230 |
| Clec11a | 1.316066052  | 0.14487996 | 1.05E-19 | 1.94E-17 | ENSMUSG00000004473 |
| Clec14a | 2.041843613  | 0.77015039 | 8.02E-03 | 3.47E-02 | ENSMUSG00000045930 |
| Clec16a | 1.473885678  | 0.45667713 | 1.25E-03 | 7.93E-03 | ENSMUSG00000068663 |
| Clec4a1 | 1.112170585  | 0.41241977 | 7.00E-03 | 3.13E-02 | ENSMUSG00000049037 |
| Clec4d  | -0.911631549 | 0.19928344 | 4.77E-06 | 7.79E-05 | ENSMUSG00000030144 |
| Clec4e  | -2.460372382 | 0.60204278 | 4.38E-05 | 5.13E-04 | ENSMUSG00000030142 |
| Clip1   | -0.676273094 | 0.23824605 | 4.53E-03 | 2.21E-02 | ENSMUSG00000049550 |
| Clip3   | 0.441540746  | 0.13740877 | 1.31E-03 | 8.22E-03 | ENSMUSG00000013921 |
| Clk1    | -0.747162274 | 0.25523786 | 3.42E-03 | 1.76E-02 | ENSMUSG00000026034 |
| Clk4    | -0.970159992 | 0.24853651 | 9.48E-05 | 9.64E-04 | ENSMUSG00000020385 |
| Clmp    | -0.358126422 | 0.12815289 | 5.20E-03 | 2.47E-02 | ENSMUSG00000032024 |
| Clock   | -1.169962151 | 0.29950845 | 9.37E-05 | 9.54E-04 | ENSMUSG00000029238 |
| Clptm1  | 0.412098133  | 0.13236644 | 1.85E-03 | 1.08E-02 | ENSMUSG00000002981 |
| Clstn1  | 0.826891313  | 0.18450529 | 7.41E-06 | 1.13E-04 | ENSMUSG00000039953 |
| Cltb    | 0.520410132  | 0.11390519 | 4.91E-06 | 7.95E-05 | ENSMUSG00000047547 |
| Cltc    | -0.816945792 | 0.15229603 | 8.13E-08 | 2.21E-06 | ENSMUSG00000047126 |
| Clu     | -0.770741416 | 0.17010859 | 5.87E-06 | 9.27E-05 | ENSMUSG00000022037 |
| Clybl   | 0.417742229  | 0.16045673 | 9.23E-03 | 3.87E-02 | ENSMUSG00000025545 |
| Cmc2    | 0.430059265  | 0.17282283 | 1.28E-02 | 4.98E-02 | ENSMUSG00000014633 |
| Cmklr1  | 1.98630403   | 0.32721806 | 1.28E-09 | 5.57E-08 | ENSMUSG00000042190 |
| Cmtm3   | 0.519074557  | 0.1416076  | 2.47E-04 | 2.10E-03 | ENSMUSG00000031875 |
| Cmtm8   | -0.619506046 | 0.24217676 | 1.05E-02 | 4.28E-02 | ENSMUSG00000041012 |
| Cnbp    | -0.580307147 | 0.12263602 | 2.22E-06 | 4.07E-05 | ENSMUSG00000030057 |
| Cnih1   | -0.259252716 | 0.10415495 | 1.28E-02 | 4.97E-02 | ENSMUSG00000015759 |
| Cnn2    | 1.000291524  | 0.12595958 | 2.00E-15 | 2.25E-13 | ENSMUSG00000004665 |

|         |              |            |          |          |                    |
|---------|--------------|------------|----------|----------|--------------------|
| Cnot6   | -0.932238413 | 0.20819659 | 7.55E-06 | 1.15E-04 | ENSMUSG00000020362 |
| Cnot6l  | -1.085135162 | 0.23174707 | 2.84E-06 | 5.00E-05 | ENSMUSG00000034724 |
| Cnot7   | -0.80926142  | 0.20384395 | 7.19E-05 | 7.73E-04 | ENSMUSG00000031601 |
| Cnp     | 1.461525128  | 0.23792977 | 8.11E-10 | 3.76E-08 | ENSMUSG00000006782 |
| Cnppd1  | 0.404754873  | 0.13917153 | 3.63E-03 | 1.85E-02 | ENSMUSG00000033159 |
| Cnpy2   | 0.679431375  | 0.12039181 | 1.67E-08 | 5.53E-07 | ENSMUSG00000025381 |
| Cntnap1 | 2.126917116  | 0.81286469 | 8.88E-03 | 3.75E-02 | ENSMUSG00000017167 |
| Coa3    | 0.388032413  | 0.11681944 | 8.95E-04 | 6.07E-03 | ENSMUSG00000017188 |
| Cog1    | 0.711513982  | 0.26501515 | 7.26E-03 | 3.21E-02 | ENSMUSG00000018661 |
| Cog5    | -0.946718938 | 0.36416883 | 9.33E-03 | 3.90E-02 | ENSMUSG00000035933 |
| Col13a1 | 4.179529271  | 0.58332819 | 7.78E-13 | 6.44E-11 | ENSMUSG00000058806 |
| Col16a1 | 0.613468721  | 0.1776017  | 5.52E-04 | 4.07E-03 | ENSMUSG00000040690 |
| Col1a1  | 0.926178598  | 0.11037903 | 4.82E-17 | 6.55E-15 | ENSMUSG00000001506 |
| Col1a2  | 0.873752356  | 0.11247272 | 7.94E-15 | 8.36E-13 | ENSMUSG00000029661 |
| Col22a1 | 1.041286061  | 0.34115322 | 2.27E-03 | 1.27E-02 | ENSMUSG00000079022 |
| Col27a1 | 0.56180362   | 0.15571394 | 3.09E-04 | 2.52E-03 | ENSMUSG00000045672 |
| Col2a1  | 0.518287371  | 0.13746852 | 1.63E-04 | 1.49E-03 | ENSMUSG00000022483 |
| Col3a1  | 0.722320394  | 0.13265668 | 5.18E-08 | 1.49E-06 | ENSMUSG00000026043 |
| Col4a1  | 0.927174318  | 0.13465176 | 5.75E-12 | 4.18E-10 | ENSMUSG00000031502 |
| Col4a2  | 0.838761068  | 0.14749885 | 1.30E-08 | 4.48E-07 | ENSMUSG00000031503 |
| Col5a1  | 1.285257246  | 0.11592663 | 1.45E-28 | 7.06E-26 | ENSMUSG00000026837 |
| Col5a2  | 0.52767595   | 0.10052805 | 1.53E-07 | 3.84E-06 | ENSMUSG00000026042 |
| Col6a2  | 0.691056743  | 0.16053177 | 1.67E-05 | 2.26E-04 | ENSMUSG00000020241 |
| Col6a3  | 0.713202742  | 0.13740395 | 2.10E-07 | 5.06E-06 | ENSMUSG00000048126 |
| Col8a2  | 1.34828467   | 0.18749975 | 6.44E-13 | 5.43E-11 | ENSMUSG00000056174 |
| Col9a1  | -0.526253721 | 0.1751098  | 2.65E-03 | 1.44E-02 | ENSMUSG00000026147 |
| Comp    | 0.641947041  | 0.18973851 | 7.16E-04 | 5.05E-03 | ENSMUSG00000031849 |
| Cop1    | -1.035604437 | 0.22676374 | 4.95E-06 | 8.02E-05 | ENSMUSG00000040782 |
| Copb1   | -0.627996836 | 0.25040885 | 1.21E-02 | 4.78E-02 | ENSMUSG00000030754 |
| Copb2   | -0.572208283 | 0.12572212 | 5.33E-06 | 8.50E-05 | ENSMUSG00000032458 |
| Cops2   | -1.148202527 | 0.19745603 | 6.06E-09 | 2.23E-07 | ENSMUSG00000027206 |
| Cops4   | -0.440929399 | 0.15365457 | 4.11E-03 | 2.04E-02 | ENSMUSG00000035297 |
| Cops7a  | 0.543942657  | 0.21777096 | 1.25E-02 | 4.88E-02 | ENSMUSG00000030127 |
| Copz1   | -0.314263468 | 0.10660932 | 3.20E-03 | 1.67E-02 | ENSMUSG00000060992 |
| Copz2   | 0.562929104  | 0.16659791 | 7.28E-04 | 5.12E-03 | ENSMUSG00000018672 |
| Coq10b  | -1.061829229 | 0.26387061 | 5.72E-05 | 6.40E-04 | ENSMUSG00000025981 |
| Coq5    | -0.895697198 | 0.24642234 | 2.78E-04 | 2.31E-03 | ENSMUSG00000041733 |
| Coq8a   | 1.000568665  | 0.38233943 | 8.87E-03 | 3.75E-02 | ENSMUSG00000026489 |
| Coro1c  | 0.461708697  | 0.18157935 | 1.10E-02 | 4.43E-02 | ENSMUSG00000004530 |
| Cotl1   | 0.579246002  | 0.15863765 | 2.61E-04 | 2.19E-03 | ENSMUSG00000031827 |
| Cox15   | 0.510873383  | 0.16359574 | 1.79E-03 | 1.05E-02 | ENSMUSG00000040018 |
| Cox20   | 0.760147613  | 0.12182096 | 4.38E-10 | 2.18E-08 | ENSMUSG00000026500 |
| Cox5b   | 0.534959714  | 0.1832375  | 3.51E-03 | 1.80E-02 | ENSMUSG00000061518 |

|            |              |            |          |          |                    |
|------------|--------------|------------|----------|----------|--------------------|
| Cox7a1     | 1.042981616  | 0.29038767 | 3.29E-04 | 2.66E-03 | ENSMUSG00000074218 |
| Cox7a2l    | -0.640633047 | 0.10917725 | 4.42E-09 | 1.68E-07 | ENSMUSG00000024248 |
| Cpa6       | 1.839244843  | 0.39139577 | 2.61E-06 | 4.66E-05 | ENSMUSG00000042501 |
| Cpne2      | -0.416967495 | 0.14447117 | 3.90E-03 | 1.96E-02 | ENSMUSG00000034361 |
| Cpox       | -0.669034895 | 0.18674953 | 3.40E-04 | 2.73E-03 | ENSMUSG00000022742 |
| Cpq        | 1.072465906  | 0.16246188 | 4.07E-11 | 2.62E-09 | ENSMUSG00000039007 |
| Cpsf6      | -0.614617191 | 0.18497775 | 8.92E-04 | 6.06E-03 | ENSMUSG00000055531 |
| Cpt1c      | 0.887647591  | 0.21425255 | 3.43E-05 | 4.15E-04 | ENSMUSG00000007783 |
| Cptp       | 0.94153718   | 0.28531096 | 9.67E-04 | 6.44E-03 | ENSMUSG00000029073 |
| Cr1l       | 0.539055075  | 0.13677154 | 8.10E-05 | 8.49E-04 | ENSMUSG00000016481 |
| Crat       | 0.710955931  | 0.20521047 | 5.31E-04 | 3.94E-03 | ENSMUSG00000026853 |
| Crcp       | -0.512176893 | 0.1897223  | 6.94E-03 | 3.11E-02 | ENSMUSG00000025532 |
| Creb1      | -0.574996322 | 0.18171228 | 1.55E-03 | 9.37E-03 | ENSMUSG00000025958 |
| Creb3l1    | 1.096894428  | 0.12207472 | 2.58E-19 | 4.58E-17 | ENSMUSG00000027230 |
| Crebrf     | -0.761700597 | 0.18906251 | 5.61E-05 | 6.30E-04 | ENSMUSG00000048249 |
| Cript      | -0.496051326 | 0.15698434 | 1.58E-03 | 9.49E-03 | ENSMUSG00000024146 |
| Crispld2   | 0.658898617  | 0.14120952 | 3.07E-06 | 5.33E-05 | ENSMUSG00000031825 |
| Crls1      | -0.750957647 | 0.16055963 | 2.91E-06 | 5.10E-05 | ENSMUSG00000027357 |
| Crnk1l     | -1.148233703 | 0.32427832 | 3.99E-04 | 3.12E-03 | ENSMUSG00000001767 |
| Crtap      | 0.753366301  | 0.20745571 | 2.82E-04 | 2.33E-03 | ENSMUSG00000032431 |
| Cryab      | -0.445406199 | 0.15142223 | 3.27E-03 | 1.70E-02 | ENSMUSG00000032060 |
| Cryba4     | 2.896916128  | 0.5435477  | 9.84E-08 | 2.59E-06 | ENSMUSG00000066975 |
| Crybb1     | 2.905165935  | 0.42826165 | 1.17E-11 | 8.16E-10 | ENSMUSG00000029343 |
| Cryl1      | 0.910817737  | 0.34208798 | 7.76E-03 | 3.38E-02 | ENSMUSG00000021947 |
| Cryz       | 0.856843798  | 0.19365777 | 9.67E-06 | 1.40E-04 | ENSMUSG00000028199 |
| Cryzl1     | -0.461550842 | 0.17663739 | 8.98E-03 | 3.78E-02 | ENSMUSG00000058240 |
| Csad       | 0.54790078   | 0.14923858 | 2.41E-04 | 2.06E-03 | ENSMUSG00000023044 |
| Csde1      | -0.9748679   | 0.18555867 | 1.49E-07 | 3.77E-06 | ENSMUSG00000068823 |
| Cse1l      | -0.801482692 | 0.29946022 | 7.44E-03 | 3.28E-02 | ENSMUSG00000002718 |
| Csf1r      | 0.951404924  | 0.30179817 | 1.62E-03 | 9.69E-03 | ENSMUSG00000024621 |
| Csf2ra     | 0.441003933  | 0.15421083 | 4.24E-03 | 2.10E-02 | ENSMUSG00000059326 |
| Csgalnact1 | -0.79247479  | 0.26449152 | 2.73E-03 | 1.47E-02 | ENSMUSG00000036356 |
| Csgalnact2 | -1.019172031 | 0.22075279 | 3.90E-06 | 6.54E-05 | ENSMUSG00000042042 |
| Csnk1a1    | -0.399971555 | 0.12111065 | 9.58E-04 | 6.39E-03 | ENSMUSG00000024576 |
| Csnk1e     | -0.57635348  | 0.16717348 | 5.66E-04 | 4.15E-03 | ENSMUSG00000022433 |
| Csnk2a1    | -0.472597471 | 0.15734097 | 2.67E-03 | 1.45E-02 | ENSMUSG00000074698 |
| Cspg4      | 1.187834193  | 0.24308948 | 1.03E-06 | 2.08E-05 | ENSMUSG00000032911 |
| Cst3       | 0.487911649  | 0.1012198  | 1.43E-06 | 2.76E-05 | ENSMUSG00000027447 |
| Ctbp1      | 0.385009347  | 0.13743782 | 5.09E-03 | 2.43E-02 | ENSMUSG00000037373 |
| Ctdsp1     | 0.730467164  | 0.19281679 | 1.52E-04 | 1.40E-03 | ENSMUSG00000026176 |
| Ctdsp2     | 0.391109508  | 0.11812824 | 9.30E-04 | 6.27E-03 | ENSMUSG00000078429 |
| Ctdspl     | 0.450794803  | 0.17781085 | 1.12E-02 | 4.50E-02 | ENSMUSG00000047409 |
| Ctf1       | 2.321013971  | 0.74632808 | 1.87E-03 | 1.09E-02 | ENSMUSG00000042340 |

|               |              |            |          |          |                    |
|---------------|--------------|------------|----------|----------|--------------------|
| Cth           | -0.841732925 | 0.24000806 | 4.53E-04 | 3.46E-03 | ENSMUSG00000028179 |
| Cthrc1        | 0.671305087  | 0.24168398 | 5.48E-03 | 2.57E-02 | ENSMUSG00000054196 |
| Ctla2a        | -0.421898506 | 0.1217141  | 5.28E-04 | 3.92E-03 | ENSMUSG00000044258 |
| Ctnnbip1      | 0.599744362  | 0.13891685 | 1.58E-05 | 2.16E-04 | ENSMUSG00000028988 |
| Ctnnd1        | 0.705457835  | 0.17227276 | 4.22E-05 | 4.98E-04 | ENSMUSG00000034101 |
| Ctps          | -0.57550199  | 0.16886216 | 6.54E-04 | 4.68E-03 | ENSMUSG00000028633 |
| Ctsa          | 0.519646658  | 0.10160892 | 3.15E-07 | 7.24E-06 | ENSMUSG00000017760 |
| Ctsd          | 0.555764302  | 0.11531767 | 1.44E-06 | 2.77E-05 | ENSMUSG00000007891 |
| Ctsk          | 0.716087574  | 0.1158157  | 6.29E-10 | 3.02E-08 | ENSMUSG00000028111 |
| Ctsl          | -0.426912127 | 0.11526139 | 2.12E-04 | 1.85E-03 | ENSMUSG00000021477 |
| Ctss          | -0.665254313 | 0.22031903 | 2.53E-03 | 1.39E-02 | ENSMUSG00000038642 |
| Cuedc1        | 0.567263613  | 0.19441838 | 3.53E-03 | 1.81E-02 | ENSMUSG00000018378 |
| Cuedc2        | 0.560763308  | 0.14401075 | 9.86E-05 | 9.92E-04 | ENSMUSG00000036748 |
| Cul2          | -1.172654405 | 0.40308964 | 3.62E-03 | 1.85E-02 | ENSMUSG00000024231 |
| Cul3          | -1.131992531 | 0.21234863 | 9.78E-08 | 2.58E-06 | ENSMUSG00000004364 |
| Cul4b         | -1.424105623 | 0.29371374 | 1.24E-06 | 2.44E-05 | ENSMUSG00000031095 |
| Cul5          | -0.986978325 | 0.26347626 | 1.80E-04 | 1.61E-03 | ENSMUSG00000032030 |
| Cuta          | 0.487724698  | 0.136509   | 3.53E-04 | 2.81E-03 | ENSMUSG00000024194 |
| Cwc15         | -0.312975108 | 0.12260717 | 1.07E-02 | 4.34E-02 | ENSMUSG00000004096 |
| Cwc27         | -1.263671267 | 0.47703485 | 8.07E-03 | 3.48E-02 | ENSMUSG00000021715 |
| Cwf19l2       | -1.049014951 | 0.21989077 | 1.84E-06 | 3.46E-05 | ENSMUSG00000025898 |
| Cx3cr1        | -0.834230574 | 0.26406342 | 1.58E-03 | 9.50E-03 | ENSMUSG00000052336 |
| Cxadr         | -2.423597593 | 0.74871583 | 1.21E-03 | 7.74E-03 | ENSMUSG00000022865 |
| Cxcl1         | -2.578071417 | 0.3614838  | 9.90E-13 | 7.99E-11 | ENSMUSG00000029380 |
| Cxcl12        | 1.798047335  | 0.18650646 | 5.38E-22 | 1.29E-19 | ENSMUSG00000061353 |
| Cxcl14        | -0.679564504 | 0.13959877 | 1.13E-06 | 2.24E-05 | ENSMUSG00000021508 |
| Cxcl2         | -1.8693768   | 0.52307042 | 3.52E-04 | 2.80E-03 | ENSMUSG00000058427 |
| Cxxc5         | 0.691857313  | 0.16943223 | 4.44E-05 | 5.19E-04 | ENSMUSG00000046668 |
| Cyb561        | 0.623734505  | 0.16239832 | 1.23E-04 | 1.18E-03 | ENSMUSG00000019590 |
| Cyb561d2      | 0.866115518  | 0.29268662 | 3.08E-03 | 1.62E-02 | ENSMUSG00000037190 |
| Cyb5rl        | 1.50431284   | 0.30913163 | 1.14E-06 | 2.25E-05 | ENSMUSG00000028621 |
| Cybc1         | 0.3915054    | 0.15564976 | 1.19E-02 | 4.71E-02 | ENSMUSG00000039294 |
| Cyc1          | 0.322566703  | 0.12807959 | 1.18E-02 | 4.67E-02 | ENSMUSG00000022551 |
| Cygb          | 1.021961821  | 0.16622549 | 7.84E-10 | 3.65E-08 | ENSMUSG00000020810 |
| Cyhr1         | 0.542812678  | 0.14231361 | 1.37E-04 | 1.29E-03 | ENSMUSG00000053929 |
| Cyp2d22       | -0.56456324  | 0.17647003 | 1.38E-03 | 8.54E-03 | ENSMUSG00000061740 |
| Cyp2f2        | 1.663594968  | 0.20423035 | 3.77E-16 | 4.64E-14 | ENSMUSG00000052974 |
| Cyren         | 0.675583476  | 0.24194664 | 5.23E-03 | 2.48E-02 | ENSMUSG00000046806 |
| D16Ert472e    | -0.832756105 | 0.22165888 | 1.72E-04 | 1.56E-03 | ENSMUSG00000022864 |
| D17H6S53E     | 0.889367191  | 0.29144496 | 2.28E-03 | 1.27E-02 | ENSMUSG00000043311 |
| D2hgdh        | 1.207580951  | 0.46164671 | 8.90E-03 | 3.76E-02 | ENSMUSG00000073609 |
| D330023K18Rik | 1.227883712  | 0.47617115 | 9.92E-03 | 4.09E-02 | ENSMUSG00000087269 |
| D830050J10Rik | -0.846009689 | 0.20130145 | 2.64E-05 | 3.33E-04 | ENSMUSG00000107176 |

|               |              |            |          |          |                    |
|---------------|--------------|------------|----------|----------|--------------------|
| D930016D06Rik | -0.631623552 | 0.24263197 | 9.24E-03 | 3.87E-02 | ENSMUSG00000097375 |
| Daam1         | -0.871500772 | 0.33196054 | 8.66E-03 | 3.68E-02 | ENSMUSG00000034574 |
| Daam2         | 0.761877549  | 0.29463622 | 9.71E-03 | 4.03E-02 | ENSMUSG00000040260 |
| Dab2ip        | 0.576145245  | 0.22934417 | 1.20E-02 | 4.74E-02 | ENSMUSG00000026883 |
| Dact3         | 0.621382694  | 0.24095567 | 9.91E-03 | 4.09E-02 | ENSMUSG00000078794 |
| Dag1          | 0.711954599  | 0.13502634 | 1.34E-07 | 3.44E-06 | ENSMUSG00000039952 |
| Dap           | 0.295605351  | 0.09902756 | 2.84E-03 | 1.51E-02 | ENSMUSG00000039168 |
| Dbf4          | -1.257680999 | 0.38843586 | 1.20E-03 | 7.73E-03 | ENSMUSG00000002297 |
| Dbnl          | 0.8297724    | 0.13563995 | 9.51E-10 | 4.33E-08 | ENSMUSG00000020476 |
| Dbp           | -0.491809841 | 0.12983406 | 1.52E-04 | 1.41E-03 | ENSMUSG00000059824 |
| Dcaf1         | -1.622628236 | 0.53361714 | 2.36E-03 | 1.31E-02 | ENSMUSG00000040325 |
| Dcaf10        | -0.73069903  | 0.24300101 | 2.64E-03 | 1.43E-02 | ENSMUSG00000035572 |
| Dcaf11        | 0.604548477  | 0.22172871 | 6.40E-03 | 2.91E-02 | ENSMUSG00000022214 |
| Dcaf13        | -0.624173405 | 0.17112592 | 2.65E-04 | 2.22E-03 | ENSMUSG00000022300 |
| Dcaf4         | 0.672908639  | 0.20071778 | 8.01E-04 | 5.55E-03 | ENSMUSG00000021222 |
| Dcaf5         | 0.510174298  | 0.17757789 | 4.07E-03 | 2.02E-02 | ENSMUSG00000049106 |
| Dchs1         | 0.879026665  | 0.25073422 | 4.55E-04 | 3.47E-03 | ENSMUSG00000036862 |
| Dcn           | -0.443058269 | 0.16009331 | 5.65E-03 | 2.64E-02 | ENSMUSG00000019929 |
| Dctn4         | -0.338505873 | 0.1293511  | 8.87E-03 | 3.75E-02 | ENSMUSG00000024603 |
| Dctpp1        | -0.347106743 | 0.13685591 | 1.12E-02 | 4.49E-02 | ENSMUSG00000042462 |
| Dcun1d1       | -0.843965606 | 0.25055939 | 7.56E-04 | 5.30E-03 | ENSMUSG00000027708 |
| Dcxr          | 0.590135676  | 0.14362847 | 3.98E-05 | 4.72E-04 | ENSMUSG00000039450 |
| Ddi2          | -0.536684716 | 0.15289759 | 4.48E-04 | 3.44E-03 | ENSMUSG00000078515 |
| Ddit3         | -0.570889263 | 0.10760309 | 1.12E-07 | 2.93E-06 | ENSMUSG00000025408 |
| Ddit4         | 0.453813547  | 0.10311931 | 1.08E-05 | 1.55E-04 | ENSMUSG00000020108 |
| Ddit4l        | 0.452663614  | 0.11994199 | 1.61E-04 | 1.47E-03 | ENSMUSG00000046818 |
| Ddost         | 0.622263278  | 0.1158707  | 7.86E-08 | 2.14E-06 | ENSMUSG00000028757 |
| Ddr1          | 0.797423282  | 0.20590598 | 1.08E-04 | 1.06E-03 | ENSMUSG00000003534 |
| Ddx1          | -0.675794982 | 0.18235046 | 2.11E-04 | 1.84E-03 | ENSMUSG00000037149 |
| Ddx10         | -1.14737087  | 0.36582993 | 1.71E-03 | 1.01E-02 | ENSMUSG00000053289 |
| Ddx21         | -0.951891051 | 0.20860102 | 5.04E-06 | 8.15E-05 | ENSMUSG00000020075 |
| Ddx3x         | -0.710529939 | 0.18304177 | 1.04E-04 | 1.03E-03 | ENSMUSG00000000787 |
| Ddx3y         | -0.981847981 | 0.22276296 | 1.05E-05 | 1.51E-04 | ENSMUSG00000069045 |
| Ddx41         | 0.462830075  | 0.14458499 | 1.37E-03 | 8.50E-03 | ENSMUSG00000021494 |
| Ddx46         | -0.750182081 | 0.22811183 | 1.01E-03 | 6.64E-03 | ENSMUSG00000021500 |
| Ddx50         | -0.96263096  | 0.21374533 | 6.68E-06 | 1.03E-04 | ENSMUSG00000020076 |
| Ddx52         | -1.086859188 | 0.26745234 | 4.83E-05 | 5.56E-04 | ENSMUSG00000020677 |
| Decr1         | 0.45227065   | 0.12854668 | 4.34E-04 | 3.34E-03 | ENSMUSG00000028223 |
| Def8          | 0.529820771  | 0.13725815 | 1.13E-04 | 1.11E-03 | ENSMUSG00000001482 |
| Dek           | -0.781051783 | 0.24053929 | 1.17E-03 | 7.52E-03 | ENSMUSG00000021377 |
| Dennd1a       | 0.815501261  | 0.219121   | 1.98E-04 | 1.75E-03 | ENSMUSG00000035392 |
| Dennd1b       | -1.146017504 | 0.41693664 | 5.98E-03 | 2.76E-02 | ENSMUSG00000056268 |
| Dennd4a       | -0.801058296 | 0.31413009 | 1.08E-02 | 4.37E-02 | ENSMUSG00000053641 |

|         |              |            |          |          |                    |
|---------|--------------|------------|----------|----------|--------------------|
| Denr    | -0.772775132 | 0.12561788 | 7.66E-10 | 3.58E-08 | ENSMUSG00000023106 |
| Derl2   | 0.4384845    | 0.14186433 | 2.00E-03 | 1.14E-02 | ENSMUSG00000018442 |
| Dexi    | 0.600472795  | 0.23397858 | 1.03E-02 | 4.21E-02 | ENSMUSG00000038055 |
| Dgat1   | 0.512442473  | 0.19357367 | 8.11E-03 | 3.49E-02 | ENSMUSG00000022555 |
| Dgat2   | 1.75004446   | 0.56279189 | 1.87E-03 | 1.09E-02 | ENSMUSG00000030747 |
| Dgcr2   | 0.600983706  | 0.16769067 | 3.39E-04 | 2.73E-03 | ENSMUSG00000003166 |
| Dgkh    | -0.927390759 | 0.26332593 | 4.29E-04 | 3.31E-03 | ENSMUSG00000034731 |
| Dgkz    | 0.698221325  | 0.23080715 | 2.49E-03 | 1.36E-02 | ENSMUSG00000040479 |
| Dhcr24  | 0.64514025   | 0.23649379 | 6.37E-03 | 2.90E-02 | ENSMUSG00000034926 |
| Dhcr7   | 0.926228303  | 0.15305082 | 1.43E-09 | 6.18E-08 | ENSMUSG00000058454 |
| Dhrs1   | 1.294328555  | 0.15489787 | 6.49E-17 | 8.54E-15 | ENSMUSG00000002332 |
| Dhrs3   | 0.745336855  | 0.12711615 | 4.53E-09 | 1.72E-07 | ENSMUSG00000066026 |
| Dhrs4   | 1.112671978  | 0.18209043 | 9.93E-10 | 4.48E-08 | ENSMUSG00000022210 |
| Dhrs9   | -1.395171677 | 0.3914629  | 3.65E-04 | 2.89E-03 | ENSMUSG00000027068 |
| Dhx15   | -0.604359983 | 0.1730922  | 4.80E-04 | 3.62E-03 | ENSMUSG00000029169 |
| Dhx36   | -1.104513567 | 0.26537941 | 3.15E-05 | 3.87E-04 | ENSMUSG00000027770 |
| Dhx40   | -0.610759818 | 0.21567875 | 4.63E-03 | 2.25E-02 | ENSMUSG00000018425 |
| Dhx58   | 1.572521343  | 0.60393974 | 9.22E-03 | 3.86E-02 | ENSMUSG00000017830 |
| Dhx58os | 1.730478702  | 0.31436599 | 3.70E-08 | 1.11E-06 | ENSMUSG00000085604 |
| Dio3    | 2.388593118  | 0.18639292 | 1.35E-37 | 1.37E-34 | ENSMUSG00000075707 |
| Dio3os  | -1.293462114 | 0.46246564 | 5.16E-03 | 2.45E-02 | ENSMUSG00000112843 |
| Dipk1b  | 0.619572125  | 0.1524857  | 4.84E-05 | 5.57E-04 | ENSMUSG00000036186 |
| Dipk1c  | 2.679390092  | 1.06584954 | 1.19E-02 | 4.72E-02 | ENSMUSG00000047992 |
| Dipk2a  | 0.724123841  | 0.23794674 | 2.34E-03 | 1.30E-02 | ENSMUSG00000045414 |
| Dis3    | -0.985436191 | 0.30527303 | 1.25E-03 | 7.93E-03 | ENSMUSG00000033166 |
| Dkc1    | -1.208168631 | 0.22493915 | 7.83E-08 | 2.14E-06 | ENSMUSG00000031403 |
| Dkk3    | 0.950385149  | 0.20312545 | 2.89E-06 | 5.06E-05 | ENSMUSG00000030772 |
| Dld     | -0.793222922 | 0.2621462  | 2.48E-03 | 1.36E-02 | ENSMUSG00000020664 |
| Dlg1    | -0.663080754 | 0.20478407 | 1.20E-03 | 7.73E-03 | ENSMUSG00000022770 |
| Dlg5    | 0.472697644  | 0.16139558 | 3.40E-03 | 1.76E-02 | ENSMUSG00000021782 |
| Dlgap4  | 0.515867349  | 0.13385915 | 1.16E-04 | 1.13E-03 | ENSMUSG00000061689 |
| Dlk2    | 3.021880041  | 0.55030845 | 3.99E-08 | 1.19E-06 | ENSMUSG00000047428 |
| Dlx3    | 2.756792994  | 0.65203217 | 2.36E-05 | 3.02E-04 | ENSMUSG00000001510 |
| Dlx5    | 1.576283601  | 0.25230747 | 4.17E-10 | 2.10E-08 | ENSMUSG00000029755 |
| Dmac1   | 0.395399538  | 0.12420206 | 1.45E-03 | 8.89E-03 | ENSMUSG00000028398 |
| Dmpk    | 1.545231878  | 0.16141741 | 1.04E-21 | 2.36E-19 | ENSMUSG00000030409 |
| Dmtf1   | -0.973873568 | 0.31082364 | 1.73E-03 | 1.02E-02 | ENSMUSG00000042508 |
| Dmwd    | 0.48998797   | 0.19399759 | 1.15E-02 | 4.59E-02 | ENSMUSG00000030410 |
| Dnaja2  | -0.54805173  | 0.13525427 | 5.08E-05 | 5.79E-04 | ENSMUSG00000031701 |
| Dnajb4  | -0.765147703 | 0.24811298 | 2.04E-03 | 1.16E-02 | ENSMUSG00000028035 |
| Dnajb5  | 1.536544641  | 0.55529541 | 5.66E-03 | 2.64E-02 | ENSMUSG00000036052 |
| Dnajb6  | -0.437051892 | 0.15985149 | 6.25E-03 | 2.85E-02 | ENSMUSG00000029131 |
| Dnajc1  | -0.495470116 | 0.17446777 | 4.51E-03 | 2.20E-02 | ENSMUSG00000026740 |

|          |              |            |          |          |                    |
|----------|--------------|------------|----------|----------|--------------------|
| Dnajc12  | 1.517430052  | 0.46114378 | 1.00E-03 | 6.60E-03 | ENSMUSG00000036764 |
| Dnajc2   | -1.227220461 | 0.25178032 | 1.09E-06 | 2.18E-05 | ENSMUSG00000029014 |
| Dnajc30  | 0.676266551  | 0.20383835 | 9.08E-04 | 6.15E-03 | ENSMUSG00000061118 |
| Dnajc8   | -0.430552659 | 0.11189998 | 1.19E-04 | 1.16E-03 | ENSMUSG00000054405 |
| Dnase1l1 | 1.085379249  | 0.36758869 | 3.15E-03 | 1.65E-02 | ENSMUSG00000019088 |
| Dnase2a  | 0.796040215  | 0.24238433 | 1.02E-03 | 6.71E-03 | ENSMUSG00000003812 |
| Dnlz     | 0.539453211  | 0.13122535 | 3.94E-05 | 4.68E-04 | ENSMUSG00000075467 |
| Dnm1l    | -1.063968006 | 0.34272317 | 1.91E-03 | 1.10E-02 | ENSMUSG00000022789 |
| Dnpep    | 0.518312796  | 0.14301319 | 2.90E-04 | 2.39E-03 | ENSMUSG00000026209 |
| Dnttip2  | -1.427006266 | 0.31045369 | 4.30E-06 | 7.12E-05 | ENSMUSG00000039756 |
| Dock10   | -1.653867243 | 0.4392987  | 1.67E-04 | 1.52E-03 | ENSMUSG00000038608 |
| Dock6    | 0.872455011  | 0.27796283 | 1.70E-03 | 1.01E-02 | ENSMUSG00000032198 |
| Dok5     | 1.084896578  | 0.3309645  | 1.05E-03 | 6.85E-03 | ENSMUSG00000027560 |
| Dolk     | 0.963893013  | 0.25830762 | 1.90E-04 | 1.69E-03 | ENSMUSG00000075419 |
| Dolpp1   | 1.202583397  | 0.26467046 | 5.53E-06 | 8.78E-05 | ENSMUSG00000026856 |
| Dpep1    | 1.093413913  | 0.11316245 | 4.36E-22 | 1.06E-19 | ENSMUSG00000019278 |
| Dpf1     | 1.60948067   | 0.59948616 | 7.26E-03 | 3.21E-02 | ENSMUSG00000030584 |
| Dpp3     | 0.563723978  | 0.1313116  | 1.76E-05 | 2.37E-04 | ENSMUSG00000063904 |
| Dpp7     | 0.661603894  | 0.16206681 | 4.46E-05 | 5.21E-04 | ENSMUSG00000026958 |
| Dst      | -0.89202535  | 0.23401366 | 1.38E-04 | 1.30E-03 | ENSMUSG00000026131 |
| Dtwd2    | 1.66625232   | 0.61262368 | 6.53E-03 | 2.95E-02 | ENSMUSG00000024505 |
| Dtx2     | 0.741164688  | 0.25399051 | 3.52E-03 | 1.81E-02 | ENSMUSG00000004947 |
| Dus4l    | -1.925023828 | 0.76187616 | 1.15E-02 | 4.58E-02 | ENSMUSG00000020648 |
| Dusp1    | 0.357117127  | 0.1407274  | 1.12E-02 | 4.48E-02 | ENSMUSG00000024190 |
| Dusp11   | -0.602287244 | 0.19176483 | 1.69E-03 | 1.00E-02 | ENSMUSG00000030002 |
| Dusp12   | -0.624482811 | 0.17611184 | 3.91E-04 | 3.06E-03 | ENSMUSG00000026659 |
| Dusp14   | 0.865378623  | 0.20448332 | 2.32E-05 | 2.97E-04 | ENSMUSG00000018648 |
| Dusp23   | 0.684883943  | 0.25413029 | 7.04E-03 | 3.14E-02 | ENSMUSG00000026544 |
| Dusp4    | -1.534119248 | 0.52416272 | 3.42E-03 | 1.76E-02 | ENSMUSG00000031530 |
| Dusp6    | -0.536618242 | 0.18213384 | 3.22E-03 | 1.68E-02 | ENSMUSG00000019960 |
| Dut      | -1.242289564 | 0.14419616 | 6.98E-18 | 1.06E-15 | ENSMUSG00000027203 |
| Dync1i1  | 1.426879282  | 0.37661304 | 1.51E-04 | 1.40E-03 | ENSMUSG00000029757 |
| Dync1i2  | -0.386054718 | 0.13653973 | 4.69E-03 | 2.28E-02 | ENSMUSG00000027012 |
| Dync2li1 | 0.750572974  | 0.25103684 | 2.79E-03 | 1.50E-02 | ENSMUSG00000024253 |
| Dynll1   | 0.684853793  | 0.14432104 | 2.08E-06 | 3.85E-05 | ENSMUSG00000009013 |
| Dynlrb2  | 2.807806788  | 0.84368672 | 8.75E-04 | 5.96E-03 | ENSMUSG00000034467 |
| Dysf     | 0.887335965  | 0.21084222 | 2.57E-05 | 3.25E-04 | ENSMUSG00000033788 |
| Dzip3    | -1.330492732 | 0.45605901 | 3.53E-03 | 1.81E-02 | ENSMUSG00000064061 |
| Ebna1bp2 | -0.504244081 | 0.12961593 | 1.00E-04 | 1.00E-03 | ENSMUSG00000028729 |
| Ebp      | 0.427405122  | 0.12435705 | 5.88E-04 | 4.29E-03 | ENSMUSG00000031168 |
| Ebpl     | 0.836247761  | 0.13110776 | 1.79E-10 | 9.70E-09 | ENSMUSG00000021928 |
| Ece1     | 0.478091832  | 0.15925119 | 2.68E-03 | 1.45E-02 | ENSMUSG00000057530 |
| Echdc1   | -0.799425067 | 0.24850501 | 1.30E-03 | 8.15E-03 | ENSMUSG00000019883 |

|           |              |            |          |          |                    |
|-----------|--------------|------------|----------|----------|--------------------|
| Edem1     | 0.441208011  | 0.16398562 | 7.13E-03 | 3.17E-02 | ENSMUSG00000030104 |
| Edem2     | 0.735685829  | 0.24608948 | 2.79E-03 | 1.50E-02 | ENSMUSG00000038312 |
| Eea1      | -0.960526241 | 0.30073261 | 1.40E-03 | 8.65E-03 | ENSMUSG00000036499 |
| Eed       | -0.810630347 | 0.21933388 | 2.19E-04 | 1.90E-03 | ENSMUSG00000030619 |
| Eef1akmt1 | 0.970097562  | 0.1479494  | 5.49E-11 | 3.39E-09 | ENSMUSG00000021951 |
| Eef1b2    | -0.502093571 | 0.11219106 | 7.63E-06 | 1.16E-04 | ENSMUSG00000025967 |
| Eef1e1    | -0.736625445 | 0.19275458 | 1.33E-04 | 1.26E-03 | ENSMUSG00000001707 |
| Eef1g     | -0.408300566 | 0.13138387 | 1.89E-03 | 1.09E-02 | ENSMUSG00000071644 |
| Eepd1     | 1.160951008  | 0.28577465 | 4.86E-05 | 5.57E-04 | ENSMUSG00000036611 |
| Efemp2    | 0.549342779  | 0.13784962 | 6.75E-05 | 7.34E-04 | ENSMUSG00000024909 |
| Efna2     | 1.044464647  | 0.23554417 | 9.24E-06 | 1.35E-04 | ENSMUSG00000003070 |
| Efnb1     | 1.407602735  | 0.14500357 | 2.80E-22 | 7.10E-20 | ENSMUSG00000031217 |
| Efr3a     | -0.608485364 | 0.20723959 | 3.32E-03 | 1.72E-02 | ENSMUSG00000015002 |
| Egln1     | 0.932989625  | 0.15774397 | 3.33E-09 | 1.31E-07 | ENSMUSG00000031987 |
| Egln2     | 0.640836759  | 0.18227032 | 4.38E-04 | 3.37E-03 | ENSMUSG00000058709 |
| Ehd2      | 0.860251485  | 0.14343558 | 2.00E-09 | 8.27E-08 | ENSMUSG00000074364 |
| Ehd3      | 1.098753894  | 0.1603653  | 7.30E-12 | 5.17E-10 | ENSMUSG00000024065 |
| Eid2b     | 0.912507298  | 0.28347094 | 1.29E-03 | 8.10E-03 | ENSMUSG00000070705 |
| Eif1      | -0.442413786 | 0.12046096 | 2.40E-04 | 2.05E-03 | ENSMUSG00000035530 |
| Eif1a     | -1.282653879 | 0.15633671 | 2.32E-16 | 2.93E-14 | ENSMUSG00000057561 |
| Eif1ad    | -0.37755042  | 0.1442379  | 8.86E-03 | 3.75E-02 | ENSMUSG00000024841 |
| Eif1ax    | -0.342025673 | 0.12147987 | 4.87E-03 | 2.35E-02 | ENSMUSG00000067194 |
| Eif1b     | 0.502805235  | 0.11916595 | 2.45E-05 | 3.12E-04 | ENSMUSG00000006941 |
| Eif2a     | -1.059231627 | 0.26532787 | 6.55E-05 | 7.16E-04 | ENSMUSG00000027810 |
| Eif2ak4   | -0.865833629 | 0.297312   | 3.59E-03 | 1.83E-02 | ENSMUSG00000005102 |
| Eif2b3    | -0.583571936 | 0.20507516 | 4.43E-03 | 2.17E-02 | ENSMUSG00000028683 |
| Eif2s1    | -0.772088715 | 0.17273947 | 7.83E-06 | 1.18E-04 | ENSMUSG00000021116 |
| Eif2s2    | -1.400354296 | 0.42363264 | 9.48E-04 | 6.34E-03 | ENSMUSG00000074656 |
| Eif2s3y   | -1.634796823 | 0.24449334 | 2.29E-11 | 1.50E-09 | ENSMUSG00000069049 |
| Eif3a     | -1.397641572 | 0.41195194 | 6.92E-04 | 4.89E-03 | ENSMUSG00000024991 |
| Eif3c     | -0.432115089 | 0.12123408 | 3.65E-04 | 2.89E-03 | ENSMUSG00000030738 |
| Eif3d     | -0.360416472 | 0.11252027 | 1.36E-03 | 8.45E-03 | ENSMUSG00000016554 |
| Eif3e     | -1.024185788 | 0.16463298 | 4.94E-10 | 2.44E-08 | ENSMUSG00000022336 |
| Eif3f     | -0.397030423 | 0.1070903  | 2.09E-04 | 1.83E-03 | ENSMUSG00000031029 |
| Eif3g     | -0.325479621 | 0.11631108 | 5.14E-03 | 2.44E-02 | ENSMUSG00000070319 |
| Eif3h     | -0.47701311  | 0.12066725 | 7.71E-05 | 8.16E-04 | ENSMUSG00000022312 |
| Eif3m     | -0.768933935 | 0.20145174 | 1.35E-04 | 1.28E-03 | ENSMUSG00000027170 |
| Eif4a2    | -0.707568586 | 0.26478674 | 7.54E-03 | 3.31E-02 | ENSMUSG00000022884 |
| Eif4b     | -0.508430603 | 0.1251353  | 4.84E-05 | 5.57E-04 | ENSMUSG00000058655 |
| Eif4e     | -0.582224225 | 0.16003632 | 2.75E-04 | 2.29E-03 | ENSMUSG00000028156 |
| Eif4ebp1  | -0.665637816 | 0.14080738 | 2.28E-06 | 4.16E-05 | ENSMUSG00000031490 |
| Eif4g2    | -0.442911053 | 0.12336109 | 3.30E-04 | 2.67E-03 | ENSMUSG00000005610 |
| Eif5      | -0.883500941 | 0.18619313 | 2.08E-06 | 3.85E-05 | ENSMUSG00000021282 |



|            |              |            |          |          |                    |
|------------|--------------|------------|----------|----------|--------------------|
| Eif5b      | -1.292259734 | 0.45088924 | 4.16E-03 | 2.06E-02 | ENSMUSG00000026083 |
| Elk1       | 0.721299865  | 0.16029837 | 6.80E-06 | 1.05E-04 | ENSMUSG00000009406 |
| Ell2       | -1.20248479  | 0.16426667 | 2.47E-13 | 2.23E-11 | ENSMUSG00000001542 |
| Eln        | -0.95814797  | 0.3127319  | 2.19E-03 | 1.23E-02 | ENSMUSG00000029675 |
| Eloc       | -0.564955731 | 0.13986305 | 5.36E-05 | 6.08E-04 | ENSMUSG00000079658 |
| Elof1      | 0.384123248  | 0.12541419 | 2.19E-03 | 1.23E-02 | ENSMUSG00000013822 |
| Elov1      | 0.430161659  | 0.13267032 | 1.19E-03 | 7.63E-03 | ENSMUSG00000006390 |
| Elov15     | -0.384437967 | 0.13665379 | 4.90E-03 | 2.36E-02 | ENSMUSG00000032349 |
| Emb        | -0.362804033 | 0.11392237 | 1.45E-03 | 8.88E-03 | ENSMUSG00000021728 |
| Emc10      | 0.855065666  | 0.14786154 | 7.34E-09 | 2.66E-07 | ENSMUSG00000008140 |
| Emc2       | -0.59462494  | 0.20646152 | 3.98E-03 | 1.98E-02 | ENSMUSG00000022337 |
| Emc8       | 0.344957335  | 0.13409392 | 1.01E-02 | 4.15E-02 | ENSMUSG00000031819 |
| Emc9       | 0.904534544  | 0.31106324 | 3.64E-03 | 1.85E-02 | ENSMUSG00000022217 |
| Eme2       | 1.505708061  | 0.48304853 | 1.83E-03 | 1.07E-02 | ENSMUSG00000073436 |
| Emilin1    | 1.902793791  | 0.20434801 | 1.26E-20 | 2.48E-18 | ENSMUSG00000029163 |
| Emilin2    | 0.507133658  | 0.19206135 | 8.28E-03 | 3.55E-02 | ENSMUSG00000024053 |
| Eml3       | 0.827957028  | 0.16373749 | 4.27E-07 | 9.52E-06 | ENSMUSG00000071647 |
| Emp3       | 0.936244066  | 0.11347764 | 1.58E-16 | 2.02E-14 | ENSMUSG00000040212 |
| Emsy       | -0.749172076 | 0.26802891 | 5.19E-03 | 2.46E-02 | ENSMUSG00000035401 |
| Endov      | 1.505211343  | 0.39482263 | 1.38E-04 | 1.30E-03 | ENSMUSG00000039850 |
| Eng        | 0.901538297  | 0.23487205 | 1.24E-04 | 1.19E-03 | ENSMUSG00000026814 |
| Engase     | 1.263726693  | 0.20894789 | 1.47E-09 | 6.31E-08 | ENSMUSG00000033857 |
| Enho       | 1.351789863  | 0.28873272 | 2.84E-06 | 5.00E-05 | ENSMUSG00000028445 |
| Eno1       | 0.899314704  | 0.26314669 | 6.32E-04 | 4.54E-03 | ENSMUSG00000063524 |
| Entpd3     | 1.834829978  | 0.44981846 | 4.52E-05 | 5.27E-04 | ENSMUSG00000041608 |
| Epb41      | -0.807673348 | 0.29663728 | 6.47E-03 | 2.93E-02 | ENSMUSG00000028906 |
| Epb4113    | -0.681244314 | 0.23611001 | 3.91E-03 | 1.96E-02 | ENSMUSG00000024044 |
| Epb4114aos | -1.365210806 | 0.13883581 | 8.09E-23 | 2.32E-20 | ENSMUSG00000087590 |
| Epha8      | 3.877720425  | 1.07081734 | 2.93E-04 | 2.41E-03 | ENSMUSG00000028661 |
| Ephb2      | 1.47842278   | 0.25874711 | 1.10E-08 | 3.89E-07 | ENSMUSG00000028664 |
| Ephb3      | 1.019041761  | 0.28447923 | 3.41E-04 | 2.74E-03 | ENSMUSG00000005958 |
| Ephb6      | 1.959044911  | 0.52976859 | 2.17E-04 | 1.89E-03 | ENSMUSG00000029869 |
| Ephx2      | 1.110026818  | 0.33889773 | 1.06E-03 | 6.90E-03 | ENSMUSG00000022040 |
| Epn2       | -0.448438135 | 0.14811035 | 2.46E-03 | 1.36E-02 | ENSMUSG00000001036 |
| Eprs       | -1.166656824 | 0.4267083  | 6.26E-03 | 2.85E-02 | ENSMUSG00000026615 |
| Ercc8      | -0.929798145 | 0.29413651 | 1.57E-03 | 9.46E-03 | ENSMUSG00000021694 |
| Erg28      | 0.891116734  | 0.15089101 | 3.51E-09 | 1.36E-07 | ENSMUSG00000021252 |
| Ergic2     | -0.68796187  | 0.21568346 | 1.42E-03 | 8.76E-03 | ENSMUSG00000030304 |
| Ergic3     | 0.482387661  | 0.10435359 | 3.79E-06 | 6.41E-05 | ENSMUSG00000005881 |
| Eri1       | -0.571539014 | 0.19989129 | 4.25E-03 | 2.10E-02 | ENSMUSG00000031527 |
| Erlin2     | 0.868401134  | 0.27431703 | 1.55E-03 | 9.35E-03 | ENSMUSG00000031483 |
| Ern1       | -0.71867351  | 0.18490442 | 1.02E-04 | 1.01E-03 | ENSMUSG00000020715 |
| Erp29      | 0.427894524  | 0.12650413 | 7.18E-04 | 5.06E-03 | ENSMUSG00000029616 |

|           |              |            |          |          |                    |
|-----------|--------------|------------|----------|----------|--------------------|
| Erp44     | -0.359459062 | 0.13356414 | 7.12E-03 | 3.17E-02 | ENSMUSG00000028343 |
| Esd       | -0.962741844 | 0.11795867 | 3.30E-16 | 4.10E-14 | ENSMUSG00000021996 |
| Esf1      | -1.628697168 | 0.25237717 | 1.09E-10 | 6.23E-09 | ENSMUSG00000045624 |
| Esyt1     | 0.45805782   | 0.17521707 | 8.94E-03 | 3.77E-02 | ENSMUSG00000025366 |
| Esyt2     | -0.49708003  | 0.18206092 | 6.33E-03 | 2.88E-02 | ENSMUSG00000021171 |
| Etf1      | -0.920925129 | 0.19643224 | 2.76E-06 | 4.90E-05 | ENSMUSG00000024360 |
| Etfb      | 0.688489908  | 0.11512938 | 2.23E-09 | 9.14E-08 | ENSMUSG00000004610 |
| Ets2      | -0.422310851 | 0.13204822 | 1.38E-03 | 8.55E-03 | ENSMUSG00000022895 |
| Eva1b     | 1.05378177   | 0.10780866 | 1.45E-22 | 3.74E-20 | ENSMUSG00000050212 |
| Evc       | 0.448686032  | 0.17928754 | 1.23E-02 | 4.83E-02 | ENSMUSG00000029122 |
| Evi5l     | 1.112793706  | 0.25273776 | 1.07E-05 | 1.54E-04 | ENSMUSG00000011832 |
| Exd1      | 1.688452056  | 0.64410956 | 8.76E-03 | 3.71E-02 | ENSMUSG00000048647 |
| Exoc3l4   | 1.244658024  | 0.34304946 | 2.85E-04 | 2.36E-03 | ENSMUSG00000021280 |
| Exoc5     | -0.971075118 | 0.22117458 | 1.13E-05 | 1.61E-04 | ENSMUSG00000061244 |
| Exoc6b    | -0.911040121 | 0.27581407 | 9.56E-04 | 6.38E-03 | ENSMUSG00000033769 |
| Exoc7     | 0.736497483  | 0.18281058 | 5.61E-05 | 6.30E-04 | ENSMUSG00000020792 |
| Exoc8     | 0.779435624  | 0.28215165 | 5.74E-03 | 2.67E-02 | ENSMUSG00000074030 |
| Exosc1    | -0.550379948 | 0.1457828  | 1.60E-04 | 1.46E-03 | ENSMUSG00000034321 |
| Exosc8    | -0.821731149 | 0.14378264 | 1.10E-08 | 3.87E-07 | ENSMUSG00000027752 |
| Ext2      | 0.476618122  | 0.16561423 | 4.00E-03 | 2.00E-02 | ENSMUSG00000027198 |
| Extl3     | 1.044348038  | 0.19024483 | 4.03E-08 | 1.20E-06 | ENSMUSG00000021978 |
| Eya2      | 0.959045773  | 0.15673465 | 9.42E-10 | 4.31E-08 | ENSMUSG00000017897 |
| F5        | -1.211752696 | 0.37750478 | 1.33E-03 | 8.29E-03 | ENSMUSG00000026579 |
| Fabp3     | 0.814222749  | 0.31378068 | 9.46E-03 | 3.94E-02 | ENSMUSG00000028773 |
| Faf1      | -0.564990352 | 0.14335171 | 8.10E-05 | 8.49E-04 | ENSMUSG00000010517 |
| Fah       | 0.384692745  | 0.14237561 | 6.89E-03 | 3.09E-02 | ENSMUSG00000030630 |
| Fahd2a    | 1.35664289   | 0.36375272 | 1.92E-04 | 1.70E-03 | ENSMUSG00000027371 |
| Fam102a   | 0.98500737   | 0.19731542 | 5.97E-07 | 1.29E-05 | ENSMUSG00000039157 |
| Fam102b   | -0.779808856 | 0.27477843 | 4.54E-03 | 2.21E-02 | ENSMUSG00000040339 |
| Fam111a   | -1.32204069  | 0.37158431 | 3.74E-04 | 2.95E-03 | ENSMUSG00000024691 |
| Fam114a1  | -0.792391177 | 0.12329044 | 1.30E-10 | 7.23E-09 | ENSMUSG00000029185 |
| Fam117a   | 0.866071514  | 0.29358798 | 3.18E-03 | 1.67E-02 | ENSMUSG00000038893 |
| Fam120aos | -1.343516142 | 0.18062771 | 1.02E-13 | 9.47E-12 | ENSMUSG00000097039 |
| Fam122a   | 0.638200193  | 0.24684277 | 9.73E-03 | 4.03E-02 | ENSMUSG00000074922 |
| Fam160a1  | 1.373135969  | 0.48632075 | 4.75E-03 | 2.30E-02 | ENSMUSG00000051000 |
| Fam162a   | 0.596185469  | 0.11939264 | 5.93E-07 | 1.28E-05 | ENSMUSG00000003955 |
| Fam173a   | 0.77736907   | 0.14292631 | 5.36E-08 | 1.53E-06 | ENSMUSG00000057411 |
| Fam185a   | -0.888808142 | 0.28932828 | 2.13E-03 | 1.20E-02 | ENSMUSG00000047221 |
| Fam199x   | -1.301451547 | 0.44043284 | 3.13E-03 | 1.64E-02 | ENSMUSG00000042595 |
| Fam204a   | -1.560180224 | 0.40156963 | 1.02E-04 | 1.02E-03 | ENSMUSG00000057858 |
| Fam20a    | 1.18823072   | 0.24192826 | 9.04E-07 | 1.85E-05 | ENSMUSG00000020614 |
| Fam20b    | 0.616602725  | 0.23402586 | 8.42E-03 | 3.59E-02 | ENSMUSG00000033557 |
| Fam214b   | 0.513584362  | 0.19312521 | 7.83E-03 | 3.40E-02 | ENSMUSG00000036002 |

|         |              |            |          |          |                    |
|---------|--------------|------------|----------|----------|--------------------|
| Fam220a | 0.443908442  | 0.17290118 | 1.02E-02 | 4.20E-02 | ENSMUSG00000083012 |
| Fam229b | 0.671199038  | 0.26020698 | 9.89E-03 | 4.08E-02 | ENSMUSG00000051736 |
| Fam234a | 0.724916502  | 0.15351984 | 2.34E-06 | 4.24E-05 | ENSMUSG00000024187 |
| Fam3a   | 0.724582835  | 0.17337922 | 2.93E-05 | 3.62E-04 | ENSMUSG00000031399 |
| Fam53b  | 0.893363767  | 0.21574712 | 3.46E-05 | 4.18E-04 | ENSMUSG00000030956 |
| Fam57a  | 0.769489218  | 0.29188978 | 8.38E-03 | 3.58E-02 | ENSMUSG00000069808 |
| Fam71f2 | -2.062021195 | 0.61036622 | 7.29E-04 | 5.13E-03 | ENSMUSG00000079652 |
| Fam76b  | -1.117168907 | 0.33780109 | 9.42E-04 | 6.32E-03 | ENSMUSG00000037808 |
| Fam8a1  | -1.211246235 | 0.19500229 | 5.25E-10 | 2.57E-08 | ENSMUSG00000069237 |
| Fancc   | 1.583924987  | 0.1821329  | 3.42E-18 | 5.49E-16 | ENSMUSG00000021461 |
| Fap     | 0.627481773  | 0.20456933 | 2.16E-03 | 1.22E-02 | ENSMUSG00000000392 |
| Fasn    | 0.841273119  | 0.18723823 | 7.02E-06 | 1.08E-04 | ENSMUSG00000025153 |
| Fastkd2 | -1.319245615 | 0.44425836 | 2.98E-03 | 1.58E-02 | ENSMUSG00000025962 |
| Fat1    | 0.908687967  | 0.206523   | 1.08E-05 | 1.55E-04 | ENSMUSG00000070047 |
| Fau     | -0.559916963 | 0.19674714 | 4.43E-03 | 2.17E-02 | ENSMUSG00000038274 |
| Fbln2   | 0.551499677  | 0.13995016 | 8.12E-05 | 8.50E-04 | ENSMUSG00000064080 |
| Fbln7   | 1.005896819  | 0.22050425 | 5.07E-06 | 8.18E-05 | ENSMUSG00000027386 |
| Fbxl2   | 0.755757449  | 0.29847519 | 1.13E-02 | 4.53E-02 | ENSMUSG00000032507 |
| Fbxl5   | -0.826121268 | 0.1678803  | 8.61E-07 | 1.78E-05 | ENSMUSG00000039753 |
| Fbxo2   | 0.71623565   | 0.24669149 | 3.69E-03 | 1.87E-02 | ENSMUSG00000041556 |
| Fbxo3   | -0.437691252 | 0.14641678 | 2.80E-03 | 1.50E-02 | ENSMUSG00000027180 |
| Fbxo30  | -1.115405574 | 0.2825531  | 7.89E-05 | 8.33E-04 | ENSMUSG00000047648 |
| Fbxo32  | -0.824690651 | 0.32349208 | 1.08E-02 | 4.37E-02 | ENSMUSG00000022358 |
| Fbxo44  | 0.72341369   | 0.25001318 | 3.81E-03 | 1.92E-02 | ENSMUSG00000029001 |
| Fbxo46  | 0.618042012  | 0.23956195 | 9.88E-03 | 4.08E-02 | ENSMUSG00000050428 |
| Fbxw5   | 0.702445749  | 0.22917193 | 2.18E-03 | 1.23E-02 | ENSMUSG00000015095 |
| Fbxw8   | 0.435707758  | 0.15040314 | 3.77E-03 | 1.90E-02 | ENSMUSG00000032867 |
| Fbxw9   | 0.804238763  | 0.23010863 | 4.74E-04 | 3.59E-03 | ENSMUSG00000008167 |
| Fcf1    | -0.813664503 | 0.14357673 | 1.45E-08 | 4.93E-07 | ENSMUSG00000021243 |
| Fcgrt   | 0.615238262  | 0.11195583 | 3.90E-08 | 1.17E-06 | ENSMUSG00000003420 |
| Fcor    | 1.533733902  | 0.52581454 | 3.54E-03 | 1.81E-02 | ENSMUSG00000089665 |
| Fdx1    | -0.6295764   | 0.14588218 | 1.59E-05 | 2.17E-04 | ENSMUSG00000032051 |
| Fdxr    | 1.195072092  | 0.1913679  | 4.24E-10 | 2.12E-08 | ENSMUSG00000018861 |
| Fem1b   | -0.789858197 | 0.30510566 | 9.63E-03 | 4.00E-02 | ENSMUSG00000032244 |
| Fem1c   | -1.069464137 | 0.34342593 | 1.85E-03 | 1.08E-02 | ENSMUSG00000033319 |
| Fgd3    | 0.597346179  | 0.18553531 | 1.28E-03 | 8.09E-03 | ENSMUSG00000037946 |
| Fgf21   | -1.9271031   | 0.54024991 | 3.61E-04 | 2.87E-03 | ENSMUSG00000030827 |
| Fgfr1   | 0.509676009  | 0.10788117 | 2.31E-06 | 4.21E-05 | ENSMUSG00000031565 |
| Fgfr1op | -0.795712351 | 0.31381296 | 1.12E-02 | 4.50E-02 | ENSMUSG00000069135 |
| Fgfr2   | 2.288143337  | 0.18355947 | 1.15E-35 | 8.93E-33 | ENSMUSG00000030849 |
| Fgfr3   | 2.197750295  | 0.2104227  | 1.55E-25 | 5.53E-23 | ENSMUSG00000054252 |
| Fgfrl1  | 0.470863153  | 0.11883881 | 7.43E-05 | 7.94E-04 | ENSMUSG00000008090 |
| Fhl1    | 0.588261707  | 0.17991621 | 1.08E-03 | 7.02E-03 | ENSMUSG00000023092 |

|         |              |            |          |          |                      |
|---------|--------------|------------|----------|----------|----------------------|
| Fhl2    | 0.380515108  | 0.14410463 | 8.28E-03 | 3.55E-02 | ENSMUSG00000008136   |
| Fhl3    | 0.761139782  | 0.29161235 | 9.05E-03 | 3.80E-02 | ENSMUSG000000032643  |
| Fhod1   | 1.664376581  | 0.66477294 | 1.23E-02 | 4.82E-02 | ENSMUSG000000014778  |
| Fibin   | 0.708454522  | 0.13255263 | 9.06E-08 | 2.43E-06 | ENSMUSG000000074971  |
| Fibp    | 0.567387543  | 0.13322695 | 2.06E-05 | 2.69E-04 | ENSMUSG000000024911  |
| Ficd    | 0.952148525  | 0.28566116 | 8.59E-04 | 5.88E-03 | ENSMUSG000000053334  |
| Figl12  | 2.98478526   | 1.17692333 | 1.12E-02 | 4.49E-02 | ENSMUSG000000095407  |
| Fip1l1  | -0.903380186 | 0.15137921 | 2.41E-09 | 9.84E-08 | ENSMUSG000000029227  |
| Fkbp10  | 0.693321557  | 0.11698673 | 3.09E-09 | 1.22E-07 | ENSMUSG000000001555  |
| Fkbp11  | -0.497030054 | 0.13681058 | 2.80E-04 | 2.32E-03 | ENSMUSG000000003355  |
| Fkbp14  | 0.758221378  | 0.25465446 | 2.91E-03 | 1.55E-02 | ENSMUSG000000038074  |
| Fkbp2   | 0.823830401  | 0.17138307 | 1.53E-06 | 2.94E-05 | ENSMUSG000000056629  |
| Fkbp3   | -0.728132354 | 0.18240842 | 6.56E-05 | 7.17E-04 | ENSMUSG000000020949  |
| Fkbp5   | 0.301773115  | 0.11326677 | 7.72E-03 | 3.37E-02 | ENSMUSG000000024222  |
| Fkbp8   | 0.70741211   | 0.1177411  | 1.88E-09 | 7.81E-08 | ENSMUSG000000019428  |
| Fkrp    | 1.098658541  | 0.22494438 | 1.04E-06 | 2.10E-05 | ENSMUSG000000048920  |
| Ficn    | 0.931255404  | 0.2408852  | 1.11E-04 | 1.08E-03 | ENSMUSG000000032633  |
| Flii    | 0.394016944  | 0.15496993 | 1.10E-02 | 4.43E-02 | ENSMUSG000000002812  |
| Flna    | 0.81819547   | 0.12581593 | 7.87E-11 | 4.64E-09 | ENSMUSG000000031328  |
| Flnb    | 0.660705678  | 0.16397417 | 5.59E-05 | 6.30E-04 | ENSMUSG000000025278  |
| Flot2   | 0.563469973  | 0.15453099 | 2.66E-04 | 2.23E-03 | ENSMUSG000000061981  |
| Flt3l   | -1.286268889 | 0.37130129 | 5.32E-04 | 3.94E-03 | ENSMUSG0000000110185 |
| Flywch2 | 1.001012289  | 0.25053889 | 6.46E-05 | 7.10E-04 | ENSMUSG000000023911  |
| Fmnl2   | -0.974451417 | 0.2041087  | 1.80E-06 | 3.41E-05 | ENSMUSG000000036053  |
| Fmo1    | 1.021338429  | 0.17207389 | 2.93E-09 | 1.17E-07 | ENSMUSG000000040181  |
| Fmod    | 0.90347267   | 0.19344202 | 3.00E-06 | 5.24E-05 | ENSMUSG000000041559  |
| Fn3krp  | 0.945367165  | 0.32101551 | 3.23E-03 | 1.68E-02 | ENSMUSG000000039253  |
| Fndc1   | 1.122192042  | 0.20930675 | 8.25E-08 | 2.24E-06 | ENSMUSG000000071984  |
| Fndc3a  | -0.735840969 | 0.26738404 | 5.92E-03 | 2.73E-02 | ENSMUSG000000033487  |
| Fndc3b  | -0.502374445 | 0.18337005 | 6.15E-03 | 2.81E-02 | ENSMUSG000000039286  |
| Fnip1   | -0.647908016 | 0.20240833 | 1.37E-03 | 8.50E-03 | ENSMUSG000000035992  |
| Fnip2   | -0.730195289 | 0.26355388 | 5.60E-03 | 2.62E-02 | ENSMUSG000000061175  |
| Foxa2   | 1.737127389  | 0.34822151 | 6.08E-07 | 1.30E-05 | ENSMUSG000000037025  |
| Foxd1   | 2.177982782  | 0.5574284  | 9.34E-05 | 9.52E-04 | ENSMUSG000000078302  |
| Foxp1   | -0.637205531 | 0.16143769 | 7.91E-05 | 8.33E-04 | ENSMUSG000000030067  |
| Frat2   | -1.351001414 | 0.39090051 | 5.48E-04 | 4.04E-03 | ENSMUSG000000047604  |
| Frzb    | 0.949677829  | 0.1566092  | 1.33E-09 | 5.77E-08 | ENSMUSG000000027004  |
| Fscn1   | 0.50468065   | 0.12749097 | 7.54E-05 | 8.01E-04 | ENSMUSG000000029581  |
| Fsd1l   | -3.128408113 | 1.11489536 | 5.02E-03 | 2.40E-02 | ENSMUSG000000054752  |
| Fst     | 0.957865286  | 0.18318764 | 1.71E-07 | 4.21E-06 | ENSMUSG000000021765  |
| Fstl1   | 0.317304762  | 0.11673472 | 6.56E-03 | 2.97E-02 | ENSMUSG000000022816  |
| Fstl4   | 2.759647946  | 0.70057524 | 8.18E-05 | 8.54E-04 | ENSMUSG000000036264  |
| Fth1    | -0.721710208 | 0.10764775 | 2.02E-11 | 1.35E-09 | ENSMUSG000000024661  |

|            |              |            |          |          |                    |
|------------|--------------|------------|----------|----------|--------------------|
| Ftsj3      | -0.783116695 | 0.18143036 | 1.59E-05 | 2.17E-04 | ENSMUSG00000020706 |
| Fubp1      | -0.636347769 | 0.14337475 | 9.06E-06 | 1.33E-04 | ENSMUSG00000028034 |
| Fuca1      | 0.485948263  | 0.12032527 | 5.38E-05 | 6.10E-04 | ENSMUSG00000028673 |
| Fuca2      | 0.658913484  | 0.19785069 | 8.67E-04 | 5.93E-03 | ENSMUSG00000019810 |
| Furin      | 0.62952545   | 0.12270153 | 2.89E-07 | 6.71E-06 | ENSMUSG00000030530 |
| Fut11      | 0.788307772  | 0.20681299 | 1.38E-04 | 1.30E-03 | ENSMUSG00000039357 |
| Fuz        | 0.729402008  | 0.19364337 | 1.65E-04 | 1.51E-03 | ENSMUSG00000011658 |
| Fxr1       | -1.320934026 | 0.24721439 | 9.13E-08 | 2.44E-06 | ENSMUSG00000027680 |
| Fxr2       | -0.407260717 | 0.13043886 | 1.79E-03 | 1.05E-02 | ENSMUSG00000018765 |
| Fxyd1      | 0.749723756  | 0.10548304 | 1.18E-12 | 9.37E-11 | ENSMUSG00000036570 |
| Fxyd2      | 1.357949934  | 0.35730713 | 1.44E-04 | 1.35E-03 | ENSMUSG00000059412 |
| Fxyd3      | 0.941725143  | 0.16785279 | 2.02E-08 | 6.56E-07 | ENSMUSG00000057092 |
| Fzd1       | 1.615174053  | 0.20473915 | 3.05E-15 | 3.37E-13 | ENSMUSG00000044674 |
| Fzd2       | 0.795535524  | 0.15317349 | 2.06E-07 | 4.99E-06 | ENSMUSG00000050288 |
| Fzd5       | 2.108616692  | 0.27601437 | 2.18E-14 | 2.14E-12 | ENSMUSG00000045005 |
| Fzd8       | 1.196318291  | 0.18853947 | 2.22E-10 | 1.18E-08 | ENSMUSG00000036904 |
| Fzd9       | 1.247889055  | 0.27986067 | 8.24E-06 | 1.23E-04 | ENSMUSG00000049551 |
| Fzr1       | 0.681968422  | 0.20603458 | 9.33E-04 | 6.28E-03 | ENSMUSG00000020235 |
| G0s2       | 0.583036651  | 0.15110423 | 1.14E-04 | 1.11E-03 | ENSMUSG00000009633 |
| G3bp1      | -0.289568127 | 0.11539523 | 1.21E-02 | 4.77E-02 | ENSMUSG00000018583 |
| G6pdx      | 0.416748273  | 0.14681996 | 4.53E-03 | 2.21E-02 | ENSMUSG00000031400 |
| Gaa        | 0.537970702  | 0.13556642 | 7.24E-05 | 7.77E-04 | ENSMUSG00000025579 |
| Gab2       | -0.557836529 | 0.21724336 | 1.02E-02 | 4.19E-02 | ENSMUSG00000004508 |
| Gabarapl1  | -0.352891415 | 0.10055417 | 4.49E-04 | 3.44E-03 | ENSMUSG00000030161 |
| Gabbr1     | 1.091812621  | 0.23028845 | 2.13E-06 | 3.90E-05 | ENSMUSG00000024462 |
| Gabpb1     | -0.93116176  | 0.19072386 | 1.05E-06 | 2.11E-05 | ENSMUSG00000027361 |
| Gadd45a    | -1.160523608 | 0.13448017 | 6.15E-18 | 9.53E-16 | ENSMUSG00000036390 |
| Gadd45g    | 0.466614328  | 0.14745756 | 1.55E-03 | 9.37E-03 | ENSMUSG00000021453 |
| Gadd45gip1 | 0.443566526  | 0.14276541 | 1.89E-03 | 1.10E-02 | ENSMUSG00000033751 |
| Gale       | 0.485882995  | 0.18921286 | 1.02E-02 | 4.19E-02 | ENSMUSG00000028671 |
| Galk1      | 0.393981218  | 0.11995042 | 1.02E-03 | 6.71E-03 | ENSMUSG00000020766 |
| Galns      | 0.708410523  | 0.26074886 | 6.59E-03 | 2.97E-02 | ENSMUSG00000015027 |
| Galnt10    | 0.606773509  | 0.18781379 | 1.23E-03 | 7.87E-03 | ENSMUSG00000020520 |
| Galnt15    | -0.560772783 | 0.21879109 | 1.04E-02 | 4.24E-02 | ENSMUSG00000021903 |
| Galnt17    | 0.653210548  | 0.25516767 | 1.05E-02 | 4.27E-02 | ENSMUSG00000034040 |
| Galnt3     | -1.679810743 | 0.63997846 | 8.67E-03 | 3.68E-02 | ENSMUSG00000026994 |
| Galnt7     | -1.129839984 | 0.35228424 | 1.34E-03 | 8.34E-03 | ENSMUSG00000031608 |
| Galr2      | 1.671776342  | 0.45252758 | 2.20E-04 | 1.91E-03 | ENSMUSG00000020793 |
| Gamt       | 1.340278502  | 0.26987364 | 6.82E-07 | 1.43E-05 | ENSMUSG00000020150 |
| Ganab      | 0.453662612  | 0.14437353 | 1.68E-03 | 1.00E-02 | ENSMUSG00000071650 |
| Gapvd1     | -0.8284284   | 0.24515826 | 7.27E-04 | 5.12E-03 | ENSMUSG00000026867 |
| Gars       | -0.301855842 | 0.10373628 | 3.62E-03 | 1.84E-02 | ENSMUSG00000029777 |
| Gas1       | 1.750946152  | 0.1958616  | 3.90E-19 | 6.76E-17 | ENSMUSG00000052957 |

|         |              |            |          |          |                    |
|---------|--------------|------------|----------|----------|--------------------|
| Gas5    | -1.03050047  | 0.11636854 | 8.33E-19 | 1.41E-16 | ENSMUSG00000053332 |
| Gas6    | 1.350744497  | 0.12037837 | 3.22E-29 | 1.70E-26 | ENSMUSG00000031451 |
| Gatad2b | -0.508234906 | 0.16475855 | 2.04E-03 | 1.16E-02 | ENSMUSG00000042390 |
| Gatd1   | 0.401668838  | 0.1453823  | 5.73E-03 | 2.67E-02 | ENSMUSG00000051007 |
| Gatd3a  | 0.530542897  | 0.14612784 | 2.83E-04 | 2.34E-03 | ENSMUSG00000053329 |
| Gba     | 0.630343298  | 0.170928   | 2.26E-04 | 1.95E-03 | ENSMUSG00000028048 |
| Gba2    | 1.418104734  | 0.52593413 | 7.01E-03 | 3.13E-02 | ENSMUSG00000028467 |
| Gbe1    | -0.562809321 | 0.14361996 | 8.90E-05 | 9.14E-04 | ENSMUSG00000022707 |
| Gcc2    | -0.988833877 | 0.33473834 | 3.14E-03 | 1.65E-02 | ENSMUSG00000038039 |
| Gch1    | -1.886937256 | 0.2169692  | 3.41E-18 | 5.49E-16 | ENSMUSG00000037580 |
| Gclc    | -1.13982781  | 0.17815411 | 1.57E-10 | 8.64E-09 | ENSMUSG00000032350 |
| Gclm    | -1.043404314 | 0.12249869 | 1.63E-17 | 2.30E-15 | ENSMUSG00000028124 |
| Gcnt2   | -0.673198395 | 0.23323182 | 3.90E-03 | 1.96E-02 | ENSMUSG00000021360 |
| Gdf10   | 1.773513736  | 0.35556037 | 6.10E-07 | 1.31E-05 | ENSMUSG00000021943 |
| Gdf15   | -1.958417624 | 0.19862287 | 6.21E-23 | 1.82E-20 | ENSMUSG00000038508 |
| Gdi2    | -0.446387203 | 0.12009087 | 2.02E-04 | 1.77E-03 | ENSMUSG00000021218 |
| Gdpd1   | -0.765280324 | 0.2750284  | 5.39E-03 | 2.54E-02 | ENSMUSG00000061666 |
| Gdpd2   | 3.471785359  | 1.36447579 | 1.09E-02 | 4.42E-02 | ENSMUSG00000019359 |
| Gdpgp1  | 0.912506807  | 0.30144399 | 2.47E-03 | 1.36E-02 | ENSMUSG00000050973 |
| Gemin5  | -0.86877473  | 0.23628044 | 2.36E-04 | 2.02E-03 | ENSMUSG00000037275 |
| Gfer    | -0.542671965 | 0.12778335 | 2.17E-05 | 2.81E-04 | ENSMUSG00000040888 |
| Gfod2   | 1.479048147  | 0.38401342 | 1.17E-04 | 1.14E-03 | ENSMUSG00000013150 |
| Gfpt1   | -0.611011217 | 0.18128196 | 7.50E-04 | 5.26E-03 | ENSMUSG00000029992 |
| Gfra2   | -1.196733008 | 0.25763573 | 3.40E-06 | 5.82E-05 | ENSMUSG00000022103 |
| Gfra4   | 1.069979193  | 0.25117502 | 2.05E-05 | 2.69E-04 | ENSMUSG00000027316 |
| Ggact   | 0.806116052  | 0.20168598 | 6.42E-05 | 7.08E-04 | ENSMUSG00000041625 |
| Ggct    | -1.392238423 | 0.29191869 | 1.85E-06 | 3.47E-05 | ENSMUSG00000002797 |
| Ggcx    | 0.674007588  | 0.16941423 | 6.94E-05 | 7.50E-04 | ENSMUSG00000053460 |
| Ggh     | 0.729666632  | 0.1870713  | 9.60E-05 | 9.72E-04 | ENSMUSG00000073987 |
| Ggnbp2  | -1.510407387 | 0.20017892 | 4.51E-14 | 4.30E-12 | ENSMUSG00000020530 |
| Ggps1   | -0.931550118 | 0.18168849 | 2.94E-07 | 6.79E-06 | ENSMUSG00000021302 |
| Ggt5    | 1.582416536  | 0.63324829 | 1.25E-02 | 4.87E-02 | ENSMUSG00000006344 |
| Ghitm   | -0.776152828 | 0.10722826 | 4.54E-13 | 3.91E-11 | ENSMUSG00000041028 |
| Gid4    | -0.5639312   | 0.14861987 | 1.48E-04 | 1.38E-03 | ENSMUSG00000018415 |
| Gid8    | 0.625455531  | 0.23140891 | 6.88E-03 | 3.08E-02 | ENSMUSG00000027573 |
| Gigyf2  | -0.79106985  | 0.27743032 | 4.35E-03 | 2.14E-02 | ENSMUSG00000048000 |
| Ginm1   | -0.554283767 | 0.15546973 | 3.64E-04 | 2.88E-03 | ENSMUSG00000040006 |
| Gipc1   | 0.669310274  | 0.18149139 | 2.26E-04 | 1.95E-03 | ENSMUSG00000019433 |
| Glce    | -0.824341266 | 0.30605996 | 7.07E-03 | 3.15E-02 | ENSMUSG00000032252 |
| Gli1    | 1.450819444  | 0.25880172 | 2.07E-08 | 6.70E-07 | ENSMUSG00000025407 |
| Gli2    | 1.686540315  | 0.30429743 | 2.98E-08 | 9.26E-07 | ENSMUSG00000048402 |
| Glipr2  | -0.5074266   | 0.15036131 | 7.39E-04 | 5.19E-03 | ENSMUSG00000028480 |
| Glis2   | 0.781856268  | 0.25271931 | 1.98E-03 | 1.13E-02 | ENSMUSG00000014303 |

|         |              |            |          |          |                    |
|---------|--------------|------------|----------|----------|--------------------|
| Glmn    | -1.855737545 | 0.4651143  | 6.61E-05 | 7.21E-04 | ENSMUSG00000029276 |
| Glmp    | 0.851671955  | 0.13139651 | 9.07E-11 | 5.26E-09 | ENSMUSG00000001418 |
| Glrx    | -0.661990868 | 0.14020499 | 2.34E-06 | 4.24E-05 | ENSMUSG00000021591 |
| Glrx3   | -0.447032051 | 0.13861404 | 1.26E-03 | 7.98E-03 | ENSMUSG00000031068 |
| Gls     | -0.48263084  | 0.19249672 | 1.22E-02 | 4.79E-02 | ENSMUSG00000026103 |
| Gm10076 | -0.594494763 | 0.23584061 | 1.17E-02 | 4.65E-02 | ENSMUSG00000060143 |
| Gm10275 | -0.606560224 | 0.21883706 | 5.58E-03 | 2.61E-02 | ENSMUSG00000069682 |
| Gm10689 | -0.663181647 | 0.26484542 | 1.23E-02 | 4.82E-02 | ENSMUSG00000074412 |
| Gm11476 | 1.591009365  | 0.5668107  | 5.00E-03 | 2.40E-02 | ENSMUSG00000085596 |
| Gm11478 | -0.540836113 | 0.18685427 | 3.80E-03 | 1.91E-02 | ENSMUSG00000083992 |
| Gm11747 | 3.059558584  | 0.64341809 | 1.98E-06 | 3.69E-05 | ENSMUSG00000086514 |
| Gm11826 | -0.682237391 | 0.21980558 | 1.91E-03 | 1.10E-02 | ENSMUSG00000083328 |
| Gm11956 | -0.550592554 | 0.16791383 | 1.04E-03 | 6.83E-03 | ENSMUSG00000084012 |
| Gm12022 | -3.557534597 | 1.22828739 | 3.78E-03 | 1.90E-02 | ENSMUSG00000085675 |
| Gm13166 | -1.482206815 | 0.38465898 | 1.17E-04 | 1.13E-03 | ENSMUSG00000085525 |
| Gm13205 | -1.286140843 | 0.37416838 | 5.87E-04 | 4.29E-03 | ENSMUSG00000086606 |
| Gm13411 | 1.770675062  | 0.44453155 | 6.80E-05 | 7.38E-04 | ENSMUSG00000085999 |
| Gm13586 | -1.257883691 | 0.43641501 | 3.95E-03 | 1.98E-02 | ENSMUSG00000082931 |
| Gm13594 | 1.857289228  | 0.57349803 | 1.20E-03 | 7.72E-03 | ENSMUSG00000086881 |
| Gm13815 | -1.21990656  | 0.46297046 | 8.41E-03 | 3.59E-02 | ENSMUSG00000080860 |
| Gm13889 | -1.047256483 | 0.20355738 | 2.68E-07 | 6.25E-06 | ENSMUSG00000087006 |
| Gm14138 | -1.347593809 | 0.49435427 | 6.41E-03 | 2.91E-02 | ENSMUSG00000081572 |
| Gm15148 | -0.855309101 | 0.33077361 | 9.72E-03 | 4.03E-02 | ENSMUSG00000082423 |
| Gm15464 | -0.78616246  | 0.24396996 | 1.27E-03 | 8.03E-03 | ENSMUSG00000082609 |
| Gm15510 | 1.209210743  | 0.46357682 | 9.10E-03 | 3.82E-02 | ENSMUSG00000086604 |
| Gm16845 | 1.012210997  | 0.30637129 | 9.54E-04 | 6.37E-03 | ENSMUSG00000096917 |
| Gm17066 | -0.939288815 | 0.36080654 | 9.23E-03 | 3.87E-02 | ENSMUSG00000091509 |
| Gm19353 | 0.510657869  | 0.17411104 | 3.36E-03 | 1.74E-02 | ENSMUSG00000098332 |
| Gm19412 | 1.12569857   | 0.43117981 | 9.03E-03 | 3.80E-02 | ENSMUSG00000101013 |
| Gm19705 | 1.389312963  | 0.35863037 | 1.07E-04 | 1.06E-03 | ENSMUSG00000097080 |
| Gm19739 | -0.921489479 | 0.11943134 | 1.20E-14 | 1.23E-12 | ENSMUSG00000104960 |
| Gm19810 | -0.611850575 | 0.19472522 | 1.68E-03 | 1.00E-02 | ENSMUSG00000111361 |
| Gm2000  | -0.616631827 | 0.19152881 | 1.28E-03 | 8.09E-03 | ENSMUSG00000078193 |
| Gm2415  | 1.325369394  | 0.32137322 | 3.72E-05 | 4.45E-04 | ENSMUSG00000086119 |
| Gm24276 | -1.045555276 | 0.39165595 | 7.59E-03 | 3.32E-02 | ENSMUSG00000076135 |
| Gm24951 | -0.640138606 | 0.24965604 | 1.03E-02 | 4.23E-02 | ENSMUSG00000076136 |
| Gm26534 | 1.03214659   | 0.39491574 | 8.96E-03 | 3.78E-02 | ENSMUSG00000097729 |
| Gm26917 | 1.482425626  | 0.40201149 | 2.26E-04 | 1.95E-03 | ENSMUSG00000097915 |
| Gm2830  | -0.580245993 | 0.20052749 | 3.81E-03 | 1.92E-02 | ENSMUSG00000086567 |
| Gm28730 | 1.149654933  | 0.44247526 | 9.37E-03 | 3.91E-02 | ENSMUSG00000101438 |
| Gm34006 | 1.440750582  | 0.41896015 | 5.84E-04 | 4.27E-03 | ENSMUSG00000110980 |
| Gm34342 | 1.173017877  | 0.39380735 | 2.90E-03 | 1.54E-02 | ENSMUSG00000102101 |
| Gm3550  | -0.454130356 | 0.15623511 | 3.65E-03 | 1.86E-02 | ENSMUSG00000078240 |

|         |              |            |          |          |                    |
|---------|--------------|------------|----------|----------|--------------------|
| Gm3604  | -0.824908975 | 0.27449788 | 2.65E-03 | 1.44E-02 | ENSMUSG00000094870 |
| Gm36378 | -0.97288981  | 0.27106184 | 3.32E-04 | 2.68E-03 | ENSMUSG00000106926 |
| Gm37494 | -1.863996503 | 0.53665573 | 5.14E-04 | 3.83E-03 | ENSMUSG00000108609 |
| Gm37510 | -0.454263578 | 0.15574726 | 3.54E-03 | 1.81E-02 | ENSMUSG00000103928 |
| Gm37893 | 1.259812549  | 0.32345584 | 9.83E-05 | 9.90E-04 | ENSMUSG00000103906 |
| Gm3800  | -1.54895206  | 0.49649234 | 1.81E-03 | 1.06E-02 | ENSMUSG00000113643 |
| Gm38220 | 3.370009775  | 0.7977875  | 2.40E-05 | 3.06E-04 | ENSMUSG00000102158 |
| Gm40598 | 1.578444685  | 0.38588542 | 4.31E-05 | 5.06E-04 | ENSMUSG00000113581 |
| Gm42815 | -1.051467865 | 0.34794427 | 2.51E-03 | 1.38E-02 | ENSMUSG00000104649 |
| Gm42957 | -0.508075708 | 0.1517262  | 8.12E-04 | 5.61E-03 | ENSMUSG00000105814 |
| Gm43088 | -0.479084121 | 0.15263959 | 1.70E-03 | 1.01E-02 | ENSMUSG00000105644 |
| Gm43712 | -2.001529068 | 0.76264744 | 8.68E-03 | 3.68E-02 | ENSMUSG00000104378 |
| Gm4468  | -0.742856354 | 0.22872069 | 1.16E-03 | 7.50E-03 | ENSMUSG00000092014 |
| Gm45420 | 0.810346585  | 0.19602571 | 3.57E-05 | 4.28E-04 | ENSMUSG00000110206 |
| Gm45716 | -0.949772052 | 0.27334958 | 5.12E-04 | 3.82E-03 | ENSMUSG00000110313 |
| Gm46224 | -0.681576956 | 0.26930543 | 1.14E-02 | 4.54E-02 | ENSMUSG00000111897 |
| Gm4673  | 4.630077385  | 1.24348194 | 1.96E-04 | 1.74E-03 | ENSMUSG00000097747 |
| Gm47204 | 1.845315731  | 0.6191335  | 2.88E-03 | 1.54E-02 | ENSMUSG00000110344 |
| Gm47445 | 1.68407296   | 0.46495016 | 2.92E-04 | 2.41E-03 | ENSMUSG00000111293 |
| Gm49041 | 1.587507264  | 0.59950565 | 8.10E-03 | 3.49E-02 | ENSMUSG00000115007 |
| Gm49797 | -1.109254627 | 0.26489054 | 2.82E-05 | 3.51E-04 | ENSMUSG00000116564 |
| Gm4997  | -0.516469698 | 0.1270591  | 4.81E-05 | 5.55E-04 | ENSMUSG00000045694 |
| Gm5617  | 0.859977932  | 0.15039616 | 1.08E-08 | 3.81E-07 | ENSMUSG00000042293 |
| Gm5805  | -0.439837908 | 0.15971818 | 5.89E-03 | 2.72E-02 | ENSMUSG00000061848 |
| Gm5963  | -0.569043353 | 0.15858711 | 3.33E-04 | 2.69E-03 | ENSMUSG00000052192 |
| Gm6030  | -0.912443557 | 0.20133598 | 5.84E-06 | 9.25E-05 | ENSMUSG00000062284 |
| Gm6977  | -0.77865469  | 0.29866508 | 9.13E-03 | 3.83E-02 | ENSMUSG00000084289 |
| Gm7117  | -0.644938785 | 0.19963598 | 1.24E-03 | 7.87E-03 | ENSMUSG00000063442 |
| Gm7424  | -0.917055102 | 0.36543488 | 1.21E-02 | 4.77E-02 | ENSMUSG00000108442 |
| Gm7691  | 1.20590951   | 0.30704175 | 8.58E-05 | 8.85E-04 | ENSMUSG00000115026 |
| Gm8213  | -0.587835012 | 0.15316967 | 1.24E-04 | 1.19E-03 | ENSMUSG00000082474 |
| Gm8292  | 0.874301704  | 0.27601932 | 1.54E-03 | 9.31E-03 | ENSMUSG00000100017 |
| Gm867   | 0.935887647  | 0.37632809 | 1.29E-02 | 5.00E-02 | ENSMUSG00000050157 |
| Gm9703  | -1.109240564 | 0.41791628 | 7.95E-03 | 3.44E-02 | ENSMUSG00000082741 |
| Gm9776  | 1.171746953  | 0.46705496 | 1.21E-02 | 4.77E-02 | ENSMUSG00000042857 |
| Gm9794  | -1.427406733 | 0.48862258 | 3.49E-03 | 1.79E-02 | ENSMUSG00000107082 |
| Gm9892  | -2.136265556 | 0.54803749 | 9.70E-05 | 9.81E-04 | ENSMUSG00000052825 |
| Gmfb    | -0.594743935 | 0.14364343 | 3.47E-05 | 4.18E-04 | ENSMUSG00000062014 |
| Gmppa   | 0.57731264   | 0.16201895 | 3.66E-04 | 2.90E-03 | ENSMUSG00000033021 |
| Gna11   | 0.348729286  | 0.11826628 | 3.19E-03 | 1.67E-02 | ENSMUSG00000034781 |
| Gna13   | -0.755156589 | 0.15182109 | 6.56E-07 | 1.39E-05 | ENSMUSG00000020611 |
| Gnai2   | 0.395615486  | 0.09741805 | 4.89E-05 | 5.59E-04 | ENSMUSG00000032562 |
| Gnai3   | -0.865116838 | 0.23247895 | 1.98E-04 | 1.75E-03 | ENSMUSG00000000001 |



|         |              |            |          |          |                    |
|---------|--------------|------------|----------|----------|--------------------|
| Gnb2    | 0.392580681  | 0.12567048 | 1.78E-03 | 1.05E-02 | ENSMUSG00000029713 |
| Gng11   | 1.208526614  | 0.12200579 | 3.94E-23 | 1.18E-20 | ENSMUSG00000032766 |
| Gng12   | -0.319482157 | 0.11633082 | 6.03E-03 | 2.77E-02 | ENSMUSG00000036402 |
| Gnl2    | -0.9684398   | 0.19688517 | 8.71E-07 | 1.80E-05 | ENSMUSG00000028869 |
| Gnl3    | -1.489139728 | 0.20972024 | 1.24E-12 | 9.73E-11 | ENSMUSG00000042354 |
| Gnpda2  | -1.415405982 | 0.55976319 | 1.15E-02 | 4.56E-02 | ENSMUSG00000029209 |
| Gnpnat1 | -0.609714173 | 0.17424419 | 4.67E-04 | 3.55E-03 | ENSMUSG00000037722 |
| Gnptg   | 0.584903678  | 0.14892307 | 8.58E-05 | 8.85E-04 | ENSMUSG00000035521 |
| Gns     | 0.358340616  | 0.12740956 | 4.92E-03 | 2.37E-02 | ENSMUSG00000034707 |
| Golga3  | -0.931571717 | 0.26420656 | 4.22E-04 | 3.27E-03 | ENSMUSG00000029502 |
| Golga4  | -1.301854429 | 0.30274391 | 1.71E-05 | 2.30E-04 | ENSMUSG00000038708 |
| Golga7  | -0.801966255 | 0.31933355 | 1.20E-02 | 4.75E-02 | ENSMUSG00000015341 |
| Golim4  | -0.986125738 | 0.24225707 | 4.69E-05 | 5.43E-04 | ENSMUSG00000034109 |
| Golph3  | -0.367456573 | 0.12222971 | 2.64E-03 | 1.44E-02 | ENSMUSG00000022200 |
| Gpaa1   | 0.699676768  | 0.17523592 | 6.53E-05 | 7.16E-04 | ENSMUSG00000022561 |
| Gpank1  | -0.533485979 | 0.17294795 | 2.04E-03 | 1.16E-02 | ENSMUSG00000092417 |
| Gpbp1   | -1.413059556 | 0.23510419 | 1.85E-09 | 7.76E-08 | ENSMUSG00000032745 |
| Gpc1    | 1.174039602  | 0.11190149 | 9.43E-26 | 3.55E-23 | ENSMUSG00000034220 |
| Gpc4    | 0.59039646   | 0.22393967 | 8.38E-03 | 3.58E-02 | ENSMUSG00000031119 |
| Gpd1    | 1.233791504  | 0.48352745 | 1.07E-02 | 4.35E-02 | ENSMUSG00000023019 |
| Gpd2    | -0.954520383 | 0.19702388 | 1.27E-06 | 2.48E-05 | ENSMUSG00000026827 |
| Gper1   | 2.121419022  | 0.5031695  | 2.49E-05 | 3.16E-04 | ENSMUSG00000053647 |
| Gpi1    | 0.313137442  | 0.11295379 | 5.57E-03 | 2.61E-02 | ENSMUSG00000036427 |
| Gpr137  | 1.011539433  | 0.18161003 | 2.55E-08 | 8.07E-07 | ENSMUSG00000024958 |
| Gpr176  | -0.692769548 | 0.21002291 | 9.72E-04 | 6.47E-03 | ENSMUSG00000040133 |
| Gpr89   | 0.619542516  | 0.21043421 | 3.24E-03 | 1.69E-02 | ENSMUSG00000028096 |
| Gprc5c  | 0.951584526  | 0.28008114 | 6.80E-04 | 4.82E-03 | ENSMUSG00000051043 |
| Gpsm3   | 0.764224536  | 0.1941621  | 8.28E-05 | 8.62E-04 | ENSMUSG00000034786 |
| Gpx3    | 0.644092611  | 0.08931353 | 5.53E-13 | 4.73E-11 | ENSMUSG00000018339 |
| Gpx7    | 0.454494345  | 0.18016    | 1.16E-02 | 4.63E-02 | ENSMUSG00000028597 |
| Gpx8    | 0.319307425  | 0.12408769 | 1.01E-02 | 4.14E-02 | ENSMUSG00000021760 |
| Grap    | -1.054275592 | 0.27498421 | 1.26E-04 | 1.21E-03 | ENSMUSG00000004837 |
| Grasp   | 1.3426576    | 0.14339003 | 7.70E-21 | 1.56E-18 | ENSMUSG00000000531 |
| Grhpr   | 0.635887747  | 0.16347225 | 1.00E-04 | 1.00E-03 | ENSMUSG00000035637 |
| Grina   | 0.490345869  | 0.13458772 | 2.69E-04 | 2.25E-03 | ENSMUSG00000022564 |
| Grpel1  | -0.882322032 | 0.13479349 | 5.92E-11 | 3.61E-09 | ENSMUSG00000029198 |
| Grpel2  | -0.988342009 | 0.25198161 | 8.77E-05 | 9.03E-04 | ENSMUSG00000024580 |
| Grsf1   | -0.628513492 | 0.16520551 | 1.42E-04 | 1.33E-03 | ENSMUSG00000044221 |
| Gsc     | 1.090630222  | 0.30803108 | 3.99E-04 | 3.12E-03 | ENSMUSG00000021095 |
| Gse1    | 1.534219329  | 0.26692651 | 9.05E-09 | 3.24E-07 | ENSMUSG00000031822 |
| Gsg1l   | 2.766545224  | 0.48632694 | 1.28E-08 | 4.45E-07 | ENSMUSG00000046182 |
| Gsk3b   | -0.517550079 | 0.19621237 | 8.35E-03 | 3.57E-02 | ENSMUSG00000022812 |
| Gsn     | 0.891663533  | 0.10579014 | 3.50E-17 | 4.90E-15 | ENSMUSG00000026879 |

|         |              |            |          |          |                    |
|---------|--------------|------------|----------|----------|--------------------|
| Gspt1   | -0.720361487 | 0.21807347 | 9.56E-04 | 6.38E-03 | ENSMUSG00000062203 |
| Gsta4   | -1.322629238 | 0.19708795 | 1.93E-11 | 1.30E-09 | ENSMUSG00000032348 |
| Gstk1   | 0.752230634  | 0.17719167 | 2.18E-05 | 2.83E-04 | ENSMUSG00000029864 |
| Gstm1   | 0.274605448  | 0.09382385 | 3.42E-03 | 1.76E-02 | ENSMUSG00000058135 |
| Gstm2   | 0.946097545  | 0.17127633 | 3.32E-08 | 1.02E-06 | ENSMUSG00000040562 |
| Gstm4   | 0.674471386  | 0.20389344 | 9.40E-04 | 6.32E-03 | ENSMUSG00000027890 |
| Gstm7   | 2.374514581  | 0.44444368 | 9.16E-08 | 2.45E-06 | ENSMUSG00000004035 |
| Gstt3   | 0.836766784  | 0.17762266 | 2.47E-06 | 4.43E-05 | ENSMUSG00000001665 |
| Gtf2f2  | -0.560652204 | 0.18719634 | 2.74E-03 | 1.48E-02 | ENSMUSG00000067995 |
| Gtf2h1  | -1.046610162 | 0.30453531 | 5.89E-04 | 4.29E-03 | ENSMUSG00000006599 |
| Gtf2i   | 0.476118353  | 0.14886821 | 1.38E-03 | 8.55E-03 | ENSMUSG00000060261 |
| Gtpbp4  | -1.324998691 | 0.24630358 | 7.47E-08 | 2.06E-06 | ENSMUSG00000021149 |
| Guf1    | -0.90451875  | 0.35146166 | 1.01E-02 | 4.14E-02 | ENSMUSG00000029208 |
| Gusb    | 0.65729206   | 0.1658608  | 7.40E-05 | 7.92E-04 | ENSMUSG00000025534 |
| Gxylt1  | -0.593435532 | 0.22397106 | 8.06E-03 | 3.48E-02 | ENSMUSG00000036197 |
| Gxylt2  | 0.591115287  | 0.19887426 | 2.96E-03 | 1.57E-02 | ENSMUSG00000030074 |
| Gypc    | 0.550014983  | 0.20953746 | 8.67E-03 | 3.68E-02 | ENSMUSG00000090523 |
| Gys1    | 0.858091185  | 0.18347325 | 2.91E-06 | 5.10E-05 | ENSMUSG00000003865 |
| H1f0    | 0.342759642  | 0.10908313 | 1.68E-03 | 1.00E-02 | ENSMUSG00000096145 |
| H1fx    | 0.722300321  | 0.25077125 | 3.97E-03 | 1.98E-02 | ENSMUSG00000044927 |
| H2-Aa   | -0.567422626 | 0.22218666 | 1.07E-02 | 4.33E-02 | ENSMUSG00000036594 |
| H2-Eb1  | -0.761275267 | 0.30506431 | 1.26E-02 | 4.91E-02 | ENSMUSG00000060586 |
| H2-K1   | 0.669096961  | 0.15499739 | 1.58E-05 | 2.17E-04 | ENSMUSG00000061232 |
| H2-T22  | 0.68575093   | 0.24634946 | 5.38E-03 | 2.54E-02 | ENSMUSG00000056116 |
| H2afj   | 0.44398734   | 0.1161139  | 1.31E-04 | 1.25E-03 | ENSMUSG00000060032 |
| H2afz   | -0.449988554 | 0.14512354 | 1.93E-03 | 1.11E-02 | ENSMUSG00000037894 |
| Hacd1   | 0.540301633  | 0.13146816 | 3.96E-05 | 4.70E-04 | ENSMUSG00000063275 |
| Hacd4   | 1.349374774  | 0.39589083 | 6.53E-04 | 4.68E-03 | ENSMUSG00000028497 |
| Hadh    | 0.514007983  | 0.12388691 | 3.34E-05 | 4.07E-04 | ENSMUSG00000027984 |
| Hadha   | 0.466971441  | 0.13620886 | 6.07E-04 | 4.39E-03 | ENSMUSG00000025745 |
| Haghl   | 1.288439266  | 0.24527077 | 1.50E-07 | 3.77E-06 | ENSMUSG00000061046 |
| Hand2   | 1.281977089  | 0.42878842 | 2.79E-03 | 1.50E-02 | ENSMUSG00000038193 |
| Hapln1  | 1.006465698  | 0.16458629 | 9.65E-10 | 4.38E-08 | ENSMUSG00000021613 |
| Haus3   | -0.868179381 | 0.32804541 | 8.13E-03 | 3.50E-02 | ENSMUSG00000079555 |
| Haus6   | -1.520053695 | 0.43959404 | 5.44E-04 | 4.02E-03 | ENSMUSG00000038047 |
| Hbp1    | -0.359185344 | 0.14429558 | 1.28E-02 | 4.97E-02 | ENSMUSG00000002996 |
| Hbs1l   | -0.760264574 | 0.16504978 | 4.10E-06 | 6.83E-05 | ENSMUSG00000019977 |
| Hcfc1r1 | 0.304049507  | 0.09726844 | 1.77E-03 | 1.04E-02 | ENSMUSG00000023904 |
| Hcn2    | 1.784856115  | 0.58889633 | 2.44E-03 | 1.35E-02 | ENSMUSG00000020331 |
| Hdac10  | 1.12262574   | 0.35259968 | 1.45E-03 | 8.89E-03 | ENSMUSG00000062906 |
| Hdac2   | -0.863900396 | 0.19008867 | 5.50E-06 | 8.75E-05 | ENSMUSG00000019777 |
| Hdac5   | 0.556112962  | 0.16491693 | 7.46E-04 | 5.23E-03 | ENSMUSG00000008855 |
| Hdhd3   | 1.334049245  | 0.41770001 | 1.40E-03 | 8.65E-03 | ENSMUSG00000038422 |

|           |              |            |          |          |                    |
|-----------|--------------|------------|----------|----------|--------------------|
| Hdlbp     | -0.379080043 | 0.13761052 | 5.87E-03 | 2.72E-02 | ENSMUSG00000034088 |
| Heatr1    | -0.846625059 | 0.29019617 | 3.53E-03 | 1.81E-02 | ENSMUSG00000050244 |
| Hebp1     | 0.660649816  | 0.16852519 | 8.85E-05 | 9.09E-04 | ENSMUSG00000042770 |
| Hebp2     | 0.486037201  | 0.15174415 | 1.36E-03 | 8.45E-03 | ENSMUSG00000019853 |
| Heca      | -0.888855438 | 0.25346904 | 4.54E-04 | 3.46E-03 | ENSMUSG00000039879 |
| Hectd1    | -0.924929299 | 0.20167769 | 4.51E-06 | 7.44E-05 | ENSMUSG00000035247 |
| Hectd3    | 0.67351867   | 0.22234227 | 2.45E-03 | 1.35E-02 | ENSMUSG00000046861 |
| Heph      | -1.528407648 | 0.45849755 | 8.58E-04 | 5.87E-03 | ENSMUSG00000031209 |
| Herc1     | -1.050831836 | 0.30186476 | 4.99E-04 | 3.74E-03 | ENSMUSG00000038664 |
| Herc4     | -0.999294742 | 0.26690803 | 1.81E-04 | 1.62E-03 | ENSMUSG00000020064 |
| Herpud2   | -0.600333006 | 0.16644227 | 3.10E-04 | 2.53E-03 | ENSMUSG00000008429 |
| Hes1      | 1.49379532   | 0.27325663 | 4.59E-08 | 1.34E-06 | ENSMUSG00000022528 |
| Hexim1    | 1.077338158  | 0.19219597 | 2.08E-08 | 6.70E-07 | ENSMUSG00000048878 |
| Hey1      | 1.18584223   | 0.29806167 | 6.93E-05 | 7.50E-04 | ENSMUSG00000040289 |
| Hgsnat    | 0.739974012  | 0.15319517 | 1.36E-06 | 2.65E-05 | ENSMUSG00000037260 |
| Hhat      | 1.216595065  | 0.38981254 | 1.80E-03 | 1.06E-02 | ENSMUSG00000037375 |
| Hhipl1    | 0.927420353  | 0.21292957 | 1.33E-05 | 1.86E-04 | ENSMUSG00000021260 |
| Hif1a     | -0.726362201 | 0.1580309  | 4.30E-06 | 7.12E-05 | ENSMUSG00000021109 |
| Hif1an    | 0.621595879  | 0.21417348 | 3.70E-03 | 1.88E-02 | ENSMUSG00000036450 |
| Hist1h1c  | 0.53271209   | 0.12858268 | 3.43E-05 | 4.15E-04 | ENSMUSG00000036181 |
| Hk1       | 0.378178166  | 0.13459928 | 4.96E-03 | 2.38E-02 | ENSMUSG00000037012 |
| Hltf      | -1.677317478 | 0.53398972 | 1.68E-03 | 1.00E-02 | ENSMUSG00000002428 |
| Hlx       | 0.889663771  | 0.16606332 | 8.44E-08 | 2.28E-06 | ENSMUSG00000039377 |
| Hmga1     | -2.445969573 | 0.5030763  | 1.16E-06 | 2.30E-05 | ENSMUSG00000046711 |
| Hmga2     | -1.667200762 | 0.15075852 | 1.99E-28 | 9.03E-26 | ENSMUSG00000056758 |
| Hmgcr     | 0.65083468   | 0.26084313 | 1.26E-02 | 4.91E-02 | ENSMUSG00000021670 |
| Hmgcs2    | 3.283901158  | 0.24670399 | 2.00E-40 | 2.63E-37 | ENSMUSG00000027875 |
| Hmgn3     | 0.668687916  | 0.13112284 | 3.40E-07 | 7.76E-06 | ENSMUSG00000066456 |
| Hmgn5     | -1.340602669 | 0.29783311 | 6.76E-06 | 1.05E-04 | ENSMUSG00000031245 |
| Hmox1     | -1.015289098 | 0.119064   | 1.50E-17 | 2.14E-15 | ENSMUSG00000005413 |
| Hnrnpa3   | -0.980211516 | 0.27083586 | 2.96E-04 | 2.43E-03 | ENSMUSG00000059005 |
| Hnrnpc    | -0.359871916 | 0.1199328  | 2.69E-03 | 1.46E-02 | ENSMUSG00000060373 |
| Hnrnpdl   | -0.953977753 | 0.13399141 | 1.08E-12 | 8.63E-11 | ENSMUSG00000029328 |
| Hnrnp1    | 0.612697221  | 0.13806035 | 9.08E-06 | 1.34E-04 | ENSMUSG00000015165 |
| Hnrnpu    | -0.729246829 | 0.13703889 | 1.03E-07 | 2.70E-06 | ENSMUSG00000039630 |
| Hopx      | 0.826400923  | 0.28110931 | 3.28E-03 | 1.70E-02 | ENSMUSG00000059325 |
| Hoxa6-201 | -1.117226476 | 0.30562094 | 2.57E-04 | 2.16E-03 | ENSMUSG00000116858 |
| Hpf1      | -0.738415181 | 0.23207901 | 1.46E-03 | 8.93E-03 | ENSMUSG00000038005 |
| Hpgd      | 1.204463959  | 0.35849268 | 7.80E-04 | 5.43E-03 | ENSMUSG00000031613 |
| Hprt      | -0.443771279 | 0.13730788 | 1.23E-03 | 7.84E-03 | ENSMUSG00000025630 |
| Hps1      | 0.793093411  | 0.23301135 | 6.65E-04 | 4.73E-03 | ENSMUSG00000025188 |
| Hps3      | -1.477416347 | 0.41641953 | 3.88E-04 | 3.04E-03 | ENSMUSG00000027615 |
| Hps4      | 0.618979249  | 0.24829929 | 1.27E-02 | 4.93E-02 | ENSMUSG00000042328 |

|          |              |            |          |          |                     |
|----------|--------------|------------|----------|----------|---------------------|
| Hpse     | 1.517820402  | 0.40651279 | 1.89E-04 | 1.68E-03 | ENSMUSG00000035273  |
| Hr       | 1.628699932  | 0.16785364 | 2.92E-22 | 7.26E-20 | ENSMUSG00000022096  |
| Hsd17b11 | 0.676148699  | 0.17332496 | 9.58E-05 | 9.71E-04 | ENSMUSG00000029311  |
| Hsp90aa1 | -1.207423544 | 0.24297772 | 6.72E-07 | 1.42E-05 | ENSMUSG00000021270  |
| Hspa4    | -0.796639009 | 0.16420478 | 1.23E-06 | 2.40E-05 | ENSMUSG00000020361  |
| Hspa4l   | -2.35394267  | 0.65742298 | 3.43E-04 | 2.74E-03 | ENSMUSG00000025757  |
| Hspa8    | -0.3823279   | 0.1299568  | 3.26E-03 | 1.70E-02 | ENSMUSG00000015656  |
| Hspa9    | -1.05435389  | 0.12721313 | 1.15E-16 | 1.50E-14 | ENSMUSG00000024359  |
| Hspb7    | -0.496706446 | 0.17238768 | 3.96E-03 | 1.98E-02 | ENSMUSG00000006221  |
| Hspbp1   | 0.477201358  | 0.16192818 | 3.21E-03 | 1.68E-02 | ENSMUSG000000063802 |
| Hspd1    | -1.099661516 | 0.2076328  | 1.18E-07 | 3.06E-06 | ENSMUSG00000025980  |
| Hspe1    | -0.639563597 | 0.13342464 | 1.64E-06 | 3.12E-05 | ENSMUSG00000073676  |
| Hspg2    | 0.917804832  | 0.1444735  | 2.11E-10 | 1.13E-08 | ENSMUSG00000028763  |
| Hsph1    | -1.124438945 | 0.15502766 | 4.07E-13 | 3.55E-11 | ENSMUSG00000029657  |
| Htati2   | -0.449339294 | 0.13077966 | 5.91E-04 | 4.30E-03 | ENSMUSG00000039745  |
| Htra3    | 1.308028873  | 0.14056288 | 1.33E-20 | 2.58E-18 | ENSMUSG00000029096  |
| Hyal2    | 0.976803003  | 0.24676086 | 7.54E-05 | 8.01E-04 | ENSMUSG00000010047  |
| lah1     | 0.635132056  | 0.19088164 | 8.77E-04 | 5.97E-03 | ENSMUSG000000062054 |
| lars     | -0.794419447 | 0.15859016 | 5.46E-07 | 1.19E-05 | ENSMUSG000000037851 |
| lbtk     | -0.890197627 | 0.21915969 | 4.87E-05 | 5.58E-04 | ENSMUSG000000035941 |
| ld3      | 1.387649929  | 0.12345437 | 2.59E-29 | 1.42E-26 | ENSMUSG00000007872  |
| lde      | -0.945639414 | 0.23995125 | 8.12E-05 | 8.49E-04 | ENSMUSG000000056999 |
| ldh1     | 0.439999374  | 0.12662433 | 5.11E-04 | 3.82E-03 | ENSMUSG000000025950 |
| ldh3g    | 0.413844189  | 0.13756318 | 2.63E-03 | 1.43E-02 | ENSMUSG00000002010  |
| ler3     | -0.379742299 | 0.13971252 | 6.57E-03 | 2.97E-02 | ENSMUSG000000003541 |
| ler5     | -0.534074859 | 0.14058351 | 1.45E-04 | 1.36E-03 | ENSMUSG000000056708 |
| ler5l    | 0.798251311  | 0.20098278 | 7.13E-05 | 7.69E-04 | ENSMUSG000000089762 |
| lfi27    | 1.040220428  | 0.15414456 | 1.50E-11 | 1.03E-09 | ENSMUSG000000064215 |
| lfitm2   | 0.49760406   | 0.12800656 | 1.01E-04 | 1.01E-03 | ENSMUSG000000060591 |
| lfitm5   | 2.340187205  | 0.26988239 | 4.28E-18 | 6.79E-16 | ENSMUSG000000025489 |
| lfrd1    | -1.300862452 | 0.13781642 | 3.76E-21 | 7.86E-19 | ENSMUSG000000001627 |
| lft22    | 0.729504614  | 0.21280516 | 6.08E-04 | 4.40E-03 | ENSMUSG00000007987  |
| lft27    | 0.937525303  | 0.20562557 | 5.13E-06 | 8.26E-05 | ENSMUSG000000016637 |
| lft46    | 0.477291225  | 0.16059177 | 2.96E-03 | 1.57E-02 | ENSMUSG000000002031 |
| lgf1     | 0.410651554  | 0.12672484 | 1.19E-03 | 7.67E-03 | ENSMUSG000000020053 |
| lgf2bp2  | -0.935400475 | 0.24659297 | 1.49E-04 | 1.38E-03 | ENSMUSG000000033581 |
| lgfbp4   | 0.830074107  | 0.12016126 | 4.92E-12 | 3.59E-10 | ENSMUSG000000017493 |
| lgfbp5   | 0.719492154  | 0.13919151 | 2.35E-07 | 5.58E-06 | ENSMUSG000000026185 |
| lgfbp6   | -0.4947326   | 0.11923509 | 3.34E-05 | 4.07E-04 | ENSMUSG000000023046 |
| lgfbp7   | 0.300608239  | 0.09878568 | 2.34E-03 | 1.30E-02 | ENSMUSG000000036256 |
| lgjp     | -0.786431621 | 0.23145177 | 6.79E-04 | 4.82E-03 | ENSMUSG000000109901 |
| lgsf3    | 0.709579762  | 0.14445031 | 9.00E-07 | 1.85E-05 | ENSMUSG000000042035 |
| lgtp     | 1.406542383  | 0.38770315 | 2.86E-04 | 2.36E-03 | ENSMUSG000000078853 |

|         |              |            |          |          |                    |
|---------|--------------|------------|----------|----------|--------------------|
| lhh     | 3.068278703  | 0.3285714  | 9.79E-21 | 1.95E-18 | ENSMUSG00000006538 |
| lk      | -0.724201964 | 0.17888988 | 5.16E-05 | 5.88E-04 | ENSMUSG00000024474 |
| lkbip   | -0.672785633 | 0.18719145 | 3.26E-04 | 2.64E-03 | ENSMUSG00000019975 |
| lkzf5   | -0.804101855 | 0.28172021 | 4.31E-03 | 2.13E-02 | ENSMUSG00000040167 |
| ll11ra1 | 0.70646411   | 0.14473978 | 1.06E-06 | 2.12E-05 | ENSMUSG00000073889 |
| ll13ra1 | -0.998481647 | 0.24498059 | 4.59E-05 | 5.33E-04 | ENSMUSG00000017057 |
| ll16    | 1.23581814   | 0.32299105 | 1.30E-04 | 1.24E-03 | ENSMUSG00000001741 |
| ll17rc  | 0.851839007  | 0.23575181 | 3.02E-04 | 2.48E-03 | ENSMUSG00000030281 |
| ll1rl1  | -1.477838423 | 0.27582213 | 8.42E-08 | 2.28E-06 | ENSMUSG00000026069 |
| ll6st   | -0.386251867 | 0.13004494 | 2.98E-03 | 1.58E-02 | ENSMUSG00000021756 |
| llk     | 0.498747997  | 0.12272995 | 4.83E-05 | 5.56E-04 | ENSMUSG00000030890 |
| llvbl   | 0.684156521  | 0.15862177 | 1.61E-05 | 2.20E-04 | ENSMUSG00000032763 |
| lmp3    | -0.494353685 | 0.10698445 | 3.82E-06 | 6.46E-05 | ENSMUSG00000032288 |
| lmpad1  | -0.729115293 | 0.15165696 | 1.53E-06 | 2.93E-05 | ENSMUSG00000066324 |
| lnafm2  | 0.574885979  | 0.20826336 | 5.77E-03 | 2.68E-02 | ENSMUSG00000074918 |
| lnca1   | 1.306659786  | 0.4341834  | 2.62E-03 | 1.42E-02 | ENSMUSG00000057054 |
| lng1    | -0.447552424 | 0.14131857 | 1.54E-03 | 9.33E-03 | ENSMUSG00000045969 |
| lnhba   | -1.048372226 | 0.20338018 | 2.54E-07 | 5.98E-06 | ENSMUSG00000041324 |
| lnhbb   | 0.819321492  | 0.24609707 | 8.71E-04 | 5.94E-03 | ENSMUSG00000037035 |
| lnmt    | 4.199283768  | 0.83431455 | 4.82E-07 | 1.06E-05 | ENSMUSG00000003477 |
| lnpp5e  | 0.696314828  | 0.26184933 | 7.83E-03 | 3.40E-02 | ENSMUSG00000026925 |
| lnppl1  | 0.387713035  | 0.12362611 | 1.71E-03 | 1.01E-02 | ENSMUSG00000032737 |
| lnsc    | 3.234161774  | 0.62226975 | 2.02E-07 | 4.90E-06 | ENSMUSG00000048782 |
| lnts6   | -0.719141721 | 0.24961617 | 3.96E-03 | 1.98E-02 | ENSMUSG00000035161 |
| lpo5    | -0.729935463 | 0.16905312 | 1.58E-05 | 2.16E-04 | ENSMUSG00000030662 |
| lpo7    | -1.530522079 | 0.2431288  | 3.07E-10 | 1.57E-08 | ENSMUSG00000066232 |
| lqgap1  | -0.561127001 | 0.12278784 | 4.88E-06 | 7.93E-05 | ENSMUSG00000030536 |
| lreb2   | -0.879960616 | 0.32190553 | 6.26E-03 | 2.86E-02 | ENSMUSG00000032293 |
| lrf2bp1 | 0.696697711  | 0.24608886 | 4.64E-03 | 2.25E-02 | ENSMUSG00000044030 |
| lrf7    | 1.372866824  | 0.40111184 | 6.20E-04 | 4.48E-03 | ENSMUSG00000025498 |
| lrs2    | -0.73859508  | 0.19699687 | 1.77E-04 | 1.60E-03 | ENSMUSG00000038894 |
| lrx3    | 1.059364804  | 0.18183337 | 5.68E-09 | 2.10E-07 | ENSMUSG00000031734 |
| lrx5    | 1.424671707  | 0.37206776 | 1.29E-04 | 1.23E-03 | ENSMUSG00000031737 |
| lslr    | 1.842963219  | 0.38561171 | 1.76E-06 | 3.33E-05 | ENSMUSG00000037206 |
| lslr2   | 1.728065576  | 0.4007698  | 1.62E-05 | 2.21E-04 | ENSMUSG00000051243 |
| lsm1    | 1.016039358  | 0.32099928 | 1.55E-03 | 9.35E-03 | ENSMUSG00000074766 |
| lsoc2a  | 0.767335697  | 0.13978001 | 4.03E-08 | 1.20E-06 | ENSMUSG00000086784 |
| ltga10  | 0.812020436  | 0.15713943 | 2.37E-07 | 5.62E-06 | ENSMUSG00000090210 |
| ltga11  | 0.81828525   | 0.17359668 | 2.43E-06 | 4.39E-05 | ENSMUSG00000032243 |
| ltga7   | 0.555353302  | 0.22284064 | 1.27E-02 | 4.94E-02 | ENSMUSG00000025348 |
| ltga9   | 1.323047365  | 0.40558564 | 1.11E-03 | 7.18E-03 | ENSMUSG00000039115 |
| ltgb2   | 1.072368993  | 0.35824066 | 2.76E-03 | 1.48E-02 | ENSMUSG00000000290 |
| ltgb5   | 1.415836236  | 0.13930955 | 2.89E-24 | 9.52E-22 | ENSMUSG00000022817 |

|          |              |            |          |          |                    |
|----------|--------------|------------|----------|----------|--------------------|
| ltgbl1   | 0.746900653  | 0.16605769 | 6.86E-06 | 1.06E-04 | ENSMUSG00000032925 |
| ltm2b    | 0.548881774  | 0.091649   | 2.11E-09 | 8.69E-08 | ENSMUSG00000022108 |
| ltm2c    | 0.450831151  | 0.12202271 | 2.20E-04 | 1.91E-03 | ENSMUSG00000026223 |
| ltpk1    | 0.913891214  | 0.29241532 | 1.78E-03 | 1.04E-02 | ENSMUSG00000057963 |
| ltpr2    | -0.758493131 | 0.2374122  | 1.40E-03 | 8.63E-03 | ENSMUSG00000030287 |
| ltpripl1 | 1.349432974  | 0.46580438 | 3.77E-03 | 1.90E-02 | ENSMUSG00000074825 |
| lvd      | 1.058516277  | 0.23499618 | 6.66E-06 | 1.03E-04 | ENSMUSG00000027332 |
| lvns1abp | -0.436115768 | 0.14783754 | 3.18E-03 | 1.67E-02 | ENSMUSG00000023150 |
| lzumo4   | 1.938239228  | 0.44702834 | 1.45E-05 | 2.01E-04 | ENSMUSG00000055862 |
| Jade1    | -0.904831071 | 0.22143855 | 4.39E-05 | 5.13E-04 | ENSMUSG00000025764 |
| Jade2    | 0.944153452  | 0.20590618 | 4.53E-06 | 7.46E-05 | ENSMUSG00000020387 |
| Jak1     | -0.650551443 | 0.12910434 | 4.68E-07 | 1.03E-05 | ENSMUSG00000028530 |
| Jak2     | -0.986924836 | 0.29349337 | 7.72E-04 | 5.39E-03 | ENSMUSG00000024789 |
| Jaml     | 1.588729755  | 0.48966481 | 1.18E-03 | 7.57E-03 | ENSMUSG00000048534 |
| Jmjd4    | 1.247763268  | 0.45802039 | 6.44E-03 | 2.92E-02 | ENSMUSG00000036819 |
| Jmjd8    | 0.92903745   | 0.2079168  | 7.88E-06 | 1.19E-04 | ENSMUSG00000025736 |
| Jmy      | -0.675141884 | 0.20702181 | 1.11E-03 | 7.20E-03 | ENSMUSG00000021690 |
| Jpt2     | -0.674121559 | 0.1807956  | 1.93E-04 | 1.71E-03 | ENSMUSG00000024165 |
| Jup      | 0.997952188  | 0.24658568 | 5.19E-05 | 5.91E-04 | ENSMUSG00000001552 |
| Kank2    | 0.69489501   | 0.1499701  | 3.59E-06 | 6.13E-05 | ENSMUSG00000032194 |
| Kank3    | 1.157628923  | 0.36954383 | 1.73E-03 | 1.02E-02 | ENSMUSG00000042099 |
| Kat8     | -0.573284764 | 0.17760299 | 1.25E-03 | 7.93E-03 | ENSMUSG00000030801 |
| Katna1   | -0.674187955 | 0.18987592 | 3.84E-04 | 3.02E-03 | ENSMUSG00000019794 |
| Katnbl1  | -0.891910156 | 0.25193461 | 4.00E-04 | 3.12E-03 | ENSMUSG00000027132 |
| Kazald1  | 1.01971407   | 0.34989875 | 3.56E-03 | 1.82E-02 | ENSMUSG00000025213 |
| Kbtbd11  | 1.564214405  | 0.59127938 | 8.16E-03 | 3.50E-02 | ENSMUSG00000055675 |
| Kcmf1    | -0.601601445 | 0.11943057 | 4.72E-07 | 1.04E-05 | ENSMUSG00000055239 |
| Kcnab3   | -1.127017259 | 0.44695135 | 1.17E-02 | 4.64E-02 | ENSMUSG00000018470 |
| Kcnd1    | 1.747256484  | 0.55634202 | 1.69E-03 | 1.00E-02 | ENSMUSG00000009731 |
| Kcne4    | 0.590720138  | 0.15320446 | 1.15E-04 | 1.12E-03 | ENSMUSG00000047330 |
| Kcnh2    | 2.06756816   | 0.79663848 | 9.45E-03 | 3.94E-02 | ENSMUSG00000038319 |
| Kcnk1    | 2.462259365  | 0.28512218 | 5.83E-18 | 9.14E-16 | ENSMUSG00000033998 |
| Kcnq1ot1 | 2.210611179  | 0.84972035 | 9.28E-03 | 3.88E-02 | ENSMUSG00000101603 |
| Kctd1    | 0.627850101  | 0.24388056 | 1.00E-02 | 4.13E-02 | ENSMUSG00000036225 |
| Kctd11   | 0.55887125   | 0.17052215 | 1.05E-03 | 6.85E-03 | ENSMUSG00000046731 |
| Kctd13   | -0.6973356   | 0.21491653 | 1.18E-03 | 7.57E-03 | ENSMUSG00000030685 |
| Kctd17   | 0.867294729  | 0.15509226 | 2.24E-08 | 7.15E-07 | ENSMUSG00000033287 |
| Kdm4b    | 0.800124066  | 0.1830347  | 1.23E-05 | 1.74E-04 | ENSMUSG00000024201 |
| Kdm5a    | -0.807284787 | 0.22024679 | 2.47E-04 | 2.10E-03 | ENSMUSG00000030180 |
| Kdm7a    | -0.798192407 | 0.26217063 | 2.33E-03 | 1.30E-02 | ENSMUSG00000042599 |
| Keap1    | 0.440316859  | 0.15091178 | 3.53E-03 | 1.81E-02 | ENSMUSG00000003308 |
| Khdc4    | -0.5169298   | 0.17970058 | 4.02E-03 | 2.00E-02 | ENSMUSG00000028060 |
| Khdrbs1  | -0.792988176 | 0.2734524  | 3.73E-03 | 1.89E-02 | ENSMUSG00000028790 |

|         |              |            |          |          |                     |
|---------|--------------|------------|----------|----------|---------------------|
| Kif21a  | -1.948502084 | 0.4220499  | 3.90E-06 | 6.54E-05 | ENSMUSG00000022629  |
| Kif2a   | -1.543173136 | 0.23385813 | 4.15E-11 | 2.65E-09 | ENSMUSG00000021693  |
| Kif3a   | -1.515288492 | 0.29147309 | 2.01E-07 | 4.87E-06 | ENSMUSG00000018395  |
| Kif5b   | -0.910854342 | 0.22972341 | 7.34E-05 | 7.86E-04 | ENSMUSG00000006740  |
| Kifc3   | 0.666534936  | 0.15600926 | 1.93E-05 | 2.57E-04 | ENSMUSG00000031788  |
| Klf2    | 0.841293474  | 0.16275054 | 2.35E-07 | 5.58E-06 | ENSMUSG000000055148 |
| Klf3    | -0.672946033 | 0.17413975 | 1.11E-04 | 1.09E-03 | ENSMUSG00000029178  |
| Klf6    | -0.856633161 | 0.22070389 | 1.04E-04 | 1.03E-03 | ENSMUSG00000000078  |
| Klf7    | -1.022459811 | 0.17500301 | 5.14E-09 | 1.93E-07 | ENSMUSG00000025959  |
| Klf9    | -1.404029867 | 0.18141357 | 9.99E-15 | 1.04E-12 | ENSMUSG000000033863 |
| Klhdc2  | -0.289614431 | 0.10535413 | 5.98E-03 | 2.75E-02 | ENSMUSG00000020978  |
| Klhdc8a | 1.927632543  | 0.49681168 | 1.04E-04 | 1.03E-03 | ENSMUSG00000042115  |
| Klhl7   | -0.824223514 | 0.31094439 | 8.03E-03 | 3.47E-02 | ENSMUSG00000028986  |
| Klk10   | 2.181772322  | 0.85570149 | 1.08E-02 | 4.37E-02 | ENSMUSG000000030693 |
| Kmt2a   | -0.667483956 | 0.22493035 | 3.00E-03 | 1.59E-02 | ENSMUSG00000002028  |
| Kmt2e   | -0.49606496  | 0.1776386  | 5.23E-03 | 2.48E-02 | ENSMUSG00000029004  |
| Knop1   | -0.529400709 | 0.14779423 | 3.41E-04 | 2.74E-03 | ENSMUSG000000030980 |
| Kpna1   | -1.249652899 | 0.22867924 | 4.64E-08 | 1.34E-06 | ENSMUSG000000022905 |
| Kpna4   | -0.816862717 | 0.228451   | 3.49E-04 | 2.79E-03 | ENSMUSG000000027782 |
| Kptn    | 1.201913622  | 0.3676632  | 1.08E-03 | 7.03E-03 | ENSMUSG00000006021  |
| Kras    | -0.8718097   | 0.23762558 | 2.44E-04 | 2.08E-03 | ENSMUSG000000030265 |
| Krba1   | 1.175880213  | 0.40572271 | 3.75E-03 | 1.90E-02 | ENSMUSG000000042810 |
| Kremen1 | 0.507519078  | 0.15960429 | 1.47E-03 | 8.98E-03 | ENSMUSG000000020393 |
| Krr1    | -1.27537945  | 0.34327342 | 2.03E-04 | 1.78E-03 | ENSMUSG000000063334 |
| Krt23   | 2.737492087  | 0.98332449 | 5.37E-03 | 2.53E-02 | ENSMUSG00000006777  |
| Krtcap2 | -0.374852068 | 0.1095035  | 6.19E-04 | 4.47E-03 | ENSMUSG000000042747 |
| Ksr1    | 0.855578207  | 0.1767023  | 1.29E-06 | 2.51E-05 | ENSMUSG00000018334  |
| Ktn1    | -1.478414306 | 0.26299387 | 1.89E-08 | 6.25E-07 | ENSMUSG000000021843 |
| L3mbtl3 | -0.920272127 | 0.34364565 | 7.41E-03 | 3.27E-02 | ENSMUSG000000039089 |
| Lactb2  | -0.604334867 | 0.22907069 | 8.33E-03 | 3.57E-02 | ENSMUSG000000025937 |
| Lage3   | 0.769749238  | 0.13982054 | 3.69E-08 | 1.11E-06 | ENSMUSG000000015289 |
| Lamb2   | 0.380473626  | 0.12443058 | 2.23E-03 | 1.25E-02 | ENSMUSG000000052911 |
| Lamc1   | -0.373691681 | 0.14252036 | 8.74E-03 | 3.71E-02 | ENSMUSG000000026478 |
| Lamc2   | -1.599005356 | 0.35705858 | 7.52E-06 | 1.15E-04 | ENSMUSG000000026479 |
| Lamp1   | 0.370709517  | 0.09829034 | 1.62E-04 | 1.48E-03 | ENSMUSG000000031447 |
| Lamtor1 | 0.550040262  | 0.15596651 | 4.21E-04 | 3.26E-03 | ENSMUSG000000030842 |
| Lamtor4 | 0.50896734   | 0.12077448 | 2.51E-05 | 3.18E-04 | ENSMUSG000000050552 |
| Laptm4a | 0.299839988  | 0.11064042 | 6.73E-03 | 3.03E-02 | ENSMUSG000000020585 |
| Larp4   | -1.134597188 | 0.32074407 | 4.04E-04 | 3.14E-03 | ENSMUSG000000023025 |
| Larp4b  | -0.938138348 | 0.21650077 | 1.47E-05 | 2.03E-04 | ENSMUSG000000033499 |
| Larp6   | 0.913492347  | 0.26543508 | 5.79E-04 | 4.23E-03 | ENSMUSG000000034839 |
| Larp7   | -0.638948544 | 0.2295824  | 5.38E-03 | 2.54E-02 | ENSMUSG000000027968 |
| Lars    | -0.810882627 | 0.18152544 | 7.93E-06 | 1.19E-04 | ENSMUSG000000024493 |

|          |              |            |          |          |                    |
|----------|--------------|------------|----------|----------|--------------------|
| Lasp1    | 0.337588677  | 0.12904327 | 8.89E-03 | 3.76E-02 | ENSMUSG00000038366 |
| Lats1    | -0.674046863 | 0.24759923 | 6.48E-03 | 2.94E-02 | ENSMUSG00000040021 |
| Layn     | -0.969080541 | 0.17627808 | 3.85E-08 | 1.16E-06 | ENSMUSG00000060594 |
| Lbh      | 0.672239928  | 0.1111906  | 1.49E-09 | 6.37E-08 | ENSMUSG00000024063 |
| Lbp      | 0.546960554  | 0.15798436 | 5.36E-04 | 3.97E-03 | ENSMUSG00000016024 |
| Lcmt2    | 1.1187462    | 0.288262   | 1.04E-04 | 1.03E-03 | ENSMUSG00000074890 |
| Lcn2     | -1.744478595 | 0.15738897 | 1.50E-28 | 7.06E-26 | ENSMUSG00000026822 |
| Lcorl    | -1.152512482 | 0.41694784 | 5.71E-03 | 2.66E-02 | ENSMUSG00000015882 |
| Ldha     | 1.070079546  | 0.11200038 | 1.24E-21 | 2.73E-19 | ENSMUSG00000063229 |
| Ldhb     | 0.790283346  | 0.28117646 | 4.94E-03 | 2.38E-02 | ENSMUSG00000030246 |
| Ldlrap1  | 0.805102215  | 0.17170672 | 2.75E-06 | 4.89E-05 | ENSMUSG00000037295 |
| Leng9    | 1.208914467  | 0.40590666 | 2.90E-03 | 1.54E-02 | ENSMUSG00000043432 |
| Leprotl1 | -0.568359646 | 0.10848044 | 1.61E-07 | 4.02E-06 | ENSMUSG00000031513 |
| Lfng     | 1.192902433  | 0.37457327 | 1.45E-03 | 8.88E-03 | ENSMUSG00000029570 |
| Lgals1   | 0.667678766  | 0.12067014 | 3.15E-08 | 9.68E-07 | ENSMUSG00000068220 |
| Lgals2   | 2.812712714  | 0.84259021 | 8.43E-04 | 5.78E-03 | ENSMUSG00000043501 |
| Lgals3   | -0.308523761 | 0.10983431 | 4.97E-03 | 2.39E-02 | ENSMUSG00000050335 |
| Lgals3bp | 1.028124502  | 0.1752562  | 4.45E-09 | 1.69E-07 | ENSMUSG00000033880 |
| Lgalsl   | -0.774615466 | 0.24104567 | 1.31E-03 | 8.21E-03 | ENSMUSG00000042363 |
| Lgi2     | -1.379078331 | 0.55349409 | 1.27E-02 | 4.94E-02 | ENSMUSG00000039252 |
| Lgi4     | 1.266979934  | 0.23539168 | 7.35E-08 | 2.04E-06 | ENSMUSG00000036560 |
| Lgmn     | 0.418950996  | 0.1469005  | 4.35E-03 | 2.14E-02 | ENSMUSG00000021190 |
| Lhfp12   | -0.353499456 | 0.14110435 | 1.22E-02 | 4.81E-02 | ENSMUSG00000045312 |
| Lifr     | 0.665620106  | 0.20716569 | 1.31E-03 | 8.22E-03 | ENSMUSG00000054263 |
| Limd2    | 0.598321648  | 0.13231341 | 6.13E-06 | 9.60E-05 | ENSMUSG00000040699 |
| Lims1    | -0.740770086 | 0.25232762 | 3.33E-03 | 1.72E-02 | ENSMUSG00000019920 |
| Lin7c    | -1.087078376 | 0.21382444 | 3.70E-07 | 8.36E-06 | ENSMUSG00000027162 |
| Lipc     | 4.860301474  | 1.15794723 | 2.70E-05 | 3.39E-04 | ENSMUSG00000032207 |
| Lipe     | 0.862858937  | 0.27494497 | 1.70E-03 | 1.01E-02 | ENSMUSG00000003123 |
| Lix1l    | 0.414808651  | 0.14555884 | 4.38E-03 | 2.15E-02 | ENSMUSG00000049288 |
| Llgl1    | 0.768423739  | 0.22978997 | 8.26E-04 | 5.68E-03 | ENSMUSG00000020536 |
| Lman1    | -0.596336405 | 0.13011105 | 4.58E-06 | 7.52E-05 | ENSMUSG00000041891 |
| Lman2    | 0.338247135  | 0.12886418 | 8.67E-03 | 3.68E-02 | ENSMUSG00000021484 |
| Lmcd1    | -1.016581911 | 0.27410297 | 2.08E-04 | 1.82E-03 | ENSMUSG00000057604 |
| Lmf1     | 0.681335678  | 0.15708982 | 1.44E-05 | 2.00E-04 | ENSMUSG00000002279 |
| Lmf2     | 0.76899815   | 0.20132121 | 1.34E-04 | 1.27E-03 | ENSMUSG00000022614 |
| Lmna     | 0.452186791  | 0.10517214 | 1.71E-05 | 2.31E-04 | ENSMUSG00000028063 |
| Loxl1    | 0.644963169  | 0.14736585 | 1.21E-05 | 1.70E-04 | ENSMUSG00000032334 |
| Loxl2    | 0.590430125  | 0.11828149 | 5.98E-07 | 1.29E-05 | ENSMUSG00000034205 |
| Loxl3    | 0.320067997  | 0.12751176 | 1.21E-02 | 4.76E-02 | ENSMUSG00000000693 |
| Lpcat3   | 0.465273528  | 0.16380114 | 4.50E-03 | 2.20E-02 | ENSMUSG00000004270 |
| Lpgat1   | -0.539216224 | 0.20080207 | 7.25E-03 | 3.21E-02 | ENSMUSG00000026623 |
| Lpin2    | -1.238823637 | 0.28893743 | 1.81E-05 | 2.41E-04 | ENSMUSG00000024052 |



|         |              |            |          |          |                    |
|---------|--------------|------------|----------|----------|--------------------|
| Lpp     | -0.739759247 | 0.2061794  | 3.33E-04 | 2.69E-03 | ENSMUSG00000033306 |
| Lppos   | -1.868596254 | 0.21672045 | 6.57E-18 | 1.01E-15 | ENSMUSG00000097772 |
| Lrfn1   | 0.625713021  | 0.23326177 | 7.31E-03 | 3.23E-02 | ENSMUSG00000030600 |
| Lrg1    | 0.828678809  | 0.20497229 | 5.28E-05 | 6.00E-04 | ENSMUSG00000037095 |
| Lrig3   | 0.40338329   | 0.15465139 | 9.10E-03 | 3.82E-02 | ENSMUSG00000020105 |
| Lrp1    | 0.971128643  | 0.12952318 | 6.49E-14 | 6.06E-12 | ENSMUSG00000040249 |
| Lrp10   | 0.487577032  | 0.16082378 | 2.43E-03 | 1.34E-02 | ENSMUSG00000022175 |
| Lrp3    | 1.429385981  | 0.29440772 | 1.20E-06 | 2.37E-05 | ENSMUSG00000001802 |
| Lrp4    | 2.194168582  | 0.30299854 | 4.44E-13 | 3.84E-11 | ENSMUSG00000027253 |
| Lrp5    | 1.194765014  | 0.25190485 | 2.11E-06 | 3.87E-05 | ENSMUSG00000024913 |
| Lrp8    | -0.838425997 | 0.32891186 | 1.08E-02 | 4.37E-02 | ENSMUSG00000028613 |
| Lrpap1  | 0.638910624  | 0.13387325 | 1.82E-06 | 3.44E-05 | ENSMUSG00000029103 |
| Lrrc14  | 0.850502718  | 0.1828733  | 3.31E-06 | 5.69E-05 | ENSMUSG00000033728 |
| Lrrc58  | -0.753978348 | 0.21306225 | 4.02E-04 | 3.13E-03 | ENSMUSG00000034158 |
| Lrrc61  | 0.791433158  | 0.31453049 | 1.19E-02 | 4.70E-02 | ENSMUSG00000073096 |
| Lrrc73  | 1.223952819  | 0.37711108 | 1.17E-03 | 7.55E-03 | ENSMUSG00000071073 |
| Lrrfip1 | -0.546068389 | 0.19115518 | 4.28E-03 | 2.11E-02 | ENSMUSG00000026305 |
| Lrrfip2 | -1.018344605 | 0.19114127 | 9.95E-08 | 2.61E-06 | ENSMUSG00000032497 |
| Lrrn4cl | 0.688213487  | 0.26264014 | 8.78E-03 | 3.72E-02 | ENSMUSG00000071656 |
| Lsm10   | 0.630903686  | 0.15698729 | 5.85E-05 | 6.51E-04 | ENSMUSG00000050188 |
| Lsm14a  | -0.725685906 | 0.15168374 | 1.72E-06 | 3.26E-05 | ENSMUSG00000066568 |
| Lsm6    | 0.538852901  | 0.149845   | 3.23E-04 | 2.62E-03 | ENSMUSG00000031683 |
| Ltbp2   | 0.61662962   | 0.17827061 | 5.42E-04 | 4.01E-03 | ENSMUSG00000002020 |
| LTO1    | 0.847129931  | 0.25947084 | 1.10E-03 | 7.12E-03 | ENSMUSG00000031072 |
| Ltv1    | -0.674514033 | 0.25405284 | 7.93E-03 | 3.44E-02 | ENSMUSG00000019814 |
| Luc7l   | -0.456418842 | 0.15476527 | 3.19E-03 | 1.67E-02 | ENSMUSG00000024188 |
| Luc7l2  | -0.529841711 | 0.16074924 | 9.80E-04 | 6.51E-03 | ENSMUSG00000029823 |
| Lxn     | 0.515935456  | 0.16054526 | 1.31E-03 | 8.21E-03 | ENSMUSG00000047557 |
| Ly6a    | 0.751877876  | 0.12907631 | 5.71E-09 | 2.11E-07 | ENSMUSG00000075602 |
| Ly6c1   | 0.479193525  | 0.13617769 | 4.33E-04 | 3.34E-03 | ENSMUSG00000079018 |
| Ly6e    | 0.493812885  | 0.1252418  | 8.05E-05 | 8.45E-04 | ENSMUSG00000022587 |
| Lyar    | -1.080652978 | 0.22988817 | 2.59E-06 | 4.64E-05 | ENSMUSG00000067367 |
| Lynx1   | 1.066928019  | 0.163895   | 7.52E-11 | 4.48E-09 | ENSMUSG00000022594 |
| Lypla2  | 0.387625474  | 0.15263933 | 1.11E-02 | 4.47E-02 | ENSMUSG00000028670 |
| Lyrm2   | 0.399941915  | 0.1535561  | 9.20E-03 | 3.86E-02 | ENSMUSG00000045854 |
| Lysmd3  | -1.233041392 | 0.36869715 | 8.25E-04 | 5.68E-03 | ENSMUSG00000035840 |
| Lyst    | -1.024460301 | 0.33455707 | 2.20E-03 | 1.23E-02 | ENSMUSG00000019726 |
| Lyz2    | 1.103311703  | 0.16511899 | 2.36E-11 | 1.54E-09 | ENSMUSG00000069516 |
| Lztf1l  | -1.011621671 | 0.30983505 | 1.09E-03 | 7.12E-03 | ENSMUSG00000025245 |
| M1ap    | -0.897538057 | 0.23468721 | 1.31E-04 | 1.25E-03 | ENSMUSG00000030041 |
| Mad1l1  | 0.509805209  | 0.20062268 | 1.10E-02 | 4.45E-02 | ENSMUSG00000029554 |
| Maf     | 0.414049397  | 0.12365252 | 8.13E-04 | 5.61E-03 | ENSMUSG00000055435 |
| Mafb    | 0.829744127  | 0.18668786 | 8.81E-06 | 1.30E-04 | ENSMUSG00000074622 |

|          |              |            |          |          |                    |
|----------|--------------|------------|----------|----------|--------------------|
| Maff     | -0.613597396 | 0.18482158 | 9.00E-04 | 6.11E-03 | ENSMUSG00000042622 |
| Maged1   | 0.401285658  | 0.11474374 | 4.70E-04 | 3.57E-03 | ENSMUSG00000025151 |
| Magee1   | 0.649543759  | 0.23450994 | 5.61E-03 | 2.62E-02 | ENSMUSG00000031227 |
| Magoh    | -0.444634367 | 0.13851662 | 1.33E-03 | 8.29E-03 | ENSMUSG00000028609 |
| Mak16    | -0.74299926  | 0.17206183 | 1.57E-05 | 2.16E-04 | ENSMUSG00000031578 |
| Malsu1   | -0.462225722 | 0.15101459 | 2.21E-03 | 1.24E-02 | ENSMUSG00000029815 |
| Maml2    | -0.691056984 | 0.26746379 | 9.77E-03 | 4.04E-02 | ENSMUSG00000031925 |
| Man1c1   | 0.791488921  | 0.19606354 | 5.42E-05 | 6.13E-04 | ENSMUSG00000037306 |
| Man2b1   | 0.879287491  | 0.17440095 | 4.61E-07 | 1.02E-05 | ENSMUSG00000005142 |
| Man2b2   | 0.858081857  | 0.2566063  | 8.26E-04 | 5.68E-03 | ENSMUSG00000029119 |
| Man2c1   | 0.665493451  | 0.22662075 | 3.32E-03 | 1.72E-02 | ENSMUSG00000032295 |
| Manf     | 0.302095787  | 0.11820245 | 1.06E-02 | 4.31E-02 | ENSMUSG00000032575 |
| Map11    | 0.818199874  | 0.23488867 | 4.95E-04 | 3.72E-03 | ENSMUSG00000036948 |
| Map1a    | 0.55430942   | 0.19448206 | 4.37E-03 | 2.15E-02 | ENSMUSG00000027254 |
| Map2k2   | 0.417722743  | 0.13460212 | 1.91E-03 | 1.11E-02 | ENSMUSG00000035027 |
| Map3k20  | -0.692415374 | 0.21492832 | 1.27E-03 | 8.05E-03 | ENSMUSG00000004085 |
| Map3k8   | -1.464890342 | 0.33615259 | 1.31E-05 | 1.84E-04 | ENSMUSG00000024235 |
| Map4k4   | -0.648260926 | 0.10590014 | 9.27E-10 | 4.27E-08 | ENSMUSG00000026074 |
| Map7d1   | 0.584700111  | 0.13128879 | 8.45E-06 | 1.25E-04 | ENSMUSG00000028849 |
| Map7d2   | -1.255585815 | 0.26943114 | 3.16E-06 | 5.48E-05 | ENSMUSG00000041020 |
| Mapk12   | -0.996173734 | 0.31048835 | 1.33E-03 | 8.32E-03 | ENSMUSG00000022610 |
| Mapk3    | 0.385126995  | 0.11441401 | 7.62E-04 | 5.34E-03 | ENSMUSG00000063065 |
| Mapk6    | -0.828267255 | 0.1984089  | 2.99E-05 | 3.69E-04 | ENSMUSG00000042688 |
| Mapk8ip1 | 1.219220512  | 0.34532472 | 4.15E-04 | 3.22E-03 | ENSMUSG00000027223 |
| 1-Mar    | 1.10789273   | 0.44384643 | 1.26E-02 | 4.90E-02 | ENSMUSG00000026621 |
| 2-Mar    | 0.330612313  | 0.13164263 | 1.20E-02 | 4.75E-02 | ENSMUSG00000079557 |
| 7-Mar    | -1.003224822 | 0.23915056 | 2.73E-05 | 3.42E-04 | ENSMUSG00000026977 |
| Marcks   | 0.422856322  | 0.13862486 | 2.29E-03 | 1.27E-02 | ENSMUSG00000069662 |
| Marf1    | -1.115632361 | 0.30563139 | 2.62E-04 | 2.20E-03 | ENSMUSG00000060657 |
| Masp1    | 1.113342363  | 0.17588011 | 2.45E-10 | 1.30E-08 | ENSMUSG00000022887 |
| Matn4    | 0.4261557    | 0.17051684 | 1.24E-02 | 4.87E-02 | ENSMUSG00000016995 |
| Matr3    | -0.956080468 | 0.25584359 | 1.86E-04 | 1.66E-03 | ENSMUSG00000037236 |
| Mavs     | 0.595654776  | 0.14597624 | 4.49E-05 | 5.24E-04 | ENSMUSG00000037523 |
| Mbnl2    | -0.93208233  | 0.31502268 | 3.09E-03 | 1.62E-02 | ENSMUSG00000022139 |
| Mboat7   | 0.561620074  | 0.14830737 | 1.53E-04 | 1.41E-03 | ENSMUSG00000035596 |
| Mbtd1    | -1.132224971 | 0.20848311 | 5.61E-08 | 1.59E-06 | ENSMUSG00000059474 |
| Mbtps1   | 0.727304199  | 0.11788591 | 6.85E-10 | 3.26E-08 | ENSMUSG00000031835 |
| Mcee     | 0.693067557  | 0.13419312 | 2.41E-07 | 5.69E-06 | ENSMUSG00000033429 |
| Mcm3     | 0.507110066  | 0.20304543 | 1.25E-02 | 4.89E-02 | ENSMUSG00000041859 |
| Mcm5     | 1.130876883  | 0.37859209 | 2.82E-03 | 1.51E-02 | ENSMUSG00000005410 |
| Mdfic    | -0.80202127  | 0.19667495 | 4.54E-05 | 5.29E-04 | ENSMUSG00000041390 |
| Mdga1    | 1.052001813  | 0.29423967 | 3.50E-04 | 2.79E-03 | ENSMUSG00000043557 |
| Mdh1     | 0.390751912  | 0.12117768 | 1.26E-03 | 7.98E-03 | ENSMUSG00000020321 |

|         |              |            |          |          |                    |
|---------|--------------|------------|----------|----------|--------------------|
| Mdk     | 0.354201075  | 0.12981374 | 6.36E-03 | 2.89E-02 | ENSMUSG00000027239 |
| Mdm2    | -0.880255318 | 0.14777112 | 2.57E-09 | 1.04E-07 | ENSMUSG00000020184 |
| Mdm4    | -1.283926401 | 0.30346137 | 2.33E-05 | 2.99E-04 | ENSMUSG00000054387 |
| Mecp2   | -0.538396489 | 0.2090602  | 1.00E-02 | 4.12E-02 | ENSMUSG00000031393 |
| Med1    | -0.593622231 | 0.18916511 | 1.70E-03 | 1.01E-02 | ENSMUSG00000018160 |
| Med10   | -0.550460879 | 0.12568383 | 1.19E-05 | 1.68E-04 | ENSMUSG00000021598 |
| Med13l  | -0.553750738 | 0.1660981  | 8.56E-04 | 5.87E-03 | ENSMUSG00000018076 |
| Med25   | 0.615540953  | 0.18084763 | 6.65E-04 | 4.73E-03 | ENSMUSG00000002968 |
| Med27   | 0.561041347  | 0.15085972 | 2.00E-04 | 1.76E-03 | ENSMUSG00000026799 |
| Med7    | -0.481696438 | 0.1838544  | 8.79E-03 | 3.72E-02 | ENSMUSG00000020397 |
| Medag   | -1.090869501 | 0.1517471  | 6.54E-13 | 5.48E-11 | ENSMUSG00000029659 |
| Mef2b   | -1.820440124 | 0.49663703 | 2.47E-04 | 2.10E-03 | ENSMUSG00000079033 |
| Mef2d   | 0.334185776  | 0.1314094  | 1.10E-02 | 4.43E-02 | ENSMUSG00000001419 |
| Meg3    | -0.720208433 | 0.26377644 | 6.33E-03 | 2.88E-02 | ENSMUSG00000021268 |
| Megf6   | 1.403627088  | 0.3012112  | 3.16E-06 | 5.48E-05 | ENSMUSG00000057751 |
| Megf8   | 0.654224277  | 0.17784372 | 2.34E-04 | 2.01E-03 | ENSMUSG00000045039 |
| Meis3   | 0.660299937  | 0.17186671 | 1.22E-04 | 1.18E-03 | ENSMUSG00000041420 |
| Mest    | 1.224732177  | 0.18148775 | 1.50E-11 | 1.03E-09 | ENSMUSG00000051855 |
| Met     | -2.291652306 | 0.42008763 | 4.89E-08 | 1.41E-06 | ENSMUSG00000009376 |
| Metap2  | -0.441630333 | 0.15543481 | 4.49E-03 | 2.20E-02 | ENSMUSG00000036112 |
| Mettl1  | -0.379632428 | 0.14883433 | 1.08E-02 | 4.36E-02 | ENSMUSG00000006732 |
| Mettl26 | 0.368806727  | 0.14524356 | 1.11E-02 | 4.47E-02 | ENSMUSG00000025731 |
| Mex3b   | -2.129413249 | 0.43678628 | 1.09E-06 | 2.18E-05 | ENSMUSG00000057706 |
| Mfap1a  | -0.984115746 | 0.36775155 | 7.45E-03 | 3.28E-02 | ENSMUSG00000068479 |
| Mfap1b  | -0.704471602 | 0.26890733 | 8.80E-03 | 3.72E-02 | ENSMUSG00000048222 |
| Mfap2   | 0.939397757  | 0.24313738 | 1.12E-04 | 1.09E-03 | ENSMUSG00000060572 |
| Mfn2    | 0.558365122  | 0.18225166 | 2.19E-03 | 1.23E-02 | ENSMUSG00000029020 |
| Mfsd10  | 0.576161177  | 0.13301236 | 1.48E-05 | 2.04E-04 | ENSMUSG00000001082 |
| Mfsd11  | 0.749209413  | 0.17724729 | 2.37E-05 | 3.03E-04 | ENSMUSG00000020818 |
| Mfsd3   | 1.353700432  | 0.25371734 | 9.53E-08 | 2.53E-06 | ENSMUSG00000019080 |
| Mfsd4b4 | 0.314120434  | 0.10252361 | 2.18E-03 | 1.23E-02 | ENSMUSG00000096210 |
| Mfsd5   | 0.319642352  | 0.11282457 | 4.61E-03 | 2.24E-02 | ENSMUSG00000045665 |
| Mfsd6   | -2.272846814 | 0.45678403 | 6.50E-07 | 1.38E-05 | ENSMUSG00000041439 |
| Mga     | -1.367551904 | 0.27850203 | 9.09E-07 | 1.86E-05 | ENSMUSG00000033943 |
| Mgarp   | 1.208101982  | 0.20378894 | 3.06E-09 | 1.21E-07 | ENSMUSG00000037161 |
| Mgat1   | 0.516337279  | 0.16561006 | 1.82E-03 | 1.06E-02 | ENSMUSG00000020346 |
| Mgat2   | 0.641330353  | 0.25600191 | 1.22E-02 | 4.81E-02 | ENSMUSG00000043998 |
| Mgat3   | 2.295023058  | 0.65958736 | 5.02E-04 | 3.76E-03 | ENSMUSG00000042428 |
| Mgll    | 1.402846808  | 0.19613892 | 8.53E-13 | 6.93E-11 | ENSMUSG00000033174 |
| Mgmt    | 0.589393552  | 0.17072986 | 5.56E-04 | 4.09E-03 | ENSMUSG00000054612 |
| Mgp     | 0.540047664  | 0.11960671 | 6.33E-06 | 9.88E-05 | ENSMUSG00000030218 |
| Mgrn1   | 0.868415709  | 0.15121516 | 9.31E-09 | 3.33E-07 | ENSMUSG00000022517 |
| Mgst1   | 0.840119617  | 0.13752807 | 1.00E-09 | 4.49E-08 | ENSMUSG00000008540 |

|           |              |            |          |          |                    |
|-----------|--------------|------------|----------|----------|--------------------|
| Mgst3     | 1.31802306   | 0.20474366 | 1.22E-10 | 6.81E-09 | ENSMUSG00000026688 |
| Mia2      | -1.055383771 | 0.20849524 | 4.15E-07 | 9.29E-06 | ENSMUSG00000021000 |
| Mia3      | -0.604004452 | 0.20698073 | 3.52E-03 | 1.81E-02 | ENSMUSG00000056050 |
| Miat      | 1.717083012  | 0.67614531 | 1.11E-02 | 4.47E-02 | ENSMUSG00000097750 |
| Mib1      | -0.841263807 | 0.24654133 | 6.44E-04 | 4.62E-03 | ENSMUSG00000024294 |
| Mical1    | 0.58598089   | 0.20442341 | 4.15E-03 | 2.06E-02 | ENSMUSG00000019823 |
| Midn      | 0.503126419  | 0.12362745 | 4.71E-05 | 5.45E-04 | ENSMUSG00000035621 |
| Mier1     | -0.596598228 | 0.22694405 | 8.57E-03 | 3.65E-02 | ENSMUSG00000028522 |
| Mif4gd    | 0.914100847  | 0.19792592 | 3.87E-06 | 6.51E-05 | ENSMUSG00000020743 |
| Minpp1    | 0.994208822  | 0.36914211 | 7.07E-03 | 3.15E-02 | ENSMUSG00000024896 |
| Mipol1    | -1.342781674 | 0.32090836 | 2.86E-05 | 3.56E-04 | ENSMUSG00000047022 |
| Mir5136   | 0.674230003  | 0.24586882 | 6.10E-03 | 2.80E-02 | ENSMUSG00000092486 |
| Mir703    | -0.710235595 | 0.22833744 | 1.87E-03 | 1.09E-02 | ENSMUSG00000105748 |
| Mkln1     | -0.652659872 | 0.23040462 | 4.62E-03 | 2.24E-02 | ENSMUSG00000025609 |
| Mkm2      | -0.534875103 | 0.18615756 | 4.06E-03 | 2.02E-02 | ENSMUSG00000000439 |
| Mlec      | 0.549372021  | 0.12387973 | 9.22E-06 | 1.35E-04 | ENSMUSG00000048578 |
| Mlf1      | -2.137699957 | 0.65096697 | 1.02E-03 | 6.72E-03 | ENSMUSG00000048416 |
| Mllt3     | -1.008235081 | 0.3093341  | 1.12E-03 | 7.24E-03 | ENSMUSG00000028496 |
| Mlph      | 1.655538712  | 0.65405288 | 1.14E-02 | 4.54E-02 | ENSMUSG00000026303 |
| Mlst8     | 0.873266546  | 0.26418214 | 9.48E-04 | 6.34E-03 | ENSMUSG00000024142 |
| Mmgt1     | -0.618255388 | 0.24300114 | 1.10E-02 | 4.42E-02 | ENSMUSG00000061273 |
| Mmp11     | 0.514592282  | 0.16030427 | 1.33E-03 | 8.29E-03 | ENSMUSG00000000901 |
| Mmp14     | 0.617248014  | 0.12905978 | 1.73E-06 | 3.28E-05 | ENSMUSG00000000957 |
| Mmp19     | 0.700778011  | 0.1307839  | 8.40E-08 | 2.28E-06 | ENSMUSG00000025355 |
| Mmp2      | 0.35751808   | 0.10264481 | 4.96E-04 | 3.72E-03 | ENSMUSG00000031740 |
| Mmp23     | 0.577083422  | 0.19851499 | 3.65E-03 | 1.85E-02 | ENSMUSG00000029061 |
| Mmp3      | -1.638043581 | 0.40255746 | 4.72E-05 | 5.45E-04 | ENSMUSG00000043613 |
| Mob4      | -0.573684499 | 0.14496057 | 7.57E-05 | 8.03E-04 | ENSMUSG00000025979 |
| Mocs3     | 0.687468308  | 0.23672968 | 3.68E-03 | 1.87E-02 | ENSMUSG00000074576 |
| Mon1a     | 0.868146941  | 0.22979763 | 1.58E-04 | 1.45E-03 | ENSMUSG00000032583 |
| Mon2      | -0.609113582 | 0.1739643  | 4.63E-04 | 3.52E-03 | ENSMUSG00000034602 |
| Morc3     | -1.074294981 | 0.33980069 | 1.57E-03 | 9.45E-03 | ENSMUSG00000039456 |
| Morc4     | -0.581762546 | 0.21942908 | 8.02E-03 | 3.47E-02 | ENSMUSG00000031434 |
| Morf4l1   | -1.300563995 | 0.2057452  | 2.59E-10 | 1.36E-08 | ENSMUSG00000062270 |
| Morn2     | 1.33210542   | 0.23561962 | 1.57E-08 | 5.27E-07 | ENSMUSG00000045257 |
| Mospd1    | -1.07567301  | 0.26539817 | 5.06E-05 | 5.77E-04 | ENSMUSG00000023074 |
| Mpc2      | 0.349080478  | 0.1142606  | 2.25E-03 | 1.26E-02 | ENSMUSG00000026568 |
| Mpdu1     | 0.739912562  | 0.14142876 | 1.68E-07 | 4.17E-06 | ENSMUSG00000018761 |
| Mpdz      | -1.259868176 | 0.42335905 | 2.92E-03 | 1.55E-02 | ENSMUSG00000028402 |
| Mpg       | 0.497881697  | 0.18810684 | 8.13E-03 | 3.49E-02 | ENSMUSG00000020287 |
| Mphosph10 | -1.088123143 | 0.34394854 | 1.56E-03 | 9.39E-03 | ENSMUSG00000030521 |
| Mphosph8  | -1.300916795 | 0.26330102 | 7.78E-07 | 1.62E-05 | ENSMUSG00000079184 |
| Mpp5      | -1.438234226 | 0.30293363 | 2.06E-06 | 3.81E-05 | ENSMUSG00000021112 |

|         |              |            |          |          |                    |
|---------|--------------|------------|----------|----------|--------------------|
| Mpp6    | -0.957454593 | 0.22052453 | 1.41E-05 | 1.96E-04 | ENSMUSG00000038388 |
| Mprp    | 0.385781941  | 0.10498975 | 2.38E-04 | 2.04E-03 | ENSMUSG00000005417 |
| Mrc2    | 0.758758395  | 0.13307759 | 1.19E-08 | 4.15E-07 | ENSMUSG00000020695 |
| Mrgprf  | 1.476031946  | 0.23484559 | 3.28E-10 | 1.66E-08 | ENSMUSG00000031070 |
| Mrpl1   | -1.642138674 | 0.30447967 | 6.92E-08 | 1.93E-06 | ENSMUSG00000029486 |
| Mrpl12  | -0.433120641 | 0.12476703 | 5.18E-04 | 3.85E-03 | ENSMUSG00000039640 |
| Mrpl13  | -0.328207864 | 0.13051781 | 1.19E-02 | 4.71E-02 | ENSMUSG00000022370 |
| Mrpl20  | 0.545548074  | 0.11380549 | 1.64E-06 | 3.12E-05 | ENSMUSG00000029066 |
| Mrpl30  | -0.530004056 | 0.11910973 | 8.60E-06 | 1.27E-04 | ENSMUSG00000026087 |
| Mrpl32  | -0.447801057 | 0.15072309 | 2.97E-03 | 1.57E-02 | ENSMUSG00000015672 |
| Mrpl35  | -0.397846753 | 0.12840448 | 1.95E-03 | 1.12E-02 | ENSMUSG00000052962 |
| Mrpl46  | -0.537758849 | 0.19833958 | 6.70E-03 | 3.02E-02 | ENSMUSG00000030612 |
| Mrpl47  | -0.997050635 | 0.18013705 | 3.11E-08 | 9.60E-07 | ENSMUSG00000037531 |
| Mrpl51  | 0.434902333  | 0.1436973  | 2.47E-03 | 1.36E-02 | ENSMUSG00000030335 |
| Mrpl54  | 0.404846303  | 0.13768316 | 3.28E-03 | 1.70E-02 | ENSMUSG00000034932 |
| Mrps11  | 0.646212921  | 0.21977137 | 3.28E-03 | 1.70E-02 | ENSMUSG00000030611 |
| Mrps12  | 0.558047475  | 0.14607879 | 1.33E-04 | 1.26E-03 | ENSMUSG00000045948 |
| Mrps22  | -0.460553824 | 0.15969647 | 3.93E-03 | 1.97E-02 | ENSMUSG00000032459 |
| Mrps30  | -0.369310452 | 0.13747519 | 7.22E-03 | 3.21E-02 | ENSMUSG00000021731 |
| Mrps9   | -0.579397312 | 0.16756846 | 5.45E-04 | 4.02E-03 | ENSMUSG00000060679 |
| Mrto4   | -0.576948706 | 0.13260946 | 1.36E-05 | 1.89E-04 | ENSMUSG00000028741 |
| Ms4a6b  | 2.346961374  | 0.53225824 | 1.04E-05 | 1.50E-04 | ENSMUSG00000024677 |
| Ms4a6c  | 2.107702538  | 0.48421938 | 1.34E-05 | 1.88E-04 | ENSMUSG00000079419 |
| Ms4a6d  | 1.536628317  | 0.24130015 | 1.91E-10 | 1.03E-08 | ENSMUSG00000024679 |
| Ms4a8a  | 2.638154861  | 0.77487031 | 6.63E-04 | 4.72E-03 | ENSMUSG00000024730 |
| Msh5    | 2.843699393  | 0.81942179 | 5.20E-04 | 3.87E-03 | ENSMUSG00000007035 |
| Msi2    | -0.386755182 | 0.15232286 | 1.11E-02 | 4.47E-02 | ENSMUSG00000069769 |
| Msl2    | -0.789290229 | 0.30916835 | 1.07E-02 | 4.34E-02 | ENSMUSG00000066415 |
| Msmo1   | -0.397571981 | 0.1320902  | 2.61E-03 | 1.42E-02 | ENSMUSG00000031604 |
| Msn     | -0.263437351 | 0.10389779 | 1.12E-02 | 4.50E-02 | ENSMUSG00000031207 |
| Msr     | 1.16927587   | 0.3670476  | 1.44E-03 | 8.87E-03 | ENSMUSG00000054733 |
| Msrb1   | 0.642789089  | 0.14489806 | 9.16E-06 | 1.35E-04 | ENSMUSG00000075705 |
| Msrb2   | 0.791598629  | 0.30540238 | 9.54E-03 | 3.97E-02 | ENSMUSG00000023094 |
| mt-Cytb | -0.341550829 | 0.13360509 | 1.06E-02 | 4.30E-02 | ENSMUSG00000064370 |
| mt-Nd4  | -0.508718187 | 0.151118   | 7.65E-04 | 5.35E-03 | ENSMUSG00000064363 |
| mt-Nd6  | -0.313128904 | 0.10695392 | 3.41E-03 | 1.76E-02 | ENSMUSG00000064368 |
| mt-Ti   | 0.439944562  | 0.16605233 | 8.06E-03 | 3.48E-02 | ENSMUSG00000064342 |
| mt-Tl2  | 0.334739741  | 0.11490253 | 3.58E-03 | 1.83E-02 | ENSMUSG00000064366 |
| Mt1     | -1.196290924 | 0.09859964 | 7.08E-34 | 4.90E-31 | ENSMUSG00000031765 |
| Mt2     | -1.215324929 | 0.09633213 | 1.72E-36 | 1.51E-33 | ENSMUSG00000031762 |
| Mt3     | -1.596386335 | 0.49722397 | 1.32E-03 | 8.28E-03 | ENSMUSG00000031760 |
| Mtap    | -0.576540344 | 0.1599999  | 3.14E-04 | 2.56E-03 | ENSMUSG00000062937 |
| Mtch1   | 0.61375214   | 0.11199806 | 4.25E-08 | 1.26E-06 | ENSMUSG00000024012 |

|          |              |            |          |          |                    |
|----------|--------------|------------|----------|----------|--------------------|
| Mtdh     | -0.917546577 | 0.183573   | 5.78E-07 | 1.25E-05 | ENSMUSG00000022255 |
| Mthfd2   | -0.354533286 | 0.13041346 | 6.56E-03 | 2.96E-02 | ENSMUSG00000005667 |
| Mthfr    | 0.7549149    | 0.23511691 | 1.32E-03 | 8.28E-03 | ENSMUSG00000029009 |
| Mthfs    | 0.839771365  | 0.29940303 | 5.03E-03 | 2.41E-02 | ENSMUSG00000066442 |
| Mthfsd   | 0.76728387   | 0.19314354 | 7.11E-05 | 7.66E-04 | ENSMUSG00000031816 |
| Mtln     | -0.417103766 | 0.13228623 | 1.62E-03 | 9.68E-03 | ENSMUSG00000051319 |
| Mtm1     | -1.308238777 | 0.48393814 | 6.87E-03 | 3.08E-02 | ENSMUSG00000031337 |
| Mtmr11   | 0.690717165  | 0.24431566 | 4.70E-03 | 2.28E-02 | ENSMUSG00000045934 |
| Mtmr6    | -0.738176901 | 0.22325243 | 9.45E-04 | 6.33E-03 | ENSMUSG00000021987 |
| Mtpap    | -0.752424157 | 0.29477357 | 1.07E-02 | 4.34E-02 | ENSMUSG00000024234 |
| Mtpn     | -0.534177965 | 0.12915529 | 3.54E-05 | 4.25E-04 | ENSMUSG00000029840 |
| Mtrex    | -0.883114437 | 0.17164209 | 2.67E-07 | 6.25E-06 | ENSMUSG00000016018 |
| Mtss1l   | 0.702225376  | 0.161691   | 1.41E-05 | 1.95E-04 | ENSMUSG00000033763 |
| Mturn    | 0.960903005  | 0.33962299 | 4.66E-03 | 2.26E-02 | ENSMUSG00000038065 |
| Mvk      | 1.077454103  | 0.2065177  | 1.82E-07 | 4.46E-06 | ENSMUSG00000041939 |
| Mxd4     | 0.804730601  | 0.1389076  | 6.90E-09 | 2.51E-07 | ENSMUSG00000037235 |
| Mxra8    | 0.942907874  | 0.12295904 | 1.74E-14 | 1.72E-12 | ENSMUSG00000029070 |
| Mycbp2   | -1.17528879  | 0.22099357 | 1.05E-07 | 2.74E-06 | ENSMUSG00000033004 |
| Myh9     | 0.488693019  | 0.12560203 | 9.99E-05 | 1.00E-03 | ENSMUSG00000022443 |
| Myl6     | 0.723333314  | 0.19306294 | 1.79E-04 | 1.61E-03 | ENSMUSG00000090841 |
| Myl6b    | 1.465733449  | 0.5450745  | 7.17E-03 | 3.18E-02 | ENSMUSG00000039824 |
| Myl9     | 0.727193532  | 0.15296627 | 1.99E-06 | 3.71E-05 | ENSMUSG00000067818 |
| Mylk     | 1.202627066  | 0.20214955 | 2.69E-09 | 1.07E-07 | ENSMUSG00000022836 |
| Myo18a   | 0.4294078    | 0.16055845 | 7.48E-03 | 3.29E-02 | ENSMUSG00000000631 |
| Myo1d    | 0.711368188  | 0.12190403 | 5.36E-09 | 2.00E-07 | ENSMUSG00000035441 |
| Myo1e    | 0.621128414  | 0.15895453 | 9.32E-05 | 9.51E-04 | ENSMUSG00000032220 |
| Myo5a    | -0.954259543 | 0.23702603 | 5.67E-05 | 6.36E-04 | ENSMUSG00000034593 |
| Myo6     | -0.819970373 | 0.20706113 | 7.49E-05 | 7.99E-04 | ENSMUSG00000033577 |
| Myof     | -0.500121993 | 0.19706196 | 1.12E-02 | 4.48E-02 | ENSMUSG00000048612 |
| Mzt1     | -0.98923315  | 0.30589755 | 1.22E-03 | 7.80E-03 | ENSMUSG00000033186 |
| n-R5-8s1 | -1.811125142 | 0.59629424 | 2.39E-03 | 1.32E-02 | ENSMUSG00000065922 |
| N4bp2l1  | -1.010560045 | 0.2410467  | 2.76E-05 | 3.45E-04 | ENSMUSG00000041132 |
| N4bp2l2  | -0.766593638 | 0.19723432 | 1.02E-04 | 1.01E-03 | ENSMUSG00000029655 |
| Naa15    | -0.475342177 | 0.15108068 | 1.65E-03 | 9.89E-03 | ENSMUSG00000063273 |
| Naa16    | -0.869067848 | 0.28500261 | 2.29E-03 | 1.28E-02 | ENSMUSG00000022020 |
| Naa25    | -1.129270757 | 0.21677533 | 1.89E-07 | 4.63E-06 | ENSMUSG00000042719 |
| Naa30    | -0.71909007  | 0.23863511 | 2.58E-03 | 1.41E-02 | ENSMUSG00000036282 |
| Naa50    | -1.118275628 | 0.14550127 | 1.52E-14 | 1.52E-12 | ENSMUSG00000022698 |
| Naa60    | 0.392974402  | 0.15216483 | 9.81E-03 | 4.05E-02 | ENSMUSG00000005982 |
| Nab1     | -1.238718047 | 0.24167276 | 2.97E-07 | 6.83E-06 | ENSMUSG00000002881 |
| Nab2     | 0.672403004  | 0.17945918 | 1.79E-04 | 1.61E-03 | ENSMUSG00000025402 |
| Naca     | -0.65881557  | 0.1770575  | 1.99E-04 | 1.75E-03 | ENSMUSG00000061315 |
| Nacc2    | 0.967833056  | 0.17431204 | 2.82E-08 | 8.77E-07 | ENSMUSG00000026932 |

|          |              |            |          |          |                     |
|----------|--------------|------------|----------|----------|---------------------|
| Nae1     | -0.805624901 | 0.22896083 | 4.34E-04 | 3.34E-03 | ENSMUSG00000031878  |
| Nagk     | 0.922556563  | 0.14333108 | 1.22E-10 | 6.82E-09 | ENSMUSG00000034744  |
| Naglu    | 0.642998206  | 0.1276662  | 4.74E-07 | 1.04E-05 | ENSMUSG00000001751  |
| Nagpa    | 0.798868489  | 0.17714439 | 6.49E-06 | 1.01E-04 | ENSMUSG00000023143  |
| Nampt    | -0.786035706 | 0.15552276 | 4.32E-07 | 9.61E-06 | ENSMUSG00000020572  |
| Nap1l1   | -0.91471332  | 0.14987443 | 1.04E-09 | 4.59E-08 | ENSMUSG000000058799 |
| Napb     | -1.246801241 | 0.41977597 | 2.98E-03 | 1.58E-02 | ENSMUSG00000027438  |
| Nars     | -0.637946587 | 0.12195908 | 1.69E-07 | 4.18E-06 | ENSMUSG00000024587  |
| Nat8f1   | 1.791397319  | 0.388881   | 4.09E-06 | 6.83E-05 | ENSMUSG000000057103 |
| Nbl1     | 0.532449127  | 0.13028445 | 4.37E-05 | 5.13E-04 | ENSMUSG000000041120 |
| Nbr1     | -0.457719434 | 0.16966847 | 6.98E-03 | 3.12E-02 | ENSMUSG00000017119  |
| Ncam1    | 0.489001151  | 0.16848451 | 3.70E-03 | 1.88E-02 | ENSMUSG00000039542  |
| Ncbp2    | 0.501543064  | 0.18570242 | 6.92E-03 | 3.10E-02 | ENSMUSG00000022774  |
| Ncdn     | 0.655113475  | 0.21877424 | 2.75E-03 | 1.48E-02 | ENSMUSG00000028833  |
| Ncf1     | 1.683933559  | 0.329643   | 3.25E-07 | 7.45E-06 | ENSMUSG00000015950  |
| Nck2     | -0.714073661 | 0.20185827 | 4.04E-04 | 3.14E-03 | ENSMUSG00000066877  |
| Nckap1   | -0.735829597 | 0.17162814 | 1.81E-05 | 2.41E-04 | ENSMUSG00000027002  |
| Ncl      | -1.149352595 | 0.17104113 | 1.82E-11 | 1.23E-09 | ENSMUSG00000026234  |
| Ncln     | 0.47657207   | 0.16899394 | 4.80E-03 | 2.32E-02 | ENSMUSG00000020238  |
| Ncoa7    | -0.792311254 | 0.28581896 | 5.57E-03 | 2.61E-02 | ENSMUSG00000039697  |
| Ncor1    | -0.86419996  | 0.14713313 | 4.26E-09 | 1.63E-07 | ENSMUSG00000018501  |
| Ncor2    | 0.642528568  | 0.14936893 | 1.70E-05 | 2.29E-04 | ENSMUSG00000029478  |
| Ncstn    | 0.649713562  | 0.23674364 | 6.06E-03 | 2.78E-02 | ENSMUSG00000003458  |
| Ndel1    | -0.456369446 | 0.13981851 | 1.10E-03 | 7.14E-03 | ENSMUSG00000018736  |
| Ndn      | 0.779778005  | 0.17209303 | 5.87E-06 | 9.27E-05 | ENSMUSG00000033585  |
| Ndnf     | 3.854563605  | 1.01745967 | 1.52E-04 | 1.40E-03 | ENSMUSG00000049001  |
| Ndrg2    | 1.249687106  | 0.12458274 | 1.11E-23 | 3.58E-21 | ENSMUSG00000004558  |
| Ndrg3    | 0.64028398   | 0.15760691 | 4.85E-05 | 5.57E-04 | ENSMUSG00000027634  |
| Ndst1    | 0.489274355  | 0.15774692 | 1.92E-03 | 1.11E-02 | ENSMUSG00000054008  |
| Ndufa1   | 0.442312027  | 0.14371769 | 2.09E-03 | 1.18E-02 | ENSMUSG00000016427  |
| Ndufa13  | 0.242131825  | 0.09732195 | 1.28E-02 | 4.98E-02 | ENSMUSG00000036199  |
| Ndufa3   | 0.400926319  | 0.09618892 | 3.07E-05 | 3.79E-04 | ENSMUSG00000035674  |
| Ndufa4l2 | 1.934263135  | 0.10873028 | 8.52E-71 | 2.80E-67 | ENSMUSG00000040280  |
| Ndufaf4  | -0.502276292 | 0.17840236 | 4.87E-03 | 2.35E-02 | ENSMUSG00000028261  |
| Ndufb2   | 0.658120971  | 0.12301213 | 8.79E-08 | 2.36E-06 | ENSMUSG00000002416  |
| Ndufb7   | 0.45058168   | 0.13272914 | 6.87E-04 | 4.86E-03 | ENSMUSG00000033938  |
| Ndufc1   | 0.330603432  | 0.10061319 | 1.02E-03 | 6.69E-03 | ENSMUSG00000037152  |
| Ndufv3   | 0.787667812  | 0.12109011 | 7.78E-11 | 4.61E-09 | ENSMUSG00000024038  |
| Nedd1    | -1.000646627 | 0.33103255 | 2.50E-03 | 1.37E-02 | ENSMUSG00000019988  |
| Nedd4l   | -0.71917325  | 0.17149796 | 2.75E-05 | 3.44E-04 | ENSMUSG00000024589  |
| Nek7     | -0.742607152 | 0.22694997 | 1.07E-03 | 6.97E-03 | ENSMUSG00000026393  |
| Nemf     | -1.098398979 | 0.28595828 | 1.22E-04 | 1.18E-03 | ENSMUSG00000020982  |
| Nenf     | 0.468875045  | 0.12517674 | 1.80E-04 | 1.61E-03 | ENSMUSG00000037499  |

|          |              |            |          |          |                    |
|----------|--------------|------------|----------|----------|--------------------|
| Neo1     | 0.596213071  | 0.15127189 | 8.10E-05 | 8.49E-04 | ENSMUSG00000032340 |
| Neurl2   | 1.94821265   | 0.53361902 | 2.61E-04 | 2.20E-03 | ENSMUSG00000039873 |
| Nfam1    | 1.899489768  | 0.57808365 | 1.02E-03 | 6.69E-03 | ENSMUSG00000058099 |
| Nfatc4   | 0.7232916    | 0.14365764 | 4.78E-07 | 1.05E-05 | ENSMUSG00000023411 |
| Nfe2l2   | -0.899073974 | 0.14784347 | 1.19E-09 | 5.22E-08 | ENSMUSG00000015839 |
| Nfib     | -0.584442472 | 0.1924242  | 2.39E-03 | 1.32E-02 | ENSMUSG00000008575 |
| Nfix     | 0.639618269  | 0.13328019 | 1.59E-06 | 3.05E-05 | ENSMUSG00000001911 |
| Nfkbib   | -0.470872109 | 0.14533992 | 1.20E-03 | 7.68E-03 | ENSMUSG00000030595 |
| Nfkbie   | 1.20177609   | 0.43117363 | 5.32E-03 | 2.51E-02 | ENSMUSG00000023947 |
| Nfkbiz   | -0.806872785 | 0.22683638 | 3.75E-04 | 2.95E-03 | ENSMUSG00000035356 |
| Ngf      | -1.284907039 | 0.1910356  | 1.74E-11 | 1.18E-09 | ENSMUSG00000027859 |
| Nhej1    | 1.050586483  | 0.37296212 | 4.85E-03 | 2.34E-02 | ENSMUSG00000026162 |
| Nhp2     | -0.447137277 | 0.12039182 | 2.04E-04 | 1.79E-03 | ENSMUSG00000001056 |
| Nhs      | -1.336163488 | 0.37797787 | 4.08E-04 | 3.17E-03 | ENSMUSG00000059493 |
| Nhsl1    | 1.627871439  | 0.54303183 | 2.72E-03 | 1.47E-02 | ENSMUSG00000039835 |
| Nifk     | -0.45297239  | 0.16927726 | 7.45E-03 | 3.28E-02 | ENSMUSG00000026377 |
| Nipa2    | -0.662825677 | 0.22059543 | 2.66E-03 | 1.44E-02 | ENSMUSG00000030452 |
| Nipbl    | -1.006823299 | 0.27490291 | 2.50E-04 | 2.11E-03 | ENSMUSG00000022141 |
| Nipsnap2 | 0.435633792  | 0.1401653  | 1.88E-03 | 1.09E-02 | ENSMUSG00000029432 |
| Nisch    | 0.355488584  | 0.11906235 | 2.83E-03 | 1.51E-02 | ENSMUSG00000021910 |
| Nkapd1   | -1.266979677 | 0.30766721 | 3.82E-05 | 4.55E-04 | ENSMUSG00000059820 |
| Nkrf     | -1.460197074 | 0.48666785 | 2.70E-03 | 1.46E-02 | ENSMUSG00000044149 |
| Nktr     | -0.94464611  | 0.23859574 | 7.52E-05 | 8.00E-04 | ENSMUSG00000032525 |
| Nlk      | -0.94530169  | 0.36263465 | 9.14E-03 | 3.84E-02 | ENSMUSG00000017376 |
| Nlrx1    | 0.927199516  | 0.29282719 | 1.54E-03 | 9.33E-03 | ENSMUSG00000032109 |
| Nmb      | 1.113014532  | 0.29245879 | 1.41E-04 | 1.33E-03 | ENSMUSG00000025723 |
| Nmd3     | -1.011606443 | 0.2437535  | 3.32E-05 | 4.06E-04 | ENSMUSG00000027787 |
| Nme4     | 1.214005187  | 0.16457287 | 1.62E-13 | 1.48E-11 | ENSMUSG00000024177 |
| Nme5     | 1.295078499  | 0.43543491 | 2.94E-03 | 1.56E-02 | ENSMUSG00000035984 |
| Nmrk1    | 0.559691207  | 0.19380049 | 3.88E-03 | 1.95E-02 | ENSMUSG00000037847 |
| Nmt2     | -0.974151979 | 0.22289821 | 1.24E-05 | 1.74E-04 | ENSMUSG00000026643 |
| Noc2l    | 1.059381315  | 0.34673877 | 2.25E-03 | 1.26E-02 | ENSMUSG00000095440 |
| Nol7     | -0.52241657  | 0.19454885 | 7.25E-03 | 3.21E-02 | ENSMUSG00000063200 |
| Nol8     | -1.287531967 | 0.31452055 | 4.25E-05 | 5.01E-04 | ENSMUSG00000021392 |
| Nolc1    | -0.605687626 | 0.18026495 | 7.79E-04 | 5.43E-03 | ENSMUSG00000015176 |
| Nop14    | -1.303243936 | 0.28135331 | 3.62E-06 | 6.17E-05 | ENSMUSG00000036693 |
| Nop16    | -0.376225954 | 0.12248217 | 2.13E-03 | 1.20E-02 | ENSMUSG00000025869 |
| Nop58    | -1.294291446 | 0.2170188  | 2.46E-09 | 1.00E-07 | ENSMUSG00000026020 |
| Notch4   | 2.035892046  | 0.64339544 | 1.55E-03 | 9.37E-03 | ENSMUSG00000015468 |
| Notum    | 0.986092195  | 0.28831382 | 6.26E-04 | 4.50E-03 | ENSMUSG00000042988 |
| Npdc1    | 0.337864676  | 0.12211237 | 5.66E-03 | 2.64E-02 | ENSMUSG00000015094 |
| Npepl1   | 0.506619365  | 0.18565358 | 6.36E-03 | 2.89E-02 | ENSMUSG00000039263 |
| Npm1     | -1.136944425 | 0.15962679 | 1.06E-12 | 8.51E-11 | ENSMUSG00000057113 |



|          |              |            |          |          |                    |
|----------|--------------|------------|----------|----------|--------------------|
| Npr2     | 0.788984597  | 0.14102656 | 2.21E-08 | 7.07E-07 | ENSMUSG00000028469 |
| Npy      | -1.033795995 | 0.28466594 | 2.82E-04 | 2.33E-03 | ENSMUSG00000029819 |
| Nr1d1    | -1.093104758 | 0.17343363 | 2.92E-10 | 1.52E-08 | ENSMUSG00000020889 |
| Nr1d2    | -1.122009588 | 0.18615167 | 1.67E-09 | 7.03E-08 | ENSMUSG00000021775 |
| Nr1h3    | 1.206894119  | 0.36449246 | 9.29E-04 | 6.27E-03 | ENSMUSG00000002108 |
| Nr2c2    | -0.683914742 | 0.19767262 | 5.41E-04 | 4.00E-03 | ENSMUSG00000005893 |
| Nr2c2ap  | -0.617408652 | 0.15351011 | 5.77E-05 | 6.44E-04 | ENSMUSG00000071078 |
| Nr2f6    | 0.495568801  | 0.17365286 | 4.32E-03 | 2.13E-02 | ENSMUSG00000002393 |
| Nradd    | 0.496278172  | 0.1668777  | 2.94E-03 | 1.56E-02 | ENSMUSG00000032491 |
| Nrbp1    | 0.586163574  | 0.19903719 | 3.23E-03 | 1.68E-02 | ENSMUSG00000029148 |
| Nrbp2    | 0.756013423  | 0.24285898 | 1.85E-03 | 1.08E-02 | ENSMUSG00000075590 |
| Nrd1     | -0.674268217 | 0.1721278  | 8.96E-05 | 9.19E-04 | ENSMUSG00000053510 |
| Nrgn     | 2.060237796  | 0.26650287 | 1.07E-14 | 1.11E-12 | ENSMUSG00000053310 |
| Nrip2    | 1.055391129  | 0.20681038 | 3.34E-07 | 7.65E-06 | ENSMUSG00000001520 |
| Nrk      | -1.605939345 | 0.53269228 | 2.57E-03 | 1.41E-02 | ENSMUSG00000052854 |
| Nrros    | 1.223940647  | 0.32231996 | 1.46E-04 | 1.36E-03 | ENSMUSG00000052384 |
| Nsd3     | -0.603175171 | 0.16177217 | 1.93E-04 | 1.71E-03 | ENSMUSG00000054823 |
| Nsdhl    | 0.685603423  | 0.21621254 | 1.52E-03 | 9.22E-03 | ENSMUSG00000031349 |
| Nsmce3   | 0.588979799  | 0.21379409 | 5.87E-03 | 2.72E-02 | ENSMUSG00000070520 |
| Nsmf     | 0.459372665  | 0.18171566 | 1.15E-02 | 4.57E-02 | ENSMUSG00000006476 |
| Nsrp1    | -1.182025091 | 0.28530778 | 3.43E-05 | 4.15E-04 | ENSMUSG00000037958 |
| Nsun2    | -0.948712593 | 0.14223291 | 2.56E-11 | 1.66E-09 | ENSMUSG00000021595 |
| Nt5e     | -1.416497249 | 0.21691136 | 6.56E-11 | 3.95E-09 | ENSMUSG00000032420 |
| Ntmt1    | -0.520856363 | 0.15227565 | 6.25E-04 | 4.50E-03 | ENSMUSG00000026857 |
| Ntpcr    | 0.479881746  | 0.16649633 | 3.95E-03 | 1.98E-02 | ENSMUSG00000031851 |
| Nuak1    | 0.868703695  | 0.13312913 | 6.79E-11 | 4.06E-09 | ENSMUSG00000020032 |
| Nucb1    | 0.469828841  | 0.11941807 | 8.34E-05 | 8.67E-04 | ENSMUSG00000030824 |
| Nucks1   | -0.501912035 | 0.17819248 | 4.85E-03 | 2.34E-02 | ENSMUSG00000026434 |
| Nudcd1   | -1.114188801 | 0.33613833 | 9.18E-04 | 6.20E-03 | ENSMUSG00000038736 |
| Nudcd2   | -0.766731906 | 0.1466158  | 1.70E-07 | 4.21E-06 | ENSMUSG00000020328 |
| Nudt1    | 0.609117361  | 0.21997415 | 5.62E-03 | 2.63E-02 | ENSMUSG00000036639 |
| Nudt16l1 | 0.634851843  | 0.18465507 | 5.86E-04 | 4.28E-03 | ENSMUSG00000022516 |
| Nudt18   | 0.687993867  | 0.23050392 | 2.84E-03 | 1.52E-02 | ENSMUSG00000045211 |
| Nufip1   | -0.646214607 | 0.24993584 | 9.72E-03 | 4.03E-02 | ENSMUSG00000022009 |
| Nufip2   | -0.836054538 | 0.15089394 | 3.01E-08 | 9.33E-07 | ENSMUSG00000037857 |
| Nup62    | -0.745898182 | 0.29226649 | 1.07E-02 | 4.35E-02 | ENSMUSG00000108621 |
| Nupr1    | -0.333745279 | 0.11402873 | 3.42E-03 | 1.76E-02 | ENSMUSG00000030717 |
| Nus1     | -0.963590509 | 0.12032869 | 1.17E-15 | 1.40E-13 | ENSMUSG00000023068 |
| Nxt1     | -0.452857019 | 0.15360432 | 3.20E-03 | 1.67E-02 | ENSMUSG00000036992 |
| Nynrin   | 1.134941644  | 0.17480718 | 8.44E-11 | 4.94E-09 | ENSMUSG00000075592 |
| Oaf      | 0.50371196   | 0.15875866 | 1.51E-03 | 9.18E-03 | ENSMUSG00000032014 |
| Ocel1    | 0.822510749  | 0.2632219  | 1.78E-03 | 1.05E-02 | ENSMUSG00000002396 |
| Odf2l    | -1.905207162 | 0.75993584 | 1.22E-02 | 4.79E-02 | ENSMUSG00000028256 |

|          |              |            |          |          |                    |
|----------|--------------|------------|----------|----------|--------------------|
| Odr4     | -1.008044449 | 0.27326383 | 2.25E-04 | 1.94E-03 | ENSMUSG0000006010  |
| Oga      | -0.837773573 | 0.20203908 | 3.37E-05 | 4.11E-04 | ENSMUSG00000025220 |
| Ogdh     | 0.460129446  | 0.13663207 | 7.58E-04 | 5.31E-03 | ENSMUSG00000020456 |
| Ola1     | -1.025315476 | 0.18567083 | 3.35E-08 | 1.02E-06 | ENSMUSG00000027108 |
| Olflml2a | 1.585393149  | 0.40183933 | 7.97E-05 | 8.37E-04 | ENSMUSG00000046618 |
| Olflml2b | 1.865613434  | 0.14393218 | 2.02E-38 | 2.41E-35 | ENSMUSG00000038463 |
| Olflml3  | 2.041730017  | 0.11136252 | 4.42E-75 | 1.94E-71 | ENSMUSG00000027848 |
| Omd      | 1.179664337  | 0.21586079 | 4.63E-08 | 1.34E-06 | ENSMUSG00000048368 |
| Onecut2  | -2.657556517 | 0.83954388 | 1.55E-03 | 9.35E-03 | ENSMUSG00000045991 |
| Oplah    | 0.708608963  | 0.17194112 | 3.77E-05 | 4.50E-04 | ENSMUSG00000022562 |
| Orai1    | 0.681257544  | 0.2699056  | 1.16E-02 | 4.61E-02 | ENSMUSG00000049686 |
| Orai3    | 0.506018435  | 0.15654482 | 1.23E-03 | 7.83E-03 | ENSMUSG00000043964 |
| Orc4     | -1.33134589  | 0.20635083 | 1.10E-10 | 6.25E-09 | ENSMUSG00000026761 |
| Orc6     | -0.709806325 | 0.27882356 | 1.09E-02 | 4.41E-02 | ENSMUSG00000031697 |
| Os9      | 0.496675195  | 0.12009747 | 3.54E-05 | 4.26E-04 | ENSMUSG00000040462 |
| Osbpl2   | -0.494555123 | 0.16464471 | 2.67E-03 | 1.45E-02 | ENSMUSG00000039050 |
| Osbpl7   | 1.018320825  | 0.3245796  | 1.70E-03 | 1.01E-02 | ENSMUSG00000038534 |
| Osbpl8   | -0.836326353 | 0.30367435 | 5.89E-03 | 2.72E-02 | ENSMUSG00000020189 |
| Osbpl9   | -0.693060694 | 0.18431815 | 1.70E-04 | 1.54E-03 | ENSMUSG00000028559 |
| Osmr     | -1.018341803 | 0.24355653 | 2.90E-05 | 3.60E-04 | ENSMUSG00000022146 |
| Otud4    | -0.868119322 | 0.22140915 | 8.82E-05 | 9.07E-04 | ENSMUSG00000036990 |
| Otud6b   | -0.658226757 | 0.25277197 | 9.21E-03 | 3.86E-02 | ENSMUSG00000040550 |
| Ovgp1    | -1.049911974 | 0.26876008 | 9.36E-05 | 9.54E-04 | ENSMUSG00000074340 |
| P2rx2    | 2.316714485  | 0.67331483 | 5.80E-04 | 4.24E-03 | ENSMUSG00000029503 |
| P2rx5    | 1.835303172  | 0.53003886 | 5.35E-04 | 3.97E-03 | ENSMUSG00000005950 |
| P2rx6    | 1.999018176  | 0.76568588 | 9.03E-03 | 3.80E-02 | ENSMUSG00000022758 |
| P3h4     | 0.372743479  | 0.11012886 | 7.13E-04 | 5.03E-03 | ENSMUSG00000006931 |
| P4ha2    | 0.725895772  | 0.11790276 | 7.43E-10 | 3.48E-08 | ENSMUSG00000018906 |
| P4ha3    | 0.678150175  | 0.19965497 | 6.82E-04 | 4.83E-03 | ENSMUSG00000051048 |
| P4hb     | 0.371423812  | 0.10888774 | 6.47E-04 | 4.64E-03 | ENSMUSG00000025130 |
| Pa2g4    | -0.391354681 | 0.12990314 | 2.59E-03 | 1.41E-02 | ENSMUSG00000025364 |
| Pabpc1   | -0.755844364 | 0.17433347 | 1.45E-05 | 2.01E-04 | ENSMUSG00000022283 |
| Pabpc4   | -0.28163782  | 0.10218062 | 5.85E-03 | 2.71E-02 | ENSMUSG00000011257 |
| Pafah1b1 | -0.473527911 | 0.12068456 | 8.72E-05 | 8.98E-04 | ENSMUSG00000020745 |
| Pafah1b3 | 0.72693915   | 0.17255994 | 2.52E-05 | 3.20E-04 | ENSMUSG00000005447 |
| Pafah2   | 1.030663774  | 0.179537   | 9.43E-09 | 3.36E-07 | ENSMUSG00000037366 |
| Paics    | -0.378549957 | 0.14208704 | 7.72E-03 | 3.37E-02 | ENSMUSG00000029247 |
| Paip2    | -0.502056789 | 0.15230897 | 9.80E-04 | 6.51E-03 | ENSMUSG00000037058 |
| Pak1ip1  | -0.445296182 | 0.12928869 | 5.73E-04 | 4.20E-03 | ENSMUSG00000038683 |
| Pak2     | -0.601535744 | 0.18598348 | 1.22E-03 | 7.79E-03 | ENSMUSG00000022781 |
| Panx3    | 2.946413505  | 0.20464351 | 5.34E-47 | 1.17E-43 | ENSMUSG00000011118 |
| Papola   | -0.717020079 | 0.13912159 | 2.55E-07 | 6.00E-06 | ENSMUSG00000021111 |
| Papss2   | -0.816571774 | 0.22217216 | 2.37E-04 | 2.03E-03 | ENSMUSG00000024899 |

|         |              |            |          |          |                    |
|---------|--------------|------------|----------|----------|--------------------|
| Paqr7   | 0.716890228  | 0.24066395 | 2.89E-03 | 1.54E-02 | ENSMUSG00000037348 |
| Parp3   | 0.530933778  | 0.18355306 | 3.82E-03 | 1.92E-02 | ENSMUSG00000023249 |
| Parva   | 0.331294527  | 0.11951803 | 5.57E-03 | 2.61E-02 | ENSMUSG00000030770 |
| Paxbp1  | -1.162574637 | 0.27603296 | 2.53E-05 | 3.21E-04 | ENSMUSG00000022974 |
| Pbrm1   | -0.703183742 | 0.22811272 | 2.05E-03 | 1.17E-02 | ENSMUSG00000042323 |
| Pbx1    | -0.812338825 | 0.18927808 | 1.77E-05 | 2.38E-04 | ENSMUSG00000052534 |
| Pbxip1  | 0.94770475   | 0.12324065 | 1.47E-14 | 1.48E-12 | ENSMUSG00000042613 |
| Pcbd2   | 0.399165169  | 0.14634293 | 6.38E-03 | 2.90E-02 | ENSMUSG00000021496 |
| Pcbp4   | 0.679876767  | 0.11526421 | 3.67E-09 | 1.42E-07 | ENSMUSG00000023495 |
| Pccb    | 0.98804835   | 0.15677877 | 2.93E-10 | 1.52E-08 | ENSMUSG00000032527 |
| Pcf11   | -1.344431182 | 0.23138263 | 6.23E-09 | 2.28E-07 | ENSMUSG00000041328 |
| Pcgf6   | -1.322263967 | 0.45722784 | 3.83E-03 | 1.93E-02 | ENSMUSG00000025050 |
| Pck2    | -0.329672448 | 0.12025064 | 6.12E-03 | 2.80E-02 | ENSMUSG00000040618 |
| Pcnp    | -0.872445061 | 0.21839575 | 6.48E-05 | 7.11E-04 | ENSMUSG00000071533 |
| Pcnx3   | 0.851323593  | 0.19426005 | 1.17E-05 | 1.66E-04 | ENSMUSG00000054874 |
| Pcolce  | 1.098236659  | 0.11476575 | 1.08E-21 | 2.40E-19 | ENSMUSG00000029718 |
| Pcolce2 | 0.691374367  | 0.15814751 | 1.23E-05 | 1.74E-04 | ENSMUSG00000015354 |
| Pcp4l1  | 1.688645814  | 0.42793515 | 7.95E-05 | 8.35E-04 | ENSMUSG00000038370 |
| Pcsk6   | 1.245433666  | 0.21064631 | 3.37E-09 | 1.32E-07 | ENSMUSG00000030513 |
| Pcx     | 0.98567915   | 0.20164524 | 1.02E-06 | 2.06E-05 | ENSMUSG00000024892 |
| Pcyox1  | 0.451559495  | 0.15208184 | 2.99E-03 | 1.58E-02 | ENSMUSG00000029998 |
| Pcyox1l | 1.409986179  | 0.37424652 | 1.65E-04 | 1.50E-03 | ENSMUSG00000024579 |
| Pdap1   | -0.407416386 | 0.12425899 | 1.04E-03 | 6.83E-03 | ENSMUSG00000029623 |
| Pdcd10  | -0.629574578 | 0.24420856 | 9.94E-03 | 4.10E-02 | ENSMUSG00000027835 |
| Pdcd2l  | -0.574079777 | 0.17106279 | 7.91E-04 | 5.49E-03 | ENSMUSG00000002635 |
| Pdcd5   | -0.562992411 | 0.17006242 | 9.31E-04 | 6.27E-03 | ENSMUSG00000030417 |
| Pde4b   | -0.695116442 | 0.19214886 | 2.97E-04 | 2.44E-03 | ENSMUSG00000028525 |
| Pdgfrb  | 1.444042063  | 0.15268349 | 3.15E-21 | 6.68E-19 | ENSMUSG00000024620 |
| Pdgfrl  | 0.732850668  | 0.25729637 | 4.40E-03 | 2.16E-02 | ENSMUSG00000031595 |
| Pdha1   | -0.486904595 | 0.13117613 | 2.06E-04 | 1.80E-03 | ENSMUSG00000031299 |
| Pdia6   | 0.439158082  | 0.10308856 | 2.04E-05 | 2.69E-04 | ENSMUSG00000020571 |
| Pdik1l  | -1.063580136 | 0.3914618  | 6.59E-03 | 2.97E-02 | ENSMUSG00000050890 |
| Pdk1    | 1.075141087  | 0.19730078 | 5.06E-08 | 1.46E-06 | ENSMUSG00000006494 |
| Pdk2    | 0.617581151  | 0.20838051 | 3.04E-03 | 1.60E-02 | ENSMUSG00000038967 |
| Pdk4    | -1.092203712 | 0.30672748 | 3.70E-04 | 2.92E-03 | ENSMUSG00000019577 |
| Pdlim2  | 0.793030019  | 0.11422848 | 3.85E-12 | 2.85E-10 | ENSMUSG00000022090 |
| Pdlim7  | 0.331698469  | 0.11846464 | 5.11E-03 | 2.43E-02 | ENSMUSG00000021493 |
| Pdpn    | -0.38155909  | 0.12742125 | 2.75E-03 | 1.48E-02 | ENSMUSG00000028583 |
| Pdxdc1  | -0.404291784 | 0.16204846 | 1.26E-02 | 4.91E-02 | ENSMUSG00000022680 |
| Pdxk    | 0.602016229  | 0.17280558 | 4.94E-04 | 3.71E-03 | ENSMUSG00000032788 |
| Pdzd8   | -0.975717628 | 0.28518766 | 6.23E-04 | 4.49E-03 | ENSMUSG00000074746 |
| Pear1   | 0.80881652   | 0.32197847 | 1.20E-02 | 4.74E-02 | ENSMUSG00000028073 |
| Pecam1  | -0.657121792 | 0.21349622 | 2.08E-03 | 1.18E-02 | ENSMUSG00000020717 |

|         |              |            |          |          |                    |
|---------|--------------|------------|----------|----------|--------------------|
| Peli1   | -0.632785692 | 0.244144   | 9.55E-03 | 3.97E-02 | ENSMUSG00000020134 |
| Pepd    | 0.518040325  | 0.2001582  | 9.65E-03 | 4.01E-02 | ENSMUSG00000063931 |
| Pet100  | 1.025373998  | 0.12537776 | 2.88E-16 | 3.61E-14 | ENSMUSG00000087687 |
| Pex11g  | 1.518308864  | 0.40385973 | 1.70E-04 | 1.54E-03 | ENSMUSG00000069633 |
| Pex12   | 1.016181729  | 0.29197079 | 5.01E-04 | 3.75E-03 | ENSMUSG00000018733 |
| Pex19   | 0.441748157  | 0.13732326 | 1.30E-03 | 8.15E-03 | ENSMUSG00000003464 |
| Pex6    | 0.591357254  | 0.21103722 | 5.08E-03 | 2.42E-02 | ENSMUSG00000002763 |
| Pfdn4   | -0.435689274 | 0.16889559 | 9.89E-03 | 4.08E-02 | ENSMUSG00000052033 |
| Pfdn6   | -0.407343085 | 0.13812439 | 3.19E-03 | 1.67E-02 | ENSMUSG00000024309 |
| Pfkl    | 1.332971195  | 0.12682048 | 7.71E-26 | 2.99E-23 | ENSMUSG00000020277 |
| Pfkm    | 0.550155247  | 0.21915651 | 1.21E-02 | 4.76E-02 | ENSMUSG00000033065 |
| Pfn1    | 0.921417398  | 0.1658123  | 2.74E-08 | 8.58E-07 | ENSMUSG00000018293 |
| Pgd     | 0.376845384  | 0.13667882 | 5.83E-03 | 2.71E-02 | ENSMUSG00000028961 |
| Pgghg   | 0.867149355  | 0.3133147  | 5.65E-03 | 2.64E-02 | ENSMUSG00000062031 |
| Pgls    | 0.375438636  | 0.1174154  | 1.39E-03 | 8.56E-03 | ENSMUSG00000031807 |
| Pgm5    | 1.79852862   | 0.40131451 | 7.41E-06 | 1.13E-04 | ENSMUSG00000041731 |
| Phc2    | 0.559637215  | 0.14017304 | 6.54E-05 | 7.16E-04 | ENSMUSG00000028796 |
| Phc3    | -0.912500856 | 0.33760199 | 6.87E-03 | 3.08E-02 | ENSMUSG00000037652 |
| Phf10   | -0.477225546 | 0.13441188 | 3.85E-04 | 3.02E-03 | ENSMUSG00000023883 |
| Phf14   | -0.738188018 | 0.27330481 | 6.91E-03 | 3.10E-02 | ENSMUSG00000029629 |
| Phf20   | -0.682290016 | 0.23902062 | 4.31E-03 | 2.13E-02 | ENSMUSG00000038116 |
| Phf23   | 0.391638071  | 0.12295985 | 1.45E-03 | 8.88E-03 | ENSMUSG00000018572 |
| Phf3    | -1.123478461 | 0.25395483 | 9.69E-06 | 1.41E-04 | ENSMUSG00000048874 |
| Phf6    | -1.021992896 | 0.34349472 | 2.93E-03 | 1.56E-02 | ENSMUSG00000025626 |
| Phip    | -1.054221902 | 0.23604558 | 7.96E-06 | 1.20E-04 | ENSMUSG00000032253 |
| Phldb1  | 0.407537201  | 0.16108468 | 1.14E-02 | 4.55E-02 | ENSMUSG00000048537 |
| Phldb2  | -1.091083097 | 0.27646319 | 7.93E-05 | 8.34E-04 | ENSMUSG00000033149 |
| Phpt1   | 0.436800515  | 0.13720724 | 1.46E-03 | 8.89E-03 | ENSMUSG00000036504 |
| Phyhd1  | 2.330841253  | 0.81057385 | 4.03E-03 | 2.01E-02 | ENSMUSG00000079484 |
| Pias3   | 0.504444748  | 0.16771941 | 2.63E-03 | 1.43E-02 | ENSMUSG00000028101 |
| Picalm  | -0.647001392 | 0.1430674  | 6.12E-06 | 9.60E-05 | ENSMUSG00000039361 |
| Pid1    | 0.900943291  | 0.19511794 | 3.89E-06 | 6.53E-05 | ENSMUSG00000045658 |
| Pidd1   | 1.918141945  | 0.60242506 | 1.45E-03 | 8.89E-03 | ENSMUSG00000025507 |
| Piezo1  | 0.775803215  | 0.14993627 | 2.29E-07 | 5.47E-06 | ENSMUSG00000014444 |
| Pigp    | 0.54300201   | 0.19028816 | 4.32E-03 | 2.13E-02 | ENSMUSG00000022940 |
| Pigq    | 0.646707051  | 0.16728537 | 1.11E-04 | 1.08E-03 | ENSMUSG00000025728 |
| Pigs    | 0.671365452  | 0.21959824 | 2.23E-03 | 1.25E-02 | ENSMUSG00000041958 |
| Pigyl   | 0.625132387  | 0.14696895 | 2.10E-05 | 2.75E-04 | ENSMUSG00000010607 |
| Pih1d1  | 0.731293383  | 0.16614069 | 1.07E-05 | 1.55E-04 | ENSMUSG00000003423 |
| Pik3c2a | -0.848576674 | 0.24931894 | 6.65E-04 | 4.73E-03 | ENSMUSG00000030660 |
| Pik3ca  | -0.956962262 | 0.23928815 | 6.36E-05 | 7.02E-04 | ENSMUSG00000027665 |
| Pik3cb  | -1.303940052 | 0.5023071  | 9.43E-03 | 3.93E-02 | ENSMUSG00000032462 |
| Pik3ip1 | 0.721292211  | 0.19369402 | 1.96E-04 | 1.74E-03 | ENSMUSG00000034614 |

|         |              |            |          |          |                    |
|---------|--------------|------------|----------|----------|--------------------|
| Pik3r2  | 0.372945623  | 0.13599524 | 6.10E-03 | 2.80E-02 | ENSMUSG00000031834 |
| Pim1    | -1.291464523 | 0.182321   | 1.41E-12 | 1.08E-10 | ENSMUSG00000024014 |
| Pim3    | -0.457005821 | 0.14834731 | 2.07E-03 | 1.17E-02 | ENSMUSG00000035828 |
| Pink1   | 0.549365495  | 0.1156144  | 2.02E-06 | 3.75E-05 | ENSMUSG00000028756 |
| Pirb    | 1.717284183  | 0.44754186 | 1.24E-04 | 1.19E-03 | ENSMUSG00000058818 |
| Pitpna  | 0.34740325   | 0.11365092 | 2.24E-03 | 1.25E-02 | ENSMUSG00000017781 |
| Pitpnb  | -0.458808892 | 0.16476724 | 5.36E-03 | 2.53E-02 | ENSMUSG00000050017 |
| Pja2    | -0.563462501 | 0.18550294 | 2.39E-03 | 1.32E-02 | ENSMUSG00000024083 |
| Pkd1    | 0.664922997  | 0.15062376 | 1.01E-05 | 1.46E-04 | ENSMUSG00000032855 |
| Pkdcc   | 0.908577592  | 0.15989305 | 1.33E-08 | 4.57E-07 | ENSMUSG00000024247 |
| Pkm     | 0.785526939  | 0.11965241 | 5.20E-11 | 3.24E-09 | ENSMUSG00000032294 |
| Pkn2    | -0.896915575 | 0.26570526 | 7.37E-04 | 5.18E-03 | ENSMUSG00000004591 |
| Pla2g15 | 0.541464669  | 0.14776119 | 2.48E-04 | 2.10E-03 | ENSMUSG00000031903 |
| Pla2g4a | -1.553815333 | 0.29623862 | 1.56E-07 | 3.91E-06 | ENSMUSG00000056220 |
| Pla2g5  | 2.35853449   | 0.51795598 | 5.28E-06 | 8.44E-05 | ENSMUSG00000041193 |
| Pla2g7  | 0.85495334   | 0.22190951 | 1.17E-04 | 1.14E-03 | ENSMUSG00000023913 |
| Plaa    | -1.001417433 | 0.17835332 | 1.97E-08 | 6.44E-07 | ENSMUSG00000028577 |
| Plagl1  | -0.515605733 | 0.13629122 | 1.55E-04 | 1.43E-03 | ENSMUSG00000019817 |
| Plau    | 1.36752205   | 0.25938381 | 1.35E-07 | 3.44E-06 | ENSMUSG00000021822 |
| Plaur   | 0.439669461  | 0.15745082 | 5.23E-03 | 2.48E-02 | ENSMUSG00000046223 |
| Plbd2   | 0.710632273  | 0.13482762 | 1.36E-07 | 3.46E-06 | ENSMUSG00000029598 |
| Plcb3   | 0.741643112  | 0.29759547 | 1.27E-02 | 4.94E-02 | ENSMUSG00000024960 |
| Plcd1   | 0.879312002  | 0.1477005  | 2.63E-09 | 1.05E-07 | ENSMUSG00000010660 |
| Plcx2   | -3.887566417 | 1.00060642 | 1.02E-04 | 1.02E-03 | ENSMUSG00000087141 |
| Plid3   | 0.519674384  | 0.13922519 | 1.90E-04 | 1.69E-03 | ENSMUSG00000003363 |
| Plec    | 0.813364005  | 0.15259279 | 9.81E-08 | 2.59E-06 | ENSMUSG00000022565 |
| Plekha1 | -0.592708122 | 0.21568597 | 6.00E-03 | 2.76E-02 | ENSMUSG00000040268 |
| Plekha2 | -0.385280717 | 0.13366546 | 3.95E-03 | 1.98E-02 | ENSMUSG00000026123 |
| Plekha4 | 2.571990385  | 0.39206432 | 5.38E-11 | 3.34E-09 | ENSMUSG00000014782 |
| Plekha5 | 1.040117872  | 0.1722816  | 1.57E-09 | 6.63E-08 | ENSMUSG00000039713 |
| Plekha2 | 1.35476971   | 0.3786657  | 3.47E-04 | 2.77E-03 | ENSMUSG00000040852 |
| Plekha3 | 0.806508913  | 0.21497418 | 1.76E-04 | 1.58E-03 | ENSMUSG00000035172 |
| Plin1   | 1.922120176  | 0.52284197 | 2.37E-04 | 2.03E-03 | ENSMUSG00000030546 |
| Plin2   | -0.93147697  | 0.13017353 | 8.33E-13 | 6.81E-11 | ENSMUSG00000028494 |
| Plin4   | 1.269388493  | 0.36408599 | 4.89E-04 | 3.68E-03 | ENSMUSG00000002831 |
| Plk1    | 1.358443     | 0.3103707  | 1.20E-05 | 1.70E-04 | ENSMUSG00000030867 |
| Plk3    | -0.647050561 | 0.24631314 | 8.62E-03 | 3.66E-02 | ENSMUSG00000028680 |
| Plod1   | 0.999787586  | 0.10178041 | 8.96E-23 | 2.51E-20 | ENSMUSG00000019055 |
| Plpp1   | 0.820205046  | 0.11459099 | 8.21E-13 | 6.75E-11 | ENSMUSG00000021759 |
| Plpp6   | 1.05911356   | 0.27961645 | 1.52E-04 | 1.41E-03 | ENSMUSG00000040105 |
| Plpp7   | 1.173557106  | 0.29660899 | 7.60E-05 | 8.05E-04 | ENSMUSG00000051373 |
| Plrg1   | -0.366606753 | 0.14529055 | 1.16E-02 | 4.62E-02 | ENSMUSG00000027998 |
| Pls3    | -0.678978508 | 0.21781056 | 1.83E-03 | 1.07E-02 | ENSMUSG00000016382 |

|          |              |            |          |          |                    |
|----------|--------------|------------|----------|----------|--------------------|
| Pltp     | 1.138565408  | 0.15348058 | 1.19E-13 | 1.09E-11 | ENSMUSG00000017754 |
| Plxna2   | 1.044415627  | 0.4141237  | 1.17E-02 | 4.63E-02 | ENSMUSG00000026640 |
| Plxnb2   | 0.667021771  | 0.1296514  | 2.68E-07 | 6.25E-06 | ENSMUSG00000036606 |
| Plxnd1   | 1.034306348  | 0.27720132 | 1.91E-04 | 1.69E-03 | ENSMUSG00000030123 |
| Pmepa1   | 0.810294832  | 0.12891026 | 3.26E-10 | 1.66E-08 | ENSMUSG00000038400 |
| Pmp22    | 0.635846764  | 0.11410334 | 2.51E-08 | 7.96E-07 | ENSMUSG00000018217 |
| Pnkp     | 0.432401429  | 0.17105392 | 1.15E-02 | 4.57E-02 | ENSMUSG00000002963 |
| Pnn      | -1.032871548 | 0.24884839 | 3.32E-05 | 4.06E-04 | ENSMUSG00000020994 |
| Pno1     | -0.598895646 | 0.15290034 | 8.97E-05 | 9.19E-04 | ENSMUSG00000020116 |
| Pnpla2   | -0.499355966 | 0.13383904 | 1.91E-04 | 1.70E-03 | ENSMUSG00000025509 |
| Pnpla8   | -0.907426782 | 0.26290879 | 5.58E-04 | 4.10E-03 | ENSMUSG00000036257 |
| Podnl1   | 1.896748943  | 0.17883562 | 2.79E-26 | 1.15E-23 | ENSMUSG00000012889 |
| Podxl2   | 1.184668149  | 0.43094419 | 5.98E-03 | 2.75E-02 | ENSMUSG00000033152 |
| Pofut1   | 0.707036372  | 0.24777389 | 4.32E-03 | 2.13E-02 | ENSMUSG00000046020 |
| Pogk     | -0.938482575 | 0.25969237 | 3.02E-04 | 2.47E-03 | ENSMUSG00000040596 |
| Poglut1  | 0.554181334  | 0.17629834 | 1.67E-03 | 9.97E-03 | ENSMUSG00000034064 |
| Polb     | -0.478716922 | 0.17023416 | 4.92E-03 | 2.37E-02 | ENSMUSG00000031536 |
| Pole3    | -0.430874922 | 0.14815373 | 3.63E-03 | 1.85E-02 | ENSMUSG00000028394 |
| Polm     | 0.963357742  | 0.36111279 | 7.64E-03 | 3.34E-02 | ENSMUSG00000020474 |
| Polr1c   | -0.537744191 | 0.15486913 | 5.16E-04 | 3.85E-03 | ENSMUSG00000067148 |
| Polr1d   | -0.35344716  | 0.11866963 | 2.90E-03 | 1.54E-02 | ENSMUSG00000029642 |
| Polr2a   | 0.639406081  | 0.18230497 | 4.53E-04 | 3.46E-03 | ENSMUSG00000005198 |
| Polr2c   | -0.371465363 | 0.1277036  | 3.63E-03 | 1.85E-02 | ENSMUSG00000031783 |
| Pomt1    | 0.864967841  | 0.28682939 | 2.56E-03 | 1.40E-02 | ENSMUSG00000039254 |
| Postn    | -0.569710421 | 0.17727739 | 1.31E-03 | 8.21E-03 | ENSMUSG00000027750 |
| Ppat     | -0.858130914 | 0.30401728 | 4.76E-03 | 2.30E-02 | ENSMUSG00000029246 |
| Ppid     | -0.703123627 | 0.18351909 | 1.27E-04 | 1.22E-03 | ENSMUSG00000027804 |
| Ppil4    | -0.632728875 | 0.23093602 | 6.15E-03 | 2.81E-02 | ENSMUSG00000015757 |
| Ppm1a    | -0.386252514 | 0.11515597 | 7.96E-04 | 5.52E-03 | ENSMUSG00000021096 |
| Ppm1j    | -1.253302788 | 0.3370838  | 2.01E-04 | 1.77E-03 | ENSMUSG00000002228 |
| Ppme1    | 0.383602139  | 0.14217653 | 6.97E-03 | 3.12E-02 | ENSMUSG00000030718 |
| Ppp1ca   | 0.51257695   | 0.12030279 | 2.04E-05 | 2.69E-04 | ENSMUSG00000040385 |
| Ppp1r10  | 0.671279013  | 0.1891342  | 3.86E-04 | 3.03E-03 | ENSMUSG00000039220 |
| Ppp1r12a | -0.884927327 | 0.21919822 | 5.41E-05 | 6.13E-04 | ENSMUSG00000019907 |
| Ppp1r15a | -0.683334108 | 0.16019545 | 1.99E-05 | 2.64E-04 | ENSMUSG00000040435 |
| Ppp1r1a  | 1.45381736   | 0.46962163 | 1.96E-03 | 1.13E-02 | ENSMUSG00000022490 |
| Ppp1r1b  | 1.812779692  | 0.16176259 | 3.79E-29 | 1.92E-26 | ENSMUSG00000061718 |
| Ppp1r3c  | 0.815241294  | 0.2526008  | 1.25E-03 | 7.93E-03 | ENSMUSG00000067279 |
| Ppp1r9b  | 0.602875742  | 0.15097885 | 6.52E-05 | 7.15E-04 | ENSMUSG00000038976 |
| Ppp2ca   | -0.393476609 | 0.11532769 | 6.45E-04 | 4.63E-03 | ENSMUSG00000020349 |
| Ppp2r2a  | -0.699131808 | 0.15487736 | 6.36E-06 | 9.92E-05 | ENSMUSG00000022052 |
| Ppp2r2d  | -0.492452184 | 0.17370378 | 4.58E-03 | 2.23E-02 | ENSMUSG00000041769 |
| Ppp3ca   | -0.626189418 | 0.18237527 | 5.96E-04 | 4.32E-03 | ENSMUSG00000028161 |

|         |              |            |          |          |                    |
|---------|--------------|------------|----------|----------|--------------------|
| Ppp3cb  | -0.513706041 | 0.17028364 | 2.55E-03 | 1.40E-02 | ENSMUSG00000021816 |
| Ppp4r2  | -0.671651    | 0.20817462 | 1.25E-03 | 7.95E-03 | ENSMUSG00000052144 |
| Ppp4r3a | -0.691516792 | 0.26277437 | 8.50E-03 | 3.62E-02 | ENSMUSG00000041846 |
| Ppp4r3b | -0.948992681 | 0.27581059 | 5.80E-04 | 4.24E-03 | ENSMUSG00000020463 |
| Ppp6c   | -0.457163641 | 0.14884965 | 2.13E-03 | 1.20E-02 | ENSMUSG00000026753 |
| Ppt1    | 0.73497727   | 0.17843081 | 3.80E-05 | 4.53E-04 | ENSMUSG00000028657 |
| Ppt2    | 0.770507389  | 0.19743222 | 9.51E-05 | 9.66E-04 | ENSMUSG00000015474 |
| Pptc7   | -0.757326202 | 0.1830076  | 3.50E-05 | 4.22E-04 | ENSMUSG00000038582 |
| Pqlc2   | 1.139687224  | 0.24753692 | 4.14E-06 | 6.89E-05 | ENSMUSG00000028744 |
| Prdm4   | -0.906554332 | 0.3060452  | 3.05E-03 | 1.61E-02 | ENSMUSG00000035529 |
| Prdx1   | -0.360976193 | 0.10022636 | 3.16E-04 | 2.57E-03 | ENSMUSG00000028691 |
| Prdx4   | 0.304427321  | 0.12008777 | 1.12E-02 | 4.50E-02 | ENSMUSG00000025289 |
| Prdx6   | -0.780049042 | 0.10376611 | 5.59E-14 | 5.25E-12 | ENSMUSG00000026701 |
| Preid1  | 0.689876203  | 0.14476708 | 1.88E-06 | 3.53E-05 | ENSMUSG00000021486 |
| Preid3b | -0.461545996 | 0.1297247  | 3.74E-04 | 2.95E-03 | ENSMUSG00000016257 |
| Prelp   | 1.469671937  | 0.16871234 | 3.01E-18 | 4.95E-16 | ENSMUSG00000041577 |
| Prex1   | 1.094431815  | 0.2357017  | 3.43E-06 | 5.86E-05 | ENSMUSG00000039621 |
| Prkaa1  | -0.479818233 | 0.18241355 | 8.53E-03 | 3.63E-02 | ENSMUSG00000050697 |
| Prkacb  | -0.46719958  | 0.16965457 | 5.89E-03 | 2.72E-02 | ENSMUSG00000005034 |
| Prkar2b | -1.097466076 | 0.24847566 | 1.00E-05 | 1.45E-04 | ENSMUSG00000002997 |
| Prkd1   | -0.732080599 | 0.25669721 | 4.35E-03 | 2.14E-02 | ENSMUSG00000002688 |
| Prkg2   | -1.084198617 | 0.2345255  | 3.78E-06 | 6.41E-05 | ENSMUSG00000029334 |
| Prkx    | -0.940481041 | 0.30007871 | 1.72E-03 | 1.02E-02 | ENSMUSG00000035725 |
| Procr   | -0.976139361 | 0.13607155 | 7.30E-13 | 6.08E-11 | ENSMUSG00000027611 |
| Prpf18  | -0.855837855 | 0.32150324 | 7.77E-03 | 3.38E-02 | ENSMUSG00000039449 |
| Prpf3   | -0.805531718 | 0.23713077 | 6.81E-04 | 4.83E-03 | ENSMUSG00000015748 |
| Prpf38b | -1.332843947 | 0.22873815 | 5.65E-09 | 2.09E-07 | ENSMUSG00000027881 |
| Prpf39  | -1.246589756 | 0.2898295  | 1.70E-05 | 2.30E-04 | ENSMUSG00000035597 |
| Prpf40a | -1.290824425 | 0.21871589 | 3.59E-09 | 1.39E-07 | ENSMUSG00000061136 |
| Prpf4b  | -0.921377234 | 0.25318742 | 2.74E-04 | 2.28E-03 | ENSMUSG00000021413 |
| Prr13   | 0.363737644  | 0.13520523 | 7.14E-03 | 3.17E-02 | ENSMUSG00000023048 |
| Prr3    | 1.053786485  | 0.29102548 | 2.94E-04 | 2.41E-03 | ENSMUSG00000038500 |
| Prr5    | 0.868354606  | 0.19634561 | 9.75E-06 | 1.41E-04 | ENSMUSG00000036106 |
| Prr7    | 1.03621852   | 0.35262016 | 3.30E-03 | 1.71E-02 | ENSMUSG00000034686 |
| Prrc1   | -0.474220191 | 0.13511835 | 4.49E-04 | 3.44E-03 | ENSMUSG00000024594 |
| Prrc2a  | 0.398614675  | 0.14987591 | 7.82E-03 | 3.40E-02 | ENSMUSG00000024393 |
| Prrc2c  | -1.226193682 | 0.43416706 | 4.74E-03 | 2.29E-02 | ENSMUSG00000040225 |
| Prrg3   | 1.106165781  | 0.42027648 | 8.49E-03 | 3.62E-02 | ENSMUSG00000033361 |
| Prrt1   | 1.891456193  | 0.45806251 | 3.64E-05 | 4.36E-04 | ENSMUSG00000015476 |
| Prrx2   | 1.364135356  | 0.14194091 | 7.21E-22 | 1.67E-19 | ENSMUSG00000039476 |
| Psat1   | -0.525265977 | 0.13166909 | 6.63E-05 | 7.22E-04 | ENSMUSG00000024640 |
| Psd4    | 2.59285526   | 0.4277976  | 1.35E-09 | 5.86E-08 | ENSMUSG00000026979 |
| Psip1   | -0.996875386 | 0.3246606  | 2.14E-03 | 1.21E-02 | ENSMUSG00000028484 |

|         |              |            |           |           |                    |
|---------|--------------|------------|-----------|-----------|--------------------|
| Pskh1   | 0.530138757  | 0.16979037 | 1.79E-03  | 1.05E-02  | ENSMUSG00000048310 |
| Psma1   | -0.456546602 | 0.1328925  | 5.92E-04  | 4.30E-03  | ENSMUSG00000030751 |
| Psma2   | -0.387113962 | 0.10965597 | 4.15E-04  | 3.22E-03  | ENSMUSG00000015671 |
| Psma4   | -0.370133799 | 0.13859822 | 7.57E-03  | 3.32E-02  | ENSMUSG00000032301 |
| Psemb1  | -0.333412109 | 0.10345309 | 1.27E-03  | 8.02E-03  | ENSMUSG00000014769 |
| Psemb6  | -0.314127671 | 0.10039441 | 1.75E-03  | 1.03E-02  | ENSMUSG00000018286 |
| Psemb9  | 1.707791575  | 0.62013132 | 5.89E-03  | 2.72E-02  | ENSMUSG00000096687 |
| Psmc2   | -0.588519802 | 0.12121513 | 1.20E-06  | 2.37E-05  | ENSMUSG00000028932 |
| Psmc5   | 0.325617131  | 0.13052362 | 1.26E-02  | 4.91E-02  | ENSMUSG00000020708 |
| Psmc6   | -1.17283202  | 0.17890083 | 5.54E-11  | 3.41E-09  | ENSMUSG00000021832 |
| Psmd1   | -0.641187876 | 0.18256139 | 4.44E-04  | 3.41E-03  | ENSMUSG00000026229 |
| Psmd11  | -0.350237931 | 0.13003773 | 7.07E-03  | 3.15E-02  | ENSMUSG00000017428 |
| Psmd12  | -0.459199387 | 0.16674514 | 5.89E-03  | 2.72E-02  | ENSMUSG00000020720 |
| Psmd14  | -0.807749679 | 0.13442678 | 1.87E-09  | 7.81E-08  | ENSMUSG00000026914 |
| Psmd4   | -0.331482525 | 0.12105351 | 6.18E-03  | 2.82E-02  | ENSMUSG00000005625 |
| Psmd8   | -0.501954059 | 0.11842461 | 2.25E-05  | 2.90E-04  | ENSMUSG00000030591 |
| Psme4   | -0.67425058  | 0.21588133 | 1.79E-03  | 1.05E-02  | ENSMUSG00000040850 |
| Psrc1   | -0.564088453 | 0.20126865 | 5.07E-03  | 2.42E-02  | ENSMUSG00000068744 |
| Ptbp3   | -0.834541812 | 0.1690117  | 7.90E-07  | 1.65E-05  | ENSMUSG00000028382 |
| Ptch1   | 1.6043346    | 0.19071452 | 4.02E-17  | 5.57E-15  | ENSMUSG00000021466 |
| Ptch2   | 1.74526278   | 0.52173731 | 8.23E-04  | 5.67E-03  | ENSMUSG00000028681 |
| Ptges3  | -0.493935242 | 0.14558463 | 6.92E-04  | 4.89E-03  | ENSMUSG00000071072 |
| Ptgis   | 1.001056967  | 0.19128677 | 1.67E-07  | 4.14E-06  | ENSMUSG00000017969 |
| Ptgs1   | 0.587934336  | 0.20969767 | 5.05E-03  | 2.41E-02  | ENSMUSG00000047250 |
| Ptgs2   | -2.320295078 | 0.19682447 | 4.47E-32  | 2.94E-29  | ENSMUSG00000032487 |
| Ptgs2os | 1.08964309   | 0.27993962 | 9.92E-05  | 9.97E-04  | ENSMUSG00000096981 |
| Pth1r   | 2.793351112  | 0.11894713 | 5.95E-122 | 7.83E-118 | ENSMUSG00000032492 |
| Ptk2    | -0.662385606 | 0.2160365  | 2.17E-03  | 1.22E-02  | ENSMUSG00000022607 |
| Ptk2b   | 1.07926004   | 0.39397344 | 6.15E-03  | 2.81E-02  | ENSMUSG00000059456 |
| Ptk7    | 0.717254081  | 0.14420041 | 6.56E-07  | 1.39E-05  | ENSMUSG00000023972 |
| Ptms    | 0.729395744  | 0.11938784 | 1.00E-09  | 4.49E-08  | ENSMUSG00000030122 |
| Ptov1   | 0.595652749  | 0.14019246 | 2.15E-05  | 2.79E-04  | ENSMUSG00000038502 |
| Ptp4a1  | -0.658848698 | 0.21179986 | 1.87E-03  | 1.09E-02  | ENSMUSG00000026064 |
| Ptp4a2  | -0.528067358 | 0.12516748 | 2.46E-05  | 3.12E-04  | ENSMUSG00000028788 |
| Ptpa    | 0.348815372  | 0.13410855 | 9.30E-03  | 3.88E-02  | ENSMUSG00000039515 |
| Ptpn12  | -0.679913683 | 0.19460335 | 4.76E-04  | 3.60E-03  | ENSMUSG00000028771 |
| Ptpn2   | -0.791881439 | 0.2803903  | 4.74E-03  | 2.29E-02  | ENSMUSG00000024539 |
| Ptpre   | -1.171336051 | 0.39112984 | 2.75E-03  | 1.48E-02  | ENSMUSG00000041836 |
| Ptprf   | 0.602088157  | 0.17153865 | 4.48E-04  | 3.44E-03  | ENSMUSG00000033295 |
| Ptprv   | 0.625888966  | 0.16738999 | 1.85E-04  | 1.65E-03  | ENSMUSG00000097971 |
| Ptprz1  | 3.147168795  | 0.85421745 | 2.29E-04  | 1.97E-03  | ENSMUSG00000068748 |
| Pts     | 0.773008412  | 0.25029459 | 2.01E-03  | 1.15E-02  | ENSMUSG00000032067 |
| Pum1    | -0.405293615 | 0.14573049 | 5.42E-03  | 2.55E-02  | ENSMUSG00000028580 |



|           |              |            |          |          |                    |
|-----------|--------------|------------|----------|----------|--------------------|
| Pum2      | -0.643172333 | 0.20064914 | 1.35E-03 | 8.39E-03 | ENSMUSG00000020594 |
| Pum3      | -0.889289845 | 0.28086104 | 1.54E-03 | 9.33E-03 | ENSMUSG00000041360 |
| Purb      | -0.535422166 | 0.19564509 | 6.21E-03 | 2.84E-02 | ENSMUSG00000093904 |
| Pvr       | -0.455674231 | 0.16681787 | 6.30E-03 | 2.87E-02 | ENSMUSG00000040511 |
| Pvt1      | -1.428540632 | 0.50852547 | 4.97E-03 | 2.39E-02 | ENSMUSG00000097028 |
| Pwwp2b    | 1.070755316  | 0.40274881 | 7.85E-03 | 3.41E-02 | ENSMUSG00000060260 |
| Pwwp3a    | 0.766374565  | 0.23149288 | 9.31E-04 | 6.27E-03 | ENSMUSG00000020156 |
| Pxmp4     | 0.612351262  | 0.16851289 | 2.79E-04 | 2.32E-03 | ENSMUSG00000000876 |
| Pygl      | 0.568989907  | 0.16010499 | 3.80E-04 | 2.99E-03 | ENSMUSG00000021069 |
| Pyroxd2   | 1.591768757  | 0.57849664 | 5.93E-03 | 2.74E-02 | ENSMUSG00000060224 |
| Pyurf     | 0.670097362  | 0.21106281 | 1.50E-03 | 9.12E-03 | ENSMUSG00000043162 |
| Qpctl     | 0.699671243  | 0.22509998 | 1.88E-03 | 1.09E-02 | ENSMUSG00000030407 |
| Qser1     | -0.923725623 | 0.18168946 | 3.69E-07 | 8.36E-06 | ENSMUSG00000074994 |
| R3hdm4    | 0.324249365  | 0.12373716 | 8.78E-03 | 3.72E-02 | ENSMUSG00000035781 |
| Rab10     | -0.742112717 | 0.12561889 | 3.47E-09 | 1.35E-07 | ENSMUSG00000020671 |
| Rab11fip4 | 1.471590103  | 0.37432703 | 8.45E-05 | 8.75E-04 | ENSMUSG00000017639 |
| Rab14     | -0.610358783 | 0.14652248 | 3.10E-05 | 3.82E-04 | ENSMUSG00000026878 |
| Rab18     | -0.555814168 | 0.12279689 | 6.00E-06 | 9.45E-05 | ENSMUSG00000073639 |
| Rab1a     | -0.67648607  | 0.13838584 | 1.02E-06 | 2.06E-05 | ENSMUSG00000020149 |
| Rab1b     | 0.604624221  | 0.1284222  | 2.50E-06 | 4.48E-05 | ENSMUSG00000024870 |
| Rab24     | 0.389530071  | 0.12146901 | 1.34E-03 | 8.35E-03 | ENSMUSG00000034789 |
| Rab27b    | -1.550997663 | 0.60045555 | 9.79E-03 | 4.05E-02 | ENSMUSG00000024511 |
| Rab2a     | -0.353160637 | 0.1095019  | 1.26E-03 | 7.98E-03 | ENSMUSG00000047187 |
| Rab33b    | -0.563227199 | 0.18608795 | 2.47E-03 | 1.36E-02 | ENSMUSG00000027739 |
| Rab34     | 0.498729842  | 0.1176287  | 2.24E-05 | 2.89E-04 | ENSMUSG00000002059 |
| Rab38     | 1.913882976  | 0.47034432 | 4.72E-05 | 5.45E-04 | ENSMUSG00000030559 |
| Rab3il1   | 0.633373857  | 0.23650659 | 7.41E-03 | 3.27E-02 | ENSMUSG00000024663 |
| Rab3ip    | -1.170390862 | 0.28643486 | 4.39E-05 | 5.13E-04 | ENSMUSG00000064181 |
| Rab6a     | -0.403777917 | 0.13787688 | 3.41E-03 | 1.76E-02 | ENSMUSG00000030704 |
| Rab7b     | -0.677498072 | 0.17442217 | 1.03E-04 | 1.02E-03 | ENSMUSG00000052688 |
| Rab9      | -0.814694215 | 0.15730262 | 2.23E-07 | 5.35E-06 | ENSMUSG00000079316 |
| Rabep1    | -0.703172316 | 0.2658471  | 8.17E-03 | 3.51E-02 | ENSMUSG00000020817 |
| Rabggtb   | -1.016337046 | 0.12772066 | 1.76E-15 | 2.03E-13 | ENSMUSG00000038975 |
| Rack1     | -0.5161137   | 0.11027236 | 2.86E-06 | 5.03E-05 | ENSMUSG00000020372 |
| Rad1      | -0.434325851 | 0.16933975 | 1.03E-02 | 4.22E-02 | ENSMUSG00000022248 |
| Rad17     | -0.868564322 | 0.28190868 | 2.06E-03 | 1.17E-02 | ENSMUSG00000021635 |
| Rad18     | -1.051488766 | 0.38441944 | 6.23E-03 | 2.85E-02 | ENSMUSG00000030254 |
| Rad21     | -0.686420426 | 0.15410758 | 8.42E-06 | 1.25E-04 | ENSMUSG00000022314 |
| Rad23b    | -0.354736234 | 0.10588432 | 8.07E-04 | 5.59E-03 | ENSMUSG00000028426 |
| Rad50     | -1.007023334 | 0.29488637 | 6.38E-04 | 4.58E-03 | ENSMUSG00000020380 |
| Rala      | -0.610127522 | 0.11629959 | 1.55E-07 | 3.89E-06 | ENSMUSG00000008859 |
| Ralbp1    | -0.361512999 | 0.12623878 | 4.19E-03 | 2.07E-02 | ENSMUSG00000024096 |
| Ralgapb   | -0.974329189 | 0.24288753 | 6.03E-05 | 6.71E-04 | ENSMUSG00000027652 |

|          |              |            |          |          |                     |
|----------|--------------|------------|----------|----------|---------------------|
| Ramp1    | 1.436166367  | 0.21982602 | 6.44E-11 | 3.89E-09 | ENSMUSG00000034353  |
| Ramp2    | 1.96638718   | 0.16913326 | 3.03E-31 | 1.73E-28 | ENSMUSG00000001240  |
| Ranbp1   | -0.339504187 | 0.1335883  | 1.10E-02 | 4.44E-02 | ENSMUSG00000005732  |
| Ranbp2   | -0.7814936   | 0.3073114  | 1.10E-02 | 4.43E-02 | ENSMUSG00000003226  |
| Ranbp9   | -0.690190833 | 0.22377943 | 2.04E-03 | 1.16E-02 | ENSMUSG00000038546  |
| Rap1b    | -0.56832975  | 0.12456855 | 5.06E-06 | 8.17E-05 | ENSMUSG000000052681 |
| Rap1gap  | 1.943161247  | 0.61223853 | 1.50E-03 | 9.15E-03 | ENSMUSG000000041351 |
| Rapgef6  | -1.637233886 | 0.35505845 | 4.00E-06 | 6.69E-05 | ENSMUSG00000037533  |
| Rara     | 0.771817487  | 0.23329699 | 9.39E-04 | 6.31E-03 | ENSMUSG00000037992  |
| Rarres2  | 0.993614393  | 0.30143136 | 9.80E-04 | 6.51E-03 | ENSMUSG00000009281  |
| Rars     | -0.954429724 | 0.19552339 | 1.05E-06 | 2.12E-05 | ENSMUSG00000018848  |
| Rasa1    | -0.918734159 | 0.24913141 | 2.26E-04 | 1.95E-03 | ENSMUSG00000021549  |
| Rasa2    | -1.069908368 | 0.30551757 | 4.62E-04 | 3.52E-03 | ENSMUSG00000032413  |
| Rasd1    | 1.52137844   | 0.52205718 | 3.57E-03 | 1.82E-02 | ENSMUSG00000049892  |
| Rasd2    | -1.506320319 | 0.60452383 | 1.27E-02 | 4.94E-02 | ENSMUSG00000034472  |
| Rasgef1b | -2.974495726 | 0.98874661 | 2.63E-03 | 1.43E-02 | ENSMUSG00000089809  |
| Rasgrp2  | 1.510473137  | 0.25362046 | 2.59E-09 | 1.04E-07 | ENSMUSG00000032946  |
| Rasl11b  | 1.084990085  | 0.21484376 | 4.41E-07 | 9.80E-06 | ENSMUSG00000049907  |
| Rassf1   | -0.50945346  | 0.16622277 | 2.18E-03 | 1.23E-02 | ENSMUSG00000010067  |
| Rassf2   | 1.477188736  | 0.24437372 | 1.50E-09 | 6.39E-08 | ENSMUSG00000027339  |
| Rb1cc1   | -0.847642418 | 0.32937    | 1.01E-02 | 4.14E-02 | ENSMUSG00000025907  |
| Rbbp8    | -1.140902951 | 0.42524291 | 7.30E-03 | 3.23E-02 | ENSMUSG00000041238  |
| Rbm25    | -1.09494785  | 0.37327395 | 3.35E-03 | 1.73E-02 | ENSMUSG00000010608  |
| Rbm28    | -0.885274361 | 0.20553183 | 1.65E-05 | 2.25E-04 | ENSMUSG00000029701  |
| Rbm33    | -0.924393568 | 0.26360621 | 4.54E-04 | 3.46E-03 | ENSMUSG00000048271  |
| Rbm34    | -0.939973683 | 0.3357121  | 5.11E-03 | 2.43E-02 | ENSMUSG00000033931  |
| Rbm39    | -0.737981164 | 0.16074903 | 4.41E-06 | 7.28E-05 | ENSMUSG00000027620  |
| Rbm45    | 1.063780678  | 0.27426516 | 1.05E-04 | 1.04E-03 | ENSMUSG00000042369  |
| Rbm6     | -0.911621724 | 0.30856078 | 3.13E-03 | 1.64E-02 | ENSMUSG00000032582  |
| Rbm7     | -0.77533578  | 0.17483811 | 9.22E-06 | 1.35E-04 | ENSMUSG00000042396  |
| Rbm8a    | -0.379433594 | 0.11801515 | 1.30E-03 | 8.19E-03 | ENSMUSG00000038374  |
| Rbms1    | -0.9311876   | 0.1773295  | 1.51E-07 | 3.80E-06 | ENSMUSG00000026970  |
| Rbms2    | 0.387603075  | 0.15038446 | 9.95E-03 | 4.10E-02 | ENSMUSG00000040043  |
| Rbms3    | -0.53217279  | 0.20568047 | 9.67E-03 | 4.02E-02 | ENSMUSG00000039607  |
| Rbpj     | -1.462084153 | 0.18703659 | 5.41E-15 | 5.74E-13 | ENSMUSG00000039191  |
| Rcan2    | 1.714428186  | 0.28089261 | 1.04E-09 | 4.59E-08 | ENSMUSG00000039601  |
| Rcc1l    | -0.51886031  | 0.18874692 | 5.98E-03 | 2.75E-02 | ENSMUSG00000061979  |
| Rcn3     | 0.282274959  | 0.10059549 | 5.02E-03 | 2.40E-02 | ENSMUSG00000019539  |
| Rcor2    | 0.613791339  | 0.20517712 | 2.78E-03 | 1.49E-02 | ENSMUSG00000024968  |
| Rcsd1    | 1.066024985  | 0.35161889 | 2.43E-03 | 1.34E-02 | ENSMUSG00000040723  |
| Rdh13    | -0.690557899 | 0.25375733 | 6.50E-03 | 2.94E-02 | ENSMUSG00000008435  |
| Rdx      | -1.007982257 | 0.19832196 | 3.72E-07 | 8.41E-06 | ENSMUSG00000032050  |
| Reep3    | -0.441990817 | 0.15649021 | 4.74E-03 | 2.29E-02 | ENSMUSG00000019873  |

|          |              |            |          |          |                    |
|----------|--------------|------------|----------|----------|--------------------|
| Rel1     | -0.769314566 | 0.17641104 | 1.30E-05 | 1.82E-04 | ENSMUSG00000047881 |
| Rer1     | -0.383255354 | 0.13008522 | 3.22E-03 | 1.68E-02 | ENSMUSG00000029048 |
| Retn     | 1.067395614  | 0.42129333 | 1.13E-02 | 4.51E-02 | ENSMUSG00000012705 |
| Retreg1  | -0.896397909 | 0.29755482 | 2.59E-03 | 1.41E-02 | ENSMUSG00000022270 |
| Retsat   | 0.877389222  | 0.22545554 | 9.96E-05 | 1.00E-03 | ENSMUSG00000056666 |
| Rev3l    | -0.923609961 | 0.33507584 | 5.84E-03 | 2.71E-02 | ENSMUSG00000019841 |
| Rex1bd   | 0.601180056  | 0.1721444  | 4.79E-04 | 3.62E-03 | ENSMUSG00000058833 |
| Rexo2    | 0.554772566  | 0.09874429 | 1.93E-08 | 6.35E-07 | ENSMUSG00000032026 |
| Rfc1     | -0.628415324 | 0.24418749 | 1.01E-02 | 4.14E-02 | ENSMUSG00000029191 |
| Rfc5     | 0.897580597  | 0.25530115 | 4.38E-04 | 3.37E-03 | ENSMUSG00000029363 |
| Rffl     | -1.404767737 | 0.39912444 | 4.32E-04 | 3.33E-03 | ENSMUSG00000020696 |
| Rflna    | 1.244433117  | 0.35689756 | 4.89E-04 | 3.68E-03 | ENSMUSG00000037962 |
| Rflnb    | -0.431689649 | 0.14879151 | 3.72E-03 | 1.88E-02 | ENSMUSG00000020846 |
| Rfng     | 0.766123812  | 0.26466422 | 3.80E-03 | 1.91E-02 | ENSMUSG00000025158 |
| Rftn1    | 0.616988832  | 0.24254029 | 1.10E-02 | 4.42E-02 | ENSMUSG00000039316 |
| Rgs1     | -3.180803336 | 0.47568806 | 2.28E-11 | 1.50E-09 | ENSMUSG00000026358 |
| Rgs10    | -0.4492275   | 0.15830513 | 4.54E-03 | 2.21E-02 | ENSMUSG00000030844 |
| Rgs16    | -1.058882946 | 0.25546161 | 3.40E-05 | 4.13E-04 | ENSMUSG00000026475 |
| Rgs17    | -1.080297098 | 0.19290186 | 2.14E-08 | 6.89E-07 | ENSMUSG00000019775 |
| Rgs2     | 0.873144431  | 0.1570209  | 2.69E-08 | 8.44E-07 | ENSMUSG00000026360 |
| Rgs4     | -0.745837878 | 0.25678925 | 3.68E-03 | 1.87E-02 | ENSMUSG00000038530 |
| Rgs5     | -0.592316917 | 0.2047123  | 3.81E-03 | 1.92E-02 | ENSMUSG00000026678 |
| Rhbdd1   | -0.76262743  | 0.16012384 | 1.91E-06 | 3.57E-05 | ENSMUSG00000026142 |
| Rhbdd2   | 1.913035498  | 0.34358171 | 2.58E-08 | 8.12E-07 | ENSMUSG00000039917 |
| Rheb     | -0.705244427 | 0.15406196 | 4.70E-06 | 7.69E-05 | ENSMUSG00000028945 |
| Rhob     | 0.684962645  | 0.12630525 | 5.86E-08 | 1.65E-06 | ENSMUSG00000054364 |
| Rhobtb3  | -0.634330156 | 0.23994275 | 8.20E-03 | 3.52E-02 | ENSMUSG00000021589 |
| Rhoq     | -0.67839276  | 0.16358996 | 3.37E-05 | 4.10E-04 | ENSMUSG00000024143 |
| Rhot1    | -0.622549548 | 0.19873198 | 1.73E-03 | 1.02E-02 | ENSMUSG00000017686 |
| Rictor   | -1.087862825 | 0.27800575 | 9.11E-05 | 9.32E-04 | ENSMUSG00000050310 |
| Rif1     | -0.955225725 | 0.37654331 | 1.12E-02 | 4.49E-02 | ENSMUSG00000036202 |
| Rilpl2   | 0.437161595  | 0.14131223 | 1.98E-03 | 1.13E-02 | ENSMUSG00000029401 |
| Riok2    | 0.522062367  | 0.16777597 | 1.86E-03 | 1.08E-02 | ENSMUSG00000116138 |
| Riok3    | -0.899370484 | 0.16737541 | 7.73E-08 | 2.12E-06 | ENSMUSG00000024404 |
| Rit1     | 0.332464068  | 0.11210991 | 3.02E-03 | 1.59E-02 | ENSMUSG00000028057 |
| Rlf      | -1.016805935 | 0.2493632  | 4.55E-05 | 5.30E-04 | ENSMUSG00000049878 |
| Rlim     | -0.943472582 | 0.1941702  | 1.18E-06 | 2.33E-05 | ENSMUSG00000056537 |
| Rmnd5a   | -0.615119895 | 0.24249191 | 1.12E-02 | 4.49E-02 | ENSMUSG00000002222 |
| Rnase4   | 0.721037252  | 0.15280023 | 2.37E-06 | 4.29E-05 | ENSMUSG00000021876 |
| Rnaseh2a | -0.569905019 | 0.17920258 | 1.47E-03 | 8.97E-03 | ENSMUSG00000052926 |
| Rnd1     | -2.290912808 | 0.49850769 | 4.32E-06 | 7.14E-05 | ENSMUSG00000054855 |
| Rnd2     | 0.710115652  | 0.12524192 | 1.43E-08 | 4.86E-07 | ENSMUSG00000001313 |
| Rnf11    | -0.746387923 | 0.12417143 | 1.84E-09 | 7.76E-08 | ENSMUSG00000028557 |

|            |              |            |          |          |                    |
|------------|--------------|------------|----------|----------|--------------------|
| Rnf123     | 0.548326282  | 0.18911148 | 3.74E-03 | 1.89E-02 | ENSMUSG00000041528 |
| Rnf126     | 0.464703222  | 0.1580197  | 3.27E-03 | 1.70E-02 | ENSMUSG00000035890 |
| Rnf138     | -1.133138443 | 0.28154179 | 5.70E-05 | 6.38E-04 | ENSMUSG00000024317 |
| Rnf141     | -0.622690994 | 0.22344504 | 5.32E-03 | 2.52E-02 | ENSMUSG00000030788 |
| Rnf181     | 0.335909432  | 0.1114485  | 2.58E-03 | 1.41E-02 | ENSMUSG00000055850 |
| Rnf2       | -0.484743284 | 0.17002457 | 4.36E-03 | 2.14E-02 | ENSMUSG00000026484 |
| Rnf20      | -0.732958204 | 0.18079734 | 5.03E-05 | 5.75E-04 | ENSMUSG00000028309 |
| Rnf219     | -0.80875264  | 0.32387474 | 1.25E-02 | 4.89E-02 | ENSMUSG00000022120 |
| Rnf4       | -0.438960781 | 0.16462761 | 7.67E-03 | 3.35E-02 | ENSMUSG00000029110 |
| Rnf6       | -1.029156956 | 0.35915152 | 4.16E-03 | 2.06E-02 | ENSMUSG00000029634 |
| Rnmt       | -1.198615517 | 0.18237682 | 4.96E-11 | 3.14E-09 | ENSMUSG00000009535 |
| Ro60       | -1.17442696  | 0.26163906 | 7.16E-06 | 1.10E-04 | ENSMUSG00000018199 |
| Rock1      | -1.211669108 | 0.42760438 | 4.60E-03 | 2.24E-02 | ENSMUSG00000024290 |
| Rom1       | 1.391894212  | 0.27890101 | 6.02E-07 | 1.29E-05 | ENSMUSG00000071648 |
| Ropn1l     | 1.530225491  | 0.576583   | 7.96E-03 | 3.45E-02 | ENSMUSG00000022236 |
| Rora       | -1.219032466 | 0.27882352 | 1.23E-05 | 1.74E-04 | ENSMUSG00000032238 |
| Rpain      | -0.554100566 | 0.17168054 | 1.25E-03 | 7.93E-03 | ENSMUSG00000018449 |
| Rpf2       | -1.020861841 | 0.24773704 | 3.78E-05 | 4.50E-04 | ENSMUSG00000038510 |
| Rpl11      | -0.542388616 | 0.12584609 | 1.63E-05 | 2.22E-04 | ENSMUSG00000059291 |
| Rpl12      | -0.643524046 | 0.1517774  | 2.24E-05 | 2.89E-04 | ENSMUSG00000038900 |
| Rpl13      | -0.51664394  | 0.09949586 | 2.07E-07 | 5.01E-06 | ENSMUSG00000000740 |
| Rpl13a     | -0.47532047  | 0.11933181 | 6.80E-05 | 7.38E-04 | ENSMUSG00000074129 |
| Rpl13a-ps1 | -0.671416496 | 0.26949394 | 1.27E-02 | 4.95E-02 | ENSMUSG00000062083 |
| Rpl14      | -0.570968764 | 0.09774106 | 5.17E-09 | 1.93E-07 | ENSMUSG00000025794 |
| Rpl15-ps5  | -1.432753012 | 0.14654761 | 1.42E-22 | 3.73E-20 | ENSMUSG00000108414 |
| Rpl17      | -0.813339436 | 0.14339538 | 1.41E-08 | 4.81E-07 | ENSMUSG00000062328 |
| Rpl18      | -0.48810616  | 0.11114822 | 1.13E-05 | 1.61E-04 | ENSMUSG00000059070 |
| Rpl18-ps1  | -0.460003385 | 0.16743353 | 6.01E-03 | 2.76E-02 | ENSMUSG00000081382 |
| Rpl18a-ps1 | -1.61388468  | 0.63383998 | 1.09E-02 | 4.40E-02 | ENSMUSG00000059033 |
| Rpl19      | -0.483474573 | 0.16700473 | 3.79E-03 | 1.91E-02 | ENSMUSG00000017404 |
| Rpl22      | -0.627434838 | 0.12763096 | 8.83E-07 | 1.82E-05 | ENSMUSG00000028936 |
| Rpl22l1    | -0.463611305 | 0.13552454 | 6.24E-04 | 4.50E-03 | ENSMUSG00000039221 |
| Rpl23      | -0.708571704 | 0.1561893  | 5.72E-06 | 9.06E-05 | ENSMUSG00000071415 |
| Rpl23a     | -0.578227329 | 0.21934789 | 8.39E-03 | 3.58E-02 | ENSMUSG00000058546 |
| Rpl26      | -0.73027447  | 0.11786653 | 5.80E-10 | 2.81E-08 | ENSMUSG00000060938 |
| Rpl26-ps2  | -1.512889752 | 0.53522301 | 4.70E-03 | 2.28E-02 | ENSMUSG00000066489 |
| Rpl28-ps1  | -1.305158088 | 0.50969476 | 1.04E-02 | 4.26E-02 | ENSMUSG00000058603 |
| Rpl3       | -0.446749395 | 0.17278628 | 9.72E-03 | 4.03E-02 | ENSMUSG00000060036 |
| Rpl31      | -0.573056685 | 0.10479136 | 4.54E-08 | 1.33E-06 | ENSMUSG00000073702 |
| Rpl31-ps8  | -0.73149624  | 0.14358175 | 3.49E-07 | 7.96E-06 | ENSMUSG00000067870 |
| Rpl32      | -0.595675999 | 0.10788993 | 3.37E-08 | 1.03E-06 | ENSMUSG00000057841 |
| Rpl34      | -0.47619969  | 0.11899446 | 6.28E-05 | 6.95E-04 | ENSMUSG00000062006 |
| Rpl35a     | -0.688168409 | 0.19538877 | 4.28E-04 | 3.31E-03 | ENSMUSG00000060636 |

|            |              |            |          |          |                    |
|------------|--------------|------------|----------|----------|--------------------|
| Rpl36-ps12 | -0.730203473 | 0.25294389 | 3.89E-03 | 1.96E-02 | ENSMUSG00000091845 |
| Rpl36a     | -1.047494779 | 0.39531973 | 8.06E-03 | 3.48E-02 | ENSMUSG00000079435 |
| Rpl37      | -0.568505606 | 0.12178184 | 3.04E-06 | 5.29E-05 | ENSMUSG00000041841 |
| Rpl37a     | -0.423559139 | 0.12253655 | 5.47E-04 | 4.03E-03 | ENSMUSG00000046330 |
| Rpl37rt    | -0.612176564 | 0.19802535 | 1.99E-03 | 1.14E-02 | ENSMUSG00000072692 |
| Rpl38      | -0.596425333 | 0.17437652 | 6.25E-04 | 4.50E-03 | ENSMUSG00000057322 |
| Rpl39      | -0.557788514 | 0.13833788 | 5.53E-05 | 6.24E-04 | ENSMUSG00000079641 |
| Rpl4       | -0.726084399 | 0.11706589 | 5.56E-10 | 2.70E-08 | ENSMUSG00000032399 |
| Rpl6       | -0.459594943 | 0.14568171 | 1.61E-03 | 9.63E-03 | ENSMUSG00000029614 |
| Rpl7-ps7   | 1.401255984  | 0.44021625 | 1.46E-03 | 8.90E-03 | ENSMUSG00000106447 |
| Rpl7a      | -0.819301966 | 0.3146413  | 9.22E-03 | 3.86E-02 | ENSMUSG00000062647 |
| Rpl8       | -0.41112138  | 0.10187992 | 5.45E-05 | 6.16E-04 | ENSMUSG00000003970 |
| Rplp1      | -0.363965746 | 0.09359496 | 1.01E-04 | 1.01E-03 | ENSMUSG00000007892 |
| Rplp2      | -0.522989885 | 0.17800726 | 3.30E-03 | 1.71E-02 | ENSMUSG00000025508 |
| Rpn2       | 0.297673629  | 0.10628733 | 5.10E-03 | 2.43E-02 | ENSMUSG00000027642 |
| Rpp21      | 0.374942365  | 0.14995087 | 1.24E-02 | 4.86E-02 | ENSMUSG00000024446 |
| Rpp30      | -0.709011565 | 0.20678172 | 6.06E-04 | 4.39E-03 | ENSMUSG00000024800 |
| Rps10      | -0.490411801 | 0.13679393 | 3.37E-04 | 2.72E-03 | ENSMUSG00000052146 |
| Rps12      | -0.828773397 | 0.2299975  | 3.14E-04 | 2.56E-03 | ENSMUSG00000061983 |
| Rps13-ps2  | -0.570780131 | 0.13447131 | 2.19E-05 | 2.83E-04 | ENSMUSG00000069972 |
| Rps13-ps5  | -0.966678762 | 0.29871668 | 1.21E-03 | 7.76E-03 | ENSMUSG00000082626 |
| Rps14      | -0.548884448 | 0.12800091 | 1.80E-05 | 2.41E-04 | ENSMUSG00000024608 |
| Rps15      | -0.452303154 | 0.14385121 | 1.67E-03 | 9.95E-03 | ENSMUSG00000063457 |
| Rps15a     | -0.61153283  | 0.11157932 | 4.24E-08 | 1.25E-06 | ENSMUSG00000008683 |
| Rps18      | -0.44473195  | 0.1671257  | 7.79E-03 | 3.39E-02 | ENSMUSG00000008668 |
| Rps19      | -0.509665316 | 0.13343127 | 1.34E-04 | 1.27E-03 | ENSMUSG00000040952 |
| Rps19-ps11 | -0.584875963 | 0.21942068 | 7.69E-03 | 3.36E-02 | ENSMUSG00000089839 |
| Rps19bp1   | -0.452298648 | 0.14461475 | 1.76E-03 | 1.04E-02 | ENSMUSG00000051518 |
| Rps20      | -0.509914461 | 0.10528311 | 1.28E-06 | 2.49E-05 | ENSMUSG00000028234 |
| Rps21      | -0.496476257 | 0.12539888 | 7.52E-05 | 8.00E-04 | ENSMUSG00000039001 |
| Rps24      | -0.618795092 | 0.11733179 | 1.34E-07 | 3.42E-06 | ENSMUSG00000025290 |
| Rps24-ps3  | -0.799969954 | 0.29545092 | 6.78E-03 | 3.05E-02 | ENSMUSG00000081049 |
| Rps25-ps1  | -0.789689277 | 0.19629546 | 5.75E-05 | 6.42E-04 | ENSMUSG00000067344 |
| Rps26      | -0.453904492 | 0.11147598 | 4.67E-05 | 5.41E-04 | ENSMUSG00000025362 |
| Rps27l     | -0.47287932  | 0.10915913 | 1.48E-05 | 2.03E-04 | ENSMUSG00000036781 |
| Rps28      | -0.409068522 | 0.12552667 | 1.12E-03 | 7.25E-03 | ENSMUSG00000067288 |
| Rps3       | -0.691208597 | 0.10990898 | 3.20E-10 | 1.63E-08 | ENSMUSG00000030744 |
| Rps3a1     | -0.884796886 | 0.22343776 | 7.50E-05 | 7.99E-04 | ENSMUSG00000028081 |
| Rps4l      | 0.467628425  | 0.17133097 | 6.35E-03 | 2.89E-02 | ENSMUSG00000063171 |
| Rps5       | -0.474074664 | 0.11127704 | 2.04E-05 | 2.69E-04 | ENSMUSG00000012848 |
| Rps6ka3    | -0.652802797 | 0.24057687 | 6.66E-03 | 3.00E-02 | ENSMUSG00000031309 |
| Rps6ka4    | 0.454387421  | 0.17752018 | 1.05E-02 | 4.27E-02 | ENSMUSG00000024952 |
| Rps6kb1    | -0.59320228  | 0.23757153 | 1.25E-02 | 4.89E-02 | ENSMUSG00000020516 |

|         |              |            |          |          |                     |
|---------|--------------|------------|----------|----------|---------------------|
| Rps8    | -0.534046792 | 0.10798441 | 7.59E-07 | 1.59E-05 | ENSMUSG00000047675  |
| Rps9    | -0.321923116 | 0.10693336 | 2.61E-03 | 1.42E-02 | ENSMUSG00000006333  |
| Rras2   | -0.366934829 | 0.13835797 | 8.00E-03 | 3.46E-02 | ENSMUSG00000055723  |
| Rrp15   | -0.953287751 | 0.24947305 | 1.33E-04 | 1.26E-03 | ENSMUSG00000001305  |
| Rsb1    | -0.904710371 | 0.18206734 | 6.73E-07 | 1.42E-05 | ENSMUSG00000044098  |
| Rsb1l   | -0.897433692 | 0.20234585 | 9.20E-06 | 1.35E-04 | ENSMUSG000000039968 |
| Rsf1    | -1.01290802  | 0.29762146 | 6.66E-04 | 4.73E-03 | ENSMUSG000000035623 |
| Rsl1d1  | -1.060359825 | 0.15439495 | 6.52E-12 | 4.64E-10 | ENSMUSG00000005846  |
| Rsph9   | 1.842697285  | 0.40421793 | 5.15E-06 | 8.27E-05 | ENSMUSG00000023966  |
| Rspry1  | -0.785571992 | 0.27272948 | 3.97E-03 | 1.98E-02 | ENSMUSG000000050079 |
| Rsrc2   | -0.709446155 | 0.18305819 | 1.06E-04 | 1.05E-03 | ENSMUSG00000029422  |
| Rtf1    | -0.724666475 | 0.23146483 | 1.74E-03 | 1.03E-02 | ENSMUSG00000027304  |
| Rtf2    | 0.528084767  | 0.13990205 | 1.60E-04 | 1.47E-03 | ENSMUSG00000027502  |
| Rtl8b   | 0.739694011  | 0.1663178  | 8.69E-06 | 1.29E-04 | ENSMUSG000000067924 |
| Rtn4    | -0.463265057 | 0.11557791 | 6.12E-05 | 6.79E-04 | ENSMUSG000000020458 |
| Rtn4rl1 | 1.963969271  | 0.40146616 | 9.98E-07 | 2.03E-05 | ENSMUSG00000045287  |
| Rtraf   | -0.690360665 | 0.1356148  | 3.57E-07 | 8.12E-06 | ENSMUSG00000021807  |
| Runx1   | -0.91639793  | 0.16480735 | 2.69E-08 | 8.44E-07 | ENSMUSG000000022952 |
| Runx2   | 0.736228725  | 0.25738099 | 4.23E-03 | 2.09E-02 | ENSMUSG000000039153 |
| Runx3   | 0.467046725  | 0.15921774 | 3.35E-03 | 1.73E-02 | ENSMUSG000000070691 |
| Rusc2   | -0.446025249 | 0.14452445 | 2.03E-03 | 1.16E-02 | ENSMUSG000000035969 |
| Ruvbl2  | -0.548138258 | 0.1608376  | 6.54E-04 | 4.68E-03 | ENSMUSG000000003868 |
| Rxra    | 0.389483882  | 0.14104836 | 5.76E-03 | 2.68E-02 | ENSMUSG000000015846 |
| S100a1  | 0.923666397  | 0.14316669 | 1.11E-10 | 6.25E-09 | ENSMUSG00000044080  |
| S100a10 | 0.50427844   | 0.10033086 | 5.00E-07 | 1.09E-05 | ENSMUSG00000041959  |
| S100a11 | 0.703705548  | 0.10735921 | 5.58E-11 | 3.41E-09 | ENSMUSG000000027907 |
| S100a13 | 0.964749135  | 0.16072018 | 1.94E-09 | 8.06E-08 | ENSMUSG000000042312 |
| S100a16 | 0.517999966  | 0.11309727 | 4.65E-06 | 7.62E-05 | ENSMUSG000000074457 |
| S100a4  | 1.866932931  | 0.13847073 | 1.98E-41 | 3.26E-38 | ENSMUSG000000001020 |
| S100a6  | 0.894258581  | 0.09281678 | 5.71E-22 | 1.34E-19 | ENSMUSG000000001025 |
| S100b   | 0.890088649  | 0.16283799 | 4.60E-08 | 1.34E-06 | ENSMUSG000000033208 |
| S1pr1   | 1.38171321   | 0.28199534 | 9.59E-07 | 1.96E-05 | ENSMUSG00000045092  |
| Saa1    | -2.42544854  | 0.80084394 | 2.46E-03 | 1.35E-02 | ENSMUSG000000074115 |
| Saa3    | -2.192345565 | 0.20136116 | 1.32E-27 | 5.79E-25 | ENSMUSG000000040026 |
| Sacm1l  | -0.906500477 | 0.25214986 | 3.24E-04 | 2.63E-03 | ENSMUSG000000025240 |
| Sacs    | -2.089977877 | 0.66674991 | 1.72E-03 | 1.02E-02 | ENSMUSG000000048279 |
| Samd4   | -0.605137299 | 0.20663969 | 3.41E-03 | 1.76E-02 | ENSMUSG000000021838 |
| Samhd1  | 0.407761446  | 0.16087996 | 1.13E-02 | 4.50E-02 | ENSMUSG000000027639 |
| Sar1a   | -0.472488821 | 0.12590104 | 1.75E-04 | 1.58E-03 | ENSMUSG000000020088 |
| Sar1b   | -0.709989927 | 0.11832725 | 1.97E-09 | 8.16E-08 | ENSMUSG000000020386 |
| Sardh   | 1.273506799  | 0.26012821 | 9.80E-07 | 1.99E-05 | ENSMUSG000000009614 |
| Sars    | -0.429561157 | 0.12019014 | 3.52E-04 | 2.80E-03 | ENSMUSG000000068739 |
| Sat1    | -0.631863751 | 0.16831041 | 1.74E-04 | 1.57E-03 | ENSMUSG000000025283 |

|          |              |            |          |          |                    |
|----------|--------------|------------|----------|----------|--------------------|
| Sat2     | 1.392742317  | 0.30040784 | 3.55E-06 | 6.06E-05 | ENSMUSG00000069835 |
| Sav1     | -0.411325918 | 0.13463144 | 2.25E-03 | 1.26E-02 | ENSMUSG00000021067 |
| Sbf2     | -0.802463697 | 0.21118015 | 1.45E-04 | 1.35E-03 | ENSMUSG00000038371 |
| Sbno1    | -0.778736366 | 0.2545159  | 2.22E-03 | 1.24E-02 | ENSMUSG00000038095 |
| Scaf11   | -0.894441122 | 0.24235053 | 2.24E-04 | 1.93E-03 | ENSMUSG00000033228 |
| Scara3   | 0.644759427  | 0.18341197 | 4.39E-04 | 3.37E-03 | ENSMUSG00000034463 |
| Scara5   | 0.53936577   | 0.16130278 | 8.26E-04 | 5.68E-03 | ENSMUSG00000022032 |
| Scarb1   | -0.381835325 | 0.1318213  | 3.77E-03 | 1.90E-02 | ENSMUSG00000037936 |
| Scarf2   | 1.079293865  | 0.19935198 | 6.16E-08 | 1.73E-06 | ENSMUSG00000012017 |
| Scd2     | 0.384879492  | 0.13738202 | 5.09E-03 | 2.43E-02 | ENSMUSG00000025203 |
| Scfd1    | -0.771017826 | 0.26192803 | 3.24E-03 | 1.69E-02 | ENSMUSG00000020952 |
| Scmh1    | -0.565024421 | 0.13228277 | 1.94E-05 | 2.58E-04 | ENSMUSG00000000085 |
| Scn1b    | 0.615557469  | 0.13651176 | 6.51E-06 | 1.01E-04 | ENSMUSG00000019194 |
| Sco1     | -0.898952457 | 0.33412942 | 7.14E-03 | 3.17E-02 | ENSMUSG00000069844 |
| Scoc     | -0.766959033 | 0.16287882 | 2.49E-06 | 4.47E-05 | ENSMUSG00000063253 |
| Scrg1    | 0.908968152  | 0.1081767  | 4.37E-17 | 5.99E-15 | ENSMUSG00000031610 |
| Scrn1    | 1.304319052  | 0.33953629 | 1.22E-04 | 1.18E-03 | ENSMUSG00000019124 |
| Scube1   | 1.035386656  | 0.2783832  | 2.00E-04 | 1.76E-03 | ENSMUSG00000016763 |
| Scyl2    | -0.887309725 | 0.32342415 | 6.08E-03 | 2.79E-02 | ENSMUSG00000069539 |
| Sdad1    | -1.033862472 | 0.23490879 | 1.08E-05 | 1.55E-04 | ENSMUSG00000029415 |
| Sdc1     | 0.479850606  | 0.12541184 | 1.30E-04 | 1.24E-03 | ENSMUSG00000020592 |
| Sdc3     | 0.931394098  | 0.17121231 | 5.33E-08 | 1.52E-06 | ENSMUSG00000025743 |
| Sdcbp    | -0.452401277 | 0.12085993 | 1.82E-04 | 1.63E-03 | ENSMUSG00000028249 |
| Sde2     | -0.43824252  | 0.17623004 | 1.29E-02 | 5.00E-02 | ENSMUSG00000038806 |
| Sdf4     | 0.327579372  | 0.11033972 | 2.99E-03 | 1.58E-02 | ENSMUSG00000029076 |
| Sdhaf4   | 0.577012477  | 0.14617466 | 7.90E-05 | 8.33E-04 | ENSMUSG00000026154 |
| Sdhc     | 0.560418276  | 0.13652753 | 4.05E-05 | 4.79E-04 | ENSMUSG00000058076 |
| Sdr39u1  | 0.878666254  | 0.19092026 | 4.18E-06 | 6.95E-05 | ENSMUSG00000022223 |
| Sdr42e1  | 1.901151531  | 0.48280333 | 8.23E-05 | 8.57E-04 | ENSMUSG00000034308 |
| Sec11c   | 0.435358494  | 0.14336668 | 2.39E-03 | 1.32E-02 | ENSMUSG00000024516 |
| Sec14l1  | 0.420933141  | 0.1556523  | 6.84E-03 | 3.07E-02 | ENSMUSG00000020823 |
| Sec22b   | -0.592528475 | 0.10737244 | 3.42E-08 | 1.04E-06 | ENSMUSG00000027879 |
| Sec23a   | -0.557237809 | 0.14728936 | 1.55E-04 | 1.43E-03 | ENSMUSG00000020986 |
| Sec23ip  | -0.55124814  | 0.19791266 | 5.35E-03 | 2.53E-02 | ENSMUSG00000055319 |
| Sec24a   | -0.872726212 | 0.20538842 | 2.15E-05 | 2.79E-04 | ENSMUSG00000036391 |
| Sec62    | -1.088949651 | 0.32450814 | 7.92E-04 | 5.50E-03 | ENSMUSG00000027706 |
| Sec63    | -0.63545383  | 0.22386391 | 4.53E-03 | 2.21E-02 | ENSMUSG00000019802 |
| Selenbp1 | 1.540333254  | 0.28143506 | 4.42E-08 | 1.30E-06 | ENSMUSG00000068874 |
| Selenom  | 0.496409588  | 0.11982791 | 3.43E-05 | 4.15E-04 | ENSMUSG00000075702 |
| Selenon  | 0.577025804  | 0.16561721 | 4.94E-04 | 3.71E-03 | ENSMUSG00000050989 |
| Sem1     | 0.304244439  | 0.11499156 | 8.15E-03 | 3.50E-02 | ENSMUSG00000042541 |
| Sema4b   | 0.912959847  | 0.22933245 | 6.86E-05 | 7.44E-04 | ENSMUSG00000030539 |
| Sema7a   | 1.465756002  | 0.21910689 | 2.24E-11 | 1.48E-09 | ENSMUSG00000038264 |

|           |              |            |          |          |                     |
|-----------|--------------|------------|----------|----------|---------------------|
| Senp5     | -0.86762482  | 0.25485375 | 6.63E-04 | 4.73E-03 | ENSMUSG00000022772  |
| Sept1     | 0.974869188  | 0.31220247 | 1.79E-03 | 1.05E-02 | ENSMUSG00000000486  |
| Sept7     | -0.971061698 | 0.18378912 | 1.27E-07 | 3.28E-06 | ENSMUSG00000001833  |
| Sept8     | 0.272300146  | 0.10530949 | 9.72E-03 | 4.03E-02 | ENSMUSG00000018398  |
| Sept9     | 0.812475878  | 0.29883361 | 6.55E-03 | 2.96E-02 | ENSMUSG000000059248 |
| Serbp1    | -0.494105875 | 0.10021906 | 8.21E-07 | 1.71E-05 | ENSMUSG000000036371 |
| Serhl     | 0.826307093  | 0.18954213 | 1.30E-05 | 1.83E-04 | ENSMUSG000000058586 |
| Serinc1   | -0.441266587 | 0.14060758 | 1.70E-03 | 1.01E-02 | ENSMUSG00000019877  |
| Serp1     | -0.497710195 | 0.10298179 | 1.34E-06 | 2.62E-05 | ENSMUSG000000027808 |
| Serpina12 | 2.637114661  | 0.37121323 | 1.21E-12 | 9.55E-11 | ENSMUSG000000041567 |
| Serpina3m | -0.780831652 | 0.11661678 | 2.15E-11 | 1.43E-09 | ENSMUSG000000079012 |
| Serpina3n | -0.435521163 | 0.12844497 | 6.97E-04 | 4.93E-03 | ENSMUSG000000021091 |
| Serpinf1  | 0.398622707  | 0.12098362 | 9.85E-04 | 6.52E-03 | ENSMUSG000000000753 |
| Serpinh1  | 0.691206747  | 0.09756268 | 1.39E-12 | 1.07E-10 | ENSMUSG000000070436 |
| Sertad3   | 1.170187297  | 0.2502299  | 2.92E-06 | 5.10E-05 | ENSMUSG000000055200 |
| Sertad4   | 0.879910892  | 0.17531696 | 5.19E-07 | 1.13E-05 | ENSMUSG000000016262 |
| Setd1b    | 0.679206657  | 0.17470916 | 1.01E-04 | 1.01E-03 | ENSMUSG000000038384 |
| Setd2     | -0.879473535 | 0.23971808 | 2.44E-04 | 2.08E-03 | ENSMUSG000000044791 |
| Setd5     | -0.607659788 | 0.19004283 | 1.39E-03 | 8.56E-03 | ENSMUSG000000034269 |
| Setx      | -1.329363644 | 0.42466546 | 1.75E-03 | 1.03E-02 | ENSMUSG000000043535 |
| Sez6      | -0.602292829 | 0.19555104 | 2.07E-03 | 1.18E-02 | ENSMUSG000000000632 |
| Sf3b1     | -0.882619654 | 0.19655417 | 7.11E-06 | 1.09E-04 | ENSMUSG000000025982 |
| Sf3b5     | -0.315348522 | 0.10843413 | 3.64E-03 | 1.85E-02 | ENSMUSG000000078348 |
| Sfr1      | -0.473802151 | 0.11857775 | 6.45E-05 | 7.10E-04 | ENSMUSG000000025066 |
| Sfrp5     | 1.29678053   | 0.5040886  | 1.01E-02 | 4.15E-02 | ENSMUSG000000018822 |
| Sft2d3    | 0.76108168   | 0.24449599 | 1.85E-03 | 1.08E-02 | ENSMUSG000000044982 |
| Sfxn2     | 0.877882212  | 0.32751306 | 7.35E-03 | 3.25E-02 | ENSMUSG000000025036 |
| Sfxn3     | 0.583603115  | 0.16045251 | 2.76E-04 | 2.30E-03 | ENSMUSG000000025212 |
| Sfxn4     | 2.288342785  | 0.73079432 | 1.74E-03 | 1.03E-02 | ENSMUSG000000063698 |
| Sgk1      | -0.71895072  | 0.11144609 | 1.11E-10 | 6.25E-09 | ENSMUSG000000019970 |
| Sgsh      | 1.664843703  | 0.37347953 | 8.29E-06 | 1.24E-04 | ENSMUSG000000005043 |
| Sh2b2     | 1.000002907  | 0.27301839 | 2.50E-04 | 2.11E-03 | ENSMUSG000000005057 |
| Sh3bgrl   | -1.107098755 | 0.44008158 | 1.19E-02 | 4.70E-02 | ENSMUSG000000031246 |
| Sh3bp1    | 0.769584353  | 0.22893974 | 7.75E-04 | 5.41E-03 | ENSMUSG000000022436 |
| Sh3bp4    | 1.363254733  | 0.2002334  | 9.87E-12 | 6.91E-10 | ENSMUSG000000036206 |
| Sh3bp5    | 0.606433287  | 0.22676982 | 7.49E-03 | 3.29E-02 | ENSMUSG000000021892 |
| Sh3bp5l   | 0.699224254  | 0.18759935 | 1.94E-04 | 1.72E-03 | ENSMUSG000000013646 |
| Sh3gl1    | 0.547745079  | 0.1561953  | 4.54E-04 | 3.46E-03 | ENSMUSG000000003200 |
| Sh3glb1   | -0.73272548  | 0.14193352 | 2.44E-07 | 5.75E-06 | ENSMUSG000000037062 |
| Sh3pxd2a  | 0.301872586  | 0.10929864 | 5.75E-03 | 2.67E-02 | ENSMUSG000000053617 |
| Sh3pxd2b  | 1.018139461  | 0.16587779 | 8.36E-10 | 3.86E-08 | ENSMUSG000000040711 |
| Shank1    | 0.671626433  | 0.21007333 | 1.39E-03 | 8.57E-03 | ENSMUSG000000038738 |
| Sharpin   | 0.464900074  | 0.18539899 | 1.22E-02 | 4.78E-02 | ENSMUSG000000022552 |



|          |              |            |          |          |                    |
|----------|--------------|------------|----------|----------|--------------------|
| Shc1     | 0.687886442  | 0.15483034 | 8.88E-06 | 1.31E-04 | ENSMUSG00000042626 |
| Shc2     | 0.726815409  | 0.28695215 | 1.13E-02 | 4.52E-02 | ENSMUSG00000020312 |
| Shisa4   | 0.791776214  | 0.15565415 | 3.64E-07 | 8.27E-06 | ENSMUSG00000041889 |
| Shld1    | 0.770573084  | 0.27983033 | 5.89E-03 | 2.72E-02 | ENSMUSG00000044991 |
| Shroom3  | 1.229772874  | 0.41497957 | 3.04E-03 | 1.60E-02 | ENSMUSG00000029381 |
| Siae     | 1.005134196  | 0.21281656 | 2.32E-06 | 4.23E-05 | ENSMUSG00000001942 |
| Sigmar1  | 0.445548016  | 0.13768755 | 1.21E-03 | 7.76E-03 | ENSMUSG00000036078 |
| Sin3b    | 0.312961687  | 0.10964908 | 4.31E-03 | 2.13E-02 | ENSMUSG00000031622 |
| Sirpa    | 0.550708877  | 0.19611772 | 4.98E-03 | 2.39E-02 | ENSMUSG00000037902 |
| Sirt2    | 0.42569648   | 0.1395728  | 2.29E-03 | 1.28E-02 | ENSMUSG00000015149 |
| Six1     | 0.623883814  | 0.18943847 | 9.90E-04 | 6.55E-03 | ENSMUSG00000051367 |
| Skil     | -1.046151587 | 0.2505     | 2.96E-05 | 3.67E-04 | ENSMUSG00000027660 |
| Skiv2l   | 1.295260139  | 0.18577411 | 3.12E-12 | 2.35E-10 | ENSMUSG00000040356 |
| Slain2   | -0.921911679 | 0.17977857 | 2.93E-07 | 6.77E-06 | ENSMUSG00000036087 |
| Slc10a3  | 1.059131244  | 0.24929413 | 2.15E-05 | 2.79E-04 | ENSMUSG00000032806 |
| Slc10a6  | -1.17189289  | 0.25373003 | 3.86E-06 | 6.51E-05 | ENSMUSG00000029321 |
| Slc11a2  | -0.460080116 | 0.17333264 | 7.95E-03 | 3.44E-02 | ENSMUSG00000023030 |
| Slc12a4  | 0.358737822  | 0.13058171 | 6.01E-03 | 2.76E-02 | ENSMUSG00000017765 |
| Slc13a5  | 3.388839725  | 0.28992467 | 1.46E-31 | 8.71E-29 | ENSMUSG00000020805 |
| Slc16a3  | 1.007811021  | 0.11722767 | 8.18E-18 | 1.20E-15 | ENSMUSG00000025161 |
| Slc1a5   | 0.630317662  | 0.11688787 | 6.95E-08 | 1.93E-06 | ENSMUSG00000001918 |
| Slc22a17 | 0.674016603  | 0.24203893 | 5.36E-03 | 2.53E-02 | ENSMUSG00000022199 |
| Slc22a18 | 2.148545422  | 0.7494868  | 4.15E-03 | 2.06E-02 | ENSMUSG00000000154 |
| Slc22a4  | -2.381078482 | 0.47538736 | 5.48E-07 | 1.19E-05 | ENSMUSG00000020334 |
| Slc25a1  | 0.401552928  | 0.14946974 | 7.22E-03 | 3.21E-02 | ENSMUSG00000003528 |
| Slc25a10 | 0.977732532  | 0.29647308 | 9.74E-04 | 6.48E-03 | ENSMUSG00000025792 |
| Slc25a11 | 0.590592867  | 0.13949142 | 2.30E-05 | 2.96E-04 | ENSMUSG00000014606 |
| Slc25a13 | 1.036724327  | 0.39562027 | 8.78E-03 | 3.72E-02 | ENSMUSG00000015112 |
| Slc25a20 | 0.429634473  | 0.15531762 | 5.67E-03 | 2.64E-02 | ENSMUSG00000032602 |
| Slc25a22 | 0.55783303   | 0.22274534 | 1.23E-02 | 4.81E-02 | ENSMUSG00000019082 |
| Slc25a3  | 0.579825959  | 0.1059578  | 4.44E-08 | 1.31E-06 | ENSMUSG00000061904 |
| Slc25a30 | -1.120243366 | 0.14090152 | 1.86E-15 | 2.13E-13 | ENSMUSG00000022003 |
| Slc25a33 | -0.640780814 | 0.17801758 | 3.19E-04 | 2.59E-03 | ENSMUSG00000028982 |
| Slc25a35 | 1.763898817  | 0.55265139 | 1.41E-03 | 8.70E-03 | ENSMUSG00000018740 |
| Slc25a36 | -0.604037258 | 0.23204261 | 9.24E-03 | 3.87E-02 | ENSMUSG00000032449 |
| Slc25a37 | -1.305426774 | 0.13904606 | 6.09E-21 | 1.25E-18 | ENSMUSG00000034248 |
| Slc25a45 | 1.46581049   | 0.33424846 | 1.16E-05 | 1.65E-04 | ENSMUSG00000024818 |
| Slc25a46 | -0.734458201 | 0.19274047 | 1.39E-04 | 1.31E-03 | ENSMUSG00000024259 |
| Slc27a4  | 0.825747506  | 0.213609   | 1.11E-04 | 1.08E-03 | ENSMUSG00000059316 |
| Slc29a1  | 0.840613004  | 0.11499326 | 2.67E-13 | 2.39E-11 | ENSMUSG00000023942 |
| Slc29a3  | 0.510396605  | 0.19375489 | 8.43E-03 | 3.60E-02 | ENSMUSG00000020100 |
| Slc2a13  | 1.737388997  | 0.48519168 | 3.43E-04 | 2.74E-03 | ENSMUSG00000036298 |
| Slc2a4   | 1.388045065  | 0.51088363 | 6.59E-03 | 2.97E-02 | ENSMUSG00000018566 |

|          |              |            |          |          |                    |
|----------|--------------|------------|----------|----------|--------------------|
| Slc2a8   | 0.589511444  | 0.16421405 | 3.31E-04 | 2.67E-03 | ENSMUSG00000026791 |
| Slc30a4  | -0.800044811 | 0.24188049 | 9.41E-04 | 6.32E-03 | ENSMUSG00000005802 |
| Slc30a9  | -0.482952417 | 0.18228421 | 8.06E-03 | 3.48E-02 | ENSMUSG00000029221 |
| Slc35a2  | 0.87888894   | 0.15022095 | 4.90E-09 | 1.85E-07 | ENSMUSG00000031156 |
| Slc35b2  | 0.653405926  | 0.12561176 | 1.97E-07 | 4.80E-06 | ENSMUSG00000037089 |
| Slc35b4  | 0.853319548  | 0.19420736 | 1.11E-05 | 1.59E-04 | ENSMUSG00000018999 |
| Slc36a1  | 0.769212083  | 0.2572275  | 2.79E-03 | 1.50E-02 | ENSMUSG00000020261 |
| Slc37a4  | 0.778540237  | 0.29322627 | 7.93E-03 | 3.44E-02 | ENSMUSG00000032114 |
| Slc38a10 | 0.464180363  | 0.11074521 | 2.77E-05 | 3.46E-04 | ENSMUSG00000061306 |
| Slc38a2  | -0.575430894 | 0.11714672 | 9.01E-07 | 1.85E-05 | ENSMUSG00000022462 |
| Slc38a3  | 0.977015826  | 0.29739279 | 1.02E-03 | 6.70E-03 | ENSMUSG00000010064 |
| Slc38a4  | 1.149907538  | 0.28607604 | 5.83E-05 | 6.50E-04 | ENSMUSG00000022464 |
| Slc39a1  | 0.594110067  | 0.14860007 | 6.39E-05 | 7.05E-04 | ENSMUSG00000052310 |
| Slc39a13 | 0.772106787  | 0.16598833 | 3.29E-06 | 5.68E-05 | ENSMUSG00000002105 |
| Slc39a8  | -1.436666185 | 0.39518798 | 2.78E-04 | 2.31E-03 | ENSMUSG00000053897 |
| Slc3a2   | -0.370525003 | 0.11797459 | 1.69E-03 | 1.00E-02 | ENSMUSG00000010095 |
| Slc40a1  | -0.435756021 | 0.15966609 | 6.35E-03 | 2.89E-02 | ENSMUSG00000025993 |
| Slc44a2  | 0.448845927  | 0.13480578 | 8.70E-04 | 5.94E-03 | ENSMUSG00000057193 |
| Slc49a4  | 0.39793974   | 0.14746972 | 6.97E-03 | 3.12E-02 | ENSMUSG00000022848 |
| Slc4a2   | 1.347928644  | 0.25080399 | 7.68E-08 | 2.12E-06 | ENSMUSG00000028962 |
| Slc4a7   | -1.52338876  | 0.24606167 | 5.98E-10 | 2.88E-08 | ENSMUSG00000021733 |
| Slc50a1  | 0.507500183  | 0.18992537 | 7.54E-03 | 3.31E-02 | ENSMUSG00000027953 |
| Slc6a6   | 1.084667619  | 0.19980616 | 5.68E-08 | 1.61E-06 | ENSMUSG00000030096 |
| Slc7a11  | -1.563545955 | 0.25648673 | 1.09E-09 | 4.79E-08 | ENSMUSG00000027737 |
| Slc7a8   | 1.6599332    | 0.60147405 | 5.78E-03 | 2.69E-02 | ENSMUSG00000022180 |
| Slc8a3   | 2.436045455  | 0.45922381 | 1.13E-07 | 2.94E-06 | ENSMUSG00000079055 |
| Slc9a1   | 0.600770233  | 0.22831669 | 8.51E-03 | 3.62E-02 | ENSMUSG00000028854 |
| Slc9a9   | 1.376092548  | 0.41785898 | 9.91E-04 | 6.55E-03 | ENSMUSG00000031129 |
| Slco4a1  | 1.310355593  | 0.36717399 | 3.59E-04 | 2.85E-03 | ENSMUSG00000038963 |
| Slf2     | -0.916457294 | 0.28812083 | 1.47E-03 | 8.96E-03 | ENSMUSG00000036097 |
| Slfn2    | -0.877705344 | 0.33956693 | 9.74E-03 | 4.03E-02 | ENSMUSG00000072620 |
| Slit3    | 0.766601133  | 0.25343228 | 2.49E-03 | 1.37E-02 | ENSMUSG00000056427 |
| Slpi     | -0.95961713  | 0.11608697 | 1.38E-16 | 1.78E-14 | ENSMUSG00000017002 |
| Sltm     | -1.082954495 | 0.25258906 | 1.81E-05 | 2.41E-04 | ENSMUSG00000032212 |
| Slu7     | -0.818310865 | 0.24012847 | 6.55E-04 | 4.68E-03 | ENSMUSG00000020409 |
| Slx1b    | 1.005243279  | 0.2851789  | 4.24E-04 | 3.28E-03 | ENSMUSG00000059772 |
| Smad3    | 0.571794593  | 0.13831828 | 3.57E-05 | 4.28E-04 | ENSMUSG00000032402 |
| Smad4    | -0.465810125 | 0.15595118 | 2.82E-03 | 1.51E-02 | ENSMUSG00000024515 |
| Smad6    | 1.119573409  | 0.25345111 | 9.99E-06 | 1.45E-04 | ENSMUSG00000036867 |
| Smap1    | -0.489721202 | 0.15838826 | 1.99E-03 | 1.14E-02 | ENSMUSG00000026155 |
| Smarca2  | -0.565009523 | 0.21960079 | 1.01E-02 | 4.14E-02 | ENSMUSG00000024921 |
| Smarca5  | -0.825115095 | 0.24945436 | 9.41E-04 | 6.32E-03 | ENSMUSG00000031715 |
| Smarcc1  | -0.882874834 | 0.22807177 | 1.08E-04 | 1.06E-03 | ENSMUSG00000032481 |

|          |              |            |          |          |                    |
|----------|--------------|------------|----------|----------|--------------------|
| Smarcc2  | 1.035208164  | 0.16010964 | 1.01E-10 | 5.80E-09 | ENSMUSG00000025369 |
| Smarcd3  | 1.449781277  | 0.1813439  | 1.30E-15 | 1.53E-13 | ENSMUSG00000028949 |
| Smc1a    | -0.789334231 | 0.21570281 | 2.53E-04 | 2.13E-03 | ENSMUSG00000041133 |
| Smc2     | -1.105268329 | 0.43920041 | 1.19E-02 | 4.70E-02 | ENSMUSG00000028312 |
| Smc3     | -0.91595101  | 0.28314442 | 1.22E-03 | 7.78E-03 | ENSMUSG00000024974 |
| Smc4     | -1.04503155  | 0.25534467 | 4.27E-05 | 5.02E-04 | ENSMUSG00000034349 |
| Smc5     | -1.7323778   | 0.39144695 | 9.62E-06 | 1.40E-04 | ENSMUSG00000024943 |
| Smc6     | -1.174445385 | 0.44409842 | 8.18E-03 | 3.51E-02 | ENSMUSG00000020608 |
| Smg1     | -1.199909996 | 0.28556391 | 2.65E-05 | 3.33E-04 | ENSMUSG00000030655 |
| Smim1    | 0.933762425  | 0.14364481 | 8.01E-11 | 4.70E-09 | ENSMUSG00000078350 |
| Smim10I1 | -0.484127553 | 0.15988867 | 2.46E-03 | 1.36E-02 | ENSMUSG00000072704 |
| Smim12   | 0.423056709  | 0.14956547 | 4.68E-03 | 2.27E-02 | ENSMUSG00000042380 |
| Smim14   | 0.342422552  | 0.100337   | 6.43E-04 | 4.62E-03 | ENSMUSG00000037822 |
| Smim19   | 0.446181274  | 0.16282493 | 6.14E-03 | 2.81E-02 | ENSMUSG00000031534 |
| Smim26   | -0.383967893 | 0.14513568 | 8.16E-03 | 3.50E-02 | ENSMUSG00000074754 |
| Smim27   | 0.726992491  | 0.15700316 | 3.65E-06 | 6.21E-05 | ENSMUSG00000028407 |
| Smim4    | 0.859674074  | 0.14430343 | 2.56E-09 | 1.04E-07 | ENSMUSG00000058351 |
| Smim5    | 3.341570327  | 0.34079615 | 1.07E-22 | 2.93E-20 | ENSMUSG00000048442 |
| Smndc1   | -0.688376955 | 0.15379893 | 7.61E-06 | 1.15E-04 | ENSMUSG00000025024 |
| Smo      | 0.559072562  | 0.19533659 | 4.21E-03 | 2.08E-02 | ENSMUSG00000001761 |
| Smoc1    | 1.31592565   | 0.23129167 | 1.27E-08 | 4.44E-07 | ENSMUSG00000021136 |
| Smox     | -0.57358204  | 0.14603055 | 8.57E-05 | 8.85E-04 | ENSMUSG00000027333 |
| Smpd1    | 0.567489751  | 0.15109401 | 1.73E-04 | 1.56E-03 | ENSMUSG00000037049 |
| Smpd2    | 0.97869633   | 0.18544733 | 1.31E-07 | 3.37E-06 | ENSMUSG00000019822 |
| Smpd3    | 2.29901889   | 0.14710055 | 4.63E-55 | 1.22E-51 | ENSMUSG00000031906 |
| Sms      | -0.937050506 | 0.36764279 | 1.08E-02 | 4.37E-02 | ENSMUSG00000071708 |
| Smtn     | 0.782709838  | 0.13825868 | 1.50E-08 | 5.06E-07 | ENSMUSG00000020439 |
| Smu1     | -0.321107693 | 0.12435202 | 9.82E-03 | 4.06E-02 | ENSMUSG00000028409 |
| Snai1    | 1.286607615  | 0.13578135 | 2.65E-21 | 5.72E-19 | ENSMUSG00000042821 |
| Snap23   | -0.848195506 | 0.17591236 | 1.42E-06 | 2.75E-05 | ENSMUSG00000027287 |
| Snap47   | 0.864696201  | 0.10801513 | 1.19E-15 | 1.41E-13 | ENSMUSG00000009894 |
| Snpc3    | -0.624570506 | 0.2299321  | 6.60E-03 | 2.98E-02 | ENSMUSG00000028483 |
| Snpc5    | 0.797880481  | 0.19920622 | 6.19E-05 | 6.87E-04 | ENSMUSG00000032398 |
| Snpin    | 0.751273585  | 0.17697939 | 2.19E-05 | 2.83E-04 | ENSMUSG00000001018 |
| Sned1    | 1.176943124  | 0.21646868 | 5.42E-08 | 1.54E-06 | ENSMUSG00000047793 |
| Snhg1    | 1.83341581   | 0.41079853 | 8.08E-06 | 1.21E-04 | ENSMUSG00000107994 |
| Snhg11   | -1.475571093 | 0.45813715 | 1.28E-03 | 8.07E-03 | ENSMUSG00000044349 |
| Snhg12   | -1.320000006 | 0.1428115  | 2.40E-20 | 4.57E-18 | ENSMUSG00000086290 |
| Snhg14   | -0.573917326 | 0.138209   | 3.29E-05 | 4.03E-04 | ENSMUSG00000100215 |
| Snhg15   | -1.277160242 | 0.15263396 | 5.89E-17 | 7.91E-15 | ENSMUSG00000085156 |
| Snhg5    | 1.17990649   | 0.30190285 | 9.30E-05 | 9.50E-04 | ENSMUSG00000097180 |
| Snhg8    | -2.096868188 | 0.77820187 | 7.05E-03 | 3.14E-02 | ENSMUSG00000104876 |
| Snrnp48  | -1.649483731 | 0.20751907 | 1.89E-15 | 2.14E-13 | ENSMUSG00000021431 |

|         |              |            |          |          |                     |
|---------|--------------|------------|----------|----------|---------------------|
| Snrpa1  | -1.082864478 | 0.16745819 | 1.00E-10 | 5.79E-09 | ENSMUSG00000030512  |
| Snrpb2  | -0.344147456 | 0.11122555 | 1.97E-03 | 1.13E-02 | ENSMUSG00000008333  |
| Snrpd1  | -0.365113286 | 0.1221899  | 2.81E-03 | 1.50E-02 | ENSMUSG00000002477  |
| Snrpd2  | -0.318358443 | 0.12700064 | 1.22E-02 | 4.79E-02 | ENSMUSG00000040824  |
| Snrpd3  | -0.478668171 | 0.13038558 | 2.41E-04 | 2.06E-03 | ENSMUSG00000020180  |
| Snrpg   | -0.491181354 | 0.16840105 | 3.54E-03 | 1.81E-02 | ENSMUSG000000057278 |
| Snta1   | 0.99267688   | 0.13028661 | 2.55E-14 | 2.47E-12 | ENSMUSG00000027488  |
| Snw1    | -0.770881105 | 0.14979718 | 2.66E-07 | 6.24E-06 | ENSMUSG00000021039  |
| Snx10   | -1.08128463  | 0.28574802 | 1.54E-04 | 1.42E-03 | ENSMUSG00000038301  |
| Snx16   | -1.002300656 | 0.27364608 | 2.50E-04 | 2.11E-03 | ENSMUSG00000027534  |
| Snx18   | -0.666009159 | 0.15514228 | 1.76E-05 | 2.37E-04 | ENSMUSG00000042364  |
| Snx32   | 1.022172842  | 0.34131787 | 2.75E-03 | 1.48E-02 | ENSMUSG00000056185  |
| Snx33   | 0.5501379    | 0.17833347 | 2.04E-03 | 1.16E-02 | ENSMUSG00000032733  |
| Snx5    | -0.397986927 | 0.14492994 | 6.03E-03 | 2.77E-02 | ENSMUSG00000027423  |
| Snx7    | 0.668801566  | 0.25577231 | 8.93E-03 | 3.77E-02 | ENSMUSG00000028007  |
| Snx8    | 0.378415455  | 0.14604193 | 9.57E-03 | 3.98E-02 | ENSMUSG00000029560  |
| Socs2   | -0.820821396 | 0.16094605 | 3.40E-07 | 7.76E-06 | ENSMUSG00000020027  |
| Socs4   | -1.18879348  | 0.28370848 | 2.79E-05 | 3.48E-04 | ENSMUSG00000048379  |
| Sod3    | 0.497081013  | 0.18061221 | 5.92E-03 | 2.73E-02 | ENSMUSG00000072941  |
| Son     | -0.398889972 | 0.13734753 | 3.68E-03 | 1.87E-02 | ENSMUSG00000022961  |
| Sort1   | 0.805601538  | 0.22326949 | 3.08E-04 | 2.52E-03 | ENSMUSG00000068747  |
| Sos1    | -0.997929087 | 0.37485293 | 7.76E-03 | 3.38E-02 | ENSMUSG00000024241  |
| Sowahc  | 2.28819436   | 0.61612325 | 2.04E-04 | 1.79E-03 | ENSMUSG00000097993  |
| Sox11   | -2.225946976 | 0.83878448 | 7.96E-03 | 3.45E-02 | ENSMUSG00000063632  |
| Sox4    | -0.822537832 | 0.14061446 | 4.93E-09 | 1.86E-07 | ENSMUSG00000076431  |
| Sp3     | -0.967904278 | 0.27688154 | 4.73E-04 | 3.58E-03 | ENSMUSG00000027109  |
| Sp3os   | 0.838523048  | 0.23310992 | 3.22E-04 | 2.62E-03 | ENSMUSG00000063714  |
| Sp7     | 3.158145914  | 0.23483849 | 3.16E-41 | 4.62E-38 | ENSMUSG00000060284  |
| Spa17   | 0.858932971  | 0.22577068 | 1.42E-04 | 1.33E-03 | ENSMUSG00000001948  |
| Spag9   | -0.91196375  | 0.26464285 | 5.69E-04 | 4.17E-03 | ENSMUSG00000020859  |
| Sparc   | 0.471709921  | 0.09483655 | 6.56E-07 | 1.39E-05 | ENSMUSG00000018593  |
| Spata13 | 0.743139187  | 0.24555113 | 2.47E-03 | 1.36E-02 | ENSMUSG00000021990  |
| Spata24 | 0.788667747  | 0.3032445  | 9.30E-03 | 3.88E-02 | ENSMUSG00000024352  |
| Spc24   | 0.963977763  | 0.36008889 | 7.43E-03 | 3.27E-02 | ENSMUSG00000074476  |
| Spc25   | -0.771602954 | 0.24736737 | 1.81E-03 | 1.06E-02 | ENSMUSG00000005233  |
| Spg7    | 0.438600063  | 0.15734277 | 5.31E-03 | 2.51E-02 | ENSMUSG00000000738  |
| Spice1  | -1.049422508 | 0.39155087 | 7.36E-03 | 3.25E-02 | ENSMUSG00000043065  |
| Spink10 | -0.670749998 | 0.2110908  | 1.49E-03 | 9.04E-03 | ENSMUSG00000044176  |
| Spns1   | 0.541720976  | 0.21138279 | 1.04E-02 | 4.24E-02 | ENSMUSG00000030741  |
| Spns2   | 2.359918114  | 0.30171939 | 5.22E-15 | 5.58E-13 | ENSMUSG00000040447  |
| Spock2  | 0.861081091  | 0.22072847 | 9.58E-05 | 9.71E-04 | ENSMUSG00000058297  |
| Spon1   | 0.652221048  | 0.25789511 | 1.14E-02 | 4.56E-02 | ENSMUSG00000038156  |
| Spop    | -0.452280162 | 0.14081952 | 1.32E-03 | 8.25E-03 | ENSMUSG00000057522  |

|         |              |            |          |          |                    |
|---------|--------------|------------|----------|----------|--------------------|
| Spopl   | -0.973125519 | 0.34814732 | 5.19E-03 | 2.46E-02 | ENSMUSG00000026771 |
| Spp1    | -0.823071491 | 0.14670688 | 2.02E-08 | 6.56E-07 | ENSMUSG00000029304 |
| Sppl2b  | 0.807453171  | 0.20533953 | 8.41E-05 | 8.72E-04 | ENSMUSG00000035206 |
| Sppl3   | 0.376236621  | 0.13704151 | 6.04E-03 | 2.78E-02 | ENSMUSG00000029550 |
| Spr     | 0.339438406  | 0.12679006 | 7.42E-03 | 3.27E-02 | ENSMUSG00000033735 |
| Spry1   | 1.009270646  | 0.25265738 | 6.48E-05 | 7.11E-04 | ENSMUSG00000037211 |
| Spsb2   | 0.536603178  | 0.18249824 | 3.28E-03 | 1.70E-02 | ENSMUSG00000038451 |
| Sptbn1  | -0.514975438 | 0.1526901  | 7.44E-04 | 5.23E-03 | ENSMUSG00000020315 |
| Sptlc1  | 0.453719481  | 0.17537046 | 9.68E-03 | 4.02E-02 | ENSMUSG00000021468 |
| Sptlc2  | -0.616443711 | 0.18459694 | 8.40E-04 | 5.77E-03 | ENSMUSG00000021036 |
| Sptssa  | 0.547248686  | 0.21354655 | 1.04E-02 | 4.24E-02 | ENSMUSG00000044408 |
| Spty2d1 | -0.754399673 | 0.26539872 | 4.48E-03 | 2.19E-02 | ENSMUSG00000049516 |
| Sqstm1  | -0.278834386 | 0.10501763 | 7.93E-03 | 3.44E-02 | ENSMUSG00000015837 |
| Sra1    | -0.438553603 | 0.11236702 | 9.51E-05 | 9.66E-04 | ENSMUSG00000006050 |
| Srd5a3  | 0.47196225   | 0.18559243 | 1.10E-02 | 4.43E-02 | ENSMUSG00000029233 |
| Srebf1  | 0.636908408  | 0.24848411 | 1.04E-02 | 4.24E-02 | ENSMUSG00000020538 |
| Srek1   | -0.796721051 | 0.25011136 | 1.45E-03 | 8.87E-03 | ENSMUSG00000032621 |
| Srfbp1  | -1.457231295 | 0.31474842 | 3.66E-06 | 6.22E-05 | ENSMUSG00000024528 |
| Srgap3  | -0.9726802   | 0.22469695 | 1.50E-05 | 2.06E-04 | ENSMUSG00000030257 |
| Srgn    | -0.560736027 | 0.22168498 | 1.14E-02 | 4.56E-02 | ENSMUSG00000020077 |
| Sri     | 0.369725345  | 0.11297631 | 1.07E-03 | 6.96E-03 | ENSMUSG00000003161 |
| Srm     | -0.343003713 | 0.11446894 | 2.73E-03 | 1.47E-02 | ENSMUSG00000006442 |
| Srp19   | -0.686813572 | 0.1086165  | 2.56E-10 | 1.34E-08 | ENSMUSG00000014504 |
| Srp72   | -0.747183427 | 0.15042881 | 6.80E-07 | 1.43E-05 | ENSMUSG00000036323 |
| Srp9    | -0.411710448 | 0.16517466 | 1.27E-02 | 4.94E-02 | ENSMUSG00000026511 |
| Srpk1   | -0.488143258 | 0.18243399 | 7.46E-03 | 3.28E-02 | ENSMUSG00000004865 |
| Srpk2   | -0.768273352 | 0.24325633 | 1.59E-03 | 9.53E-03 | ENSMUSG00000062604 |
| Srpr    | -0.614850666 | 0.20123496 | 2.25E-03 | 1.26E-02 | ENSMUSG00000032042 |
| Srpx    | 0.838618229  | 0.19638786 | 1.95E-05 | 2.59E-04 | ENSMUSG00000090084 |
| Srpx2   | 0.715740034  | 0.11491947 | 4.72E-10 | 2.34E-08 | ENSMUSG00000031253 |
| Srsf10  | -0.93083313  | 0.19612655 | 2.07E-06 | 3.84E-05 | ENSMUSG00000028676 |
| Srsf11  | -1.038433626 | 0.16999777 | 1.01E-09 | 4.49E-08 | ENSMUSG00000055436 |
| Srsf2   | 0.777402716  | 0.14041137 | 3.08E-08 | 9.53E-07 | ENSMUSG00000034120 |
| Srsf9   | 0.532971097  | 0.10934714 | 1.09E-06 | 2.18E-05 | ENSMUSG00000029538 |
| Srxn1   | -0.300489795 | 0.09969291 | 2.58E-03 | 1.41E-02 | ENSMUSG00000032802 |
| Ssb     | -1.052537781 | 0.39194733 | 7.24E-03 | 3.21E-02 | ENSMUSG00000068882 |
| Ssbp3   | 0.448682269  | 0.12593921 | 3.67E-04 | 2.90E-03 | ENSMUSG00000061887 |
| Ssbp4   | 0.427297168  | 0.14218251 | 2.65E-03 | 1.44E-02 | ENSMUSG00000070003 |
| Ssh2    | -0.645851305 | 0.14559698 | 9.17E-06 | 1.35E-04 | ENSMUSG00000037926 |
| Sspn    | 0.565979974  | 0.19903682 | 4.46E-03 | 2.18E-02 | ENSMUSG00000030255 |
| Ssr3    | -0.305442151 | 0.1097711  | 5.39E-03 | 2.54E-02 | ENSMUSG00000027828 |
| St13    | -0.344091994 | 0.11084993 | 1.91E-03 | 1.10E-02 | ENSMUSG00000022403 |
| St3gal1 | 0.405075058  | 0.13505993 | 2.71E-03 | 1.46E-02 | ENSMUSG00000013846 |

|            |              |            |          |          |                    |
|------------|--------------|------------|----------|----------|--------------------|
| St3gal2    | 0.514425791  | 0.15997942 | 1.30E-03 | 8.18E-03 | ENSMUSG00000031749 |
| St3gal5    | 1.121369339  | 0.27610475 | 4.88E-05 | 5.59E-04 | ENSMUSG00000056091 |
| St5        | 0.720359659  | 0.22619    | 1.45E-03 | 8.88E-03 | ENSMUSG00000031024 |
| St6galnac4 | 1.061902809  | 0.13297375 | 1.40E-15 | 1.63E-13 | ENSMUSG00000079442 |
| St6galnac6 | 0.388037729  | 0.15464644 | 1.21E-02 | 4.77E-02 | ENSMUSG00000026811 |
| St8sia2    | 1.89464104   | 0.33731953 | 1.95E-08 | 6.39E-07 | ENSMUSG00000025789 |
| Stab1      | 1.527754187  | 0.4962379  | 2.08E-03 | 1.18E-02 | ENSMUSG00000042286 |
| Stag2      | -0.841854346 | 0.22104786 | 1.40E-04 | 1.31E-03 | ENSMUSG00000025862 |
| Stam       | -0.823665195 | 0.2182912  | 1.61E-04 | 1.47E-03 | ENSMUSG00000026718 |
| Stard5     | -0.37856634  | 0.15100561 | 1.22E-02 | 4.79E-02 | ENSMUSG00000046027 |
| Stat1      | 1.066114536  | 0.31735954 | 7.81E-04 | 5.44E-03 | ENSMUSG00000026104 |
| Stat5a     | 0.917566991  | 0.29420188 | 1.82E-03 | 1.06E-02 | ENSMUSG00000004043 |
| Stat5b     | 0.7786034    | 0.22894734 | 6.72E-04 | 4.77E-03 | ENSMUSG00000020919 |
| Stat6      | 0.536722378  | 0.14704658 | 2.62E-04 | 2.20E-03 | ENSMUSG00000002147 |
| Stc2       | 0.95872359   | 0.21623992 | 9.27E-06 | 1.35E-04 | ENSMUSG00000020303 |
| Steap1     | -0.963965653 | 0.16314452 | 3.45E-09 | 1.35E-07 | ENSMUSG00000015652 |
| Steap2     | -1.027058579 | 0.27518617 | 1.90E-04 | 1.69E-03 | ENSMUSG00000015653 |
| Stim1      | 0.803418142  | 0.1675504  | 1.63E-06 | 3.11E-05 | ENSMUSG00000030987 |
| Stimate    | 0.453456994  | 0.17842888 | 1.10E-02 | 4.44E-02 | ENSMUSG00000006526 |
| Stip1      | -0.49462284  | 0.13401569 | 2.24E-04 | 1.93E-03 | ENSMUSG00000024966 |
| Stk25      | 0.615213017  | 0.15428034 | 6.67E-05 | 7.27E-04 | ENSMUSG00000026277 |
| Stk3       | -1.047722323 | 0.29244101 | 3.40E-04 | 2.73E-03 | ENSMUSG00000022329 |
| Stk39      | -0.770590564 | 0.26776397 | 4.00E-03 | 2.00E-02 | ENSMUSG00000027030 |
| Stk40      | 0.579417988  | 0.13840649 | 2.83E-05 | 3.53E-04 | ENSMUSG00000042608 |
| Strada     | 0.815709182  | 0.28297205 | 3.94E-03 | 1.98E-02 | ENSMUSG00000069631 |
| Strap      | -0.516294145 | 0.13987991 | 2.23E-04 | 1.93E-03 | ENSMUSG00000030224 |
| Strbp      | -0.849007631 | 0.21551402 | 8.17E-05 | 8.53E-04 | ENSMUSG00000026915 |
| Strn3      | -0.885945278 | 0.22863598 | 1.07E-04 | 1.05E-03 | ENSMUSG00000020954 |
| Stx12      | -0.503469228 | 0.15964482 | 1.61E-03 | 9.66E-03 | ENSMUSG00000028879 |
| Stx5a      | -0.375709129 | 0.14551647 | 9.83E-03 | 4.06E-02 | ENSMUSG00000010110 |
| Stx7       | -0.380870327 | 0.14372274 | 8.05E-03 | 3.47E-02 | ENSMUSG00000019998 |
| Stxbp2     | 0.997382481  | 0.25595912 | 9.75E-05 | 9.85E-04 | ENSMUSG00000004626 |
| Suc1g1     | 0.498514641  | 0.12688637 | 8.54E-05 | 8.83E-04 | ENSMUSG00000052738 |
| Suco       | -0.933466293 | 0.21963369 | 2.14E-05 | 2.78E-04 | ENSMUSG00000040297 |
| Sugct      | 1.012163604  | 0.31644878 | 1.38E-03 | 8.55E-03 | ENSMUSG00000055137 |
| Sugt1      | -0.520237668 | 0.13860934 | 1.75E-04 | 1.58E-03 | ENSMUSG00000022024 |
| Sulf2      | 0.385823189  | 0.12692529 | 2.37E-03 | 1.31E-02 | ENSMUSG00000006800 |
| Sult1a1    | 2.002849039  | 0.20060446 | 1.79E-23 | 5.61E-21 | ENSMUSG00000030711 |
| Sult5a1    | 1.299663676  | 0.1328947  | 1.38E-22 | 3.70E-20 | ENSMUSG00000000739 |
| Sumf1      | 0.510161234  | 0.19183929 | 7.83E-03 | 3.40E-02 | ENSMUSG00000030101 |
| Sun2       | 0.541143708  | 0.12000802 | 6.51E-06 | 1.01E-04 | ENSMUSG00000042524 |
| Susd5      | 1.14816965   | 0.24690022 | 3.31E-06 | 5.69E-05 | ENSMUSG00000086596 |
| Suz12      | -1.109529542 | 0.39004603 | 4.45E-03 | 2.18E-02 | ENSMUSG00000017548 |

|         |              |            |          |          |                    |
|---------|--------------|------------|----------|----------|--------------------|
| Svbp    | 0.506443183  | 0.14265578 | 3.85E-04 | 3.02E-03 | ENSMUSG00000028643 |
| Svep1   | 0.917552346  | 0.30138173 | 2.33E-03 | 1.30E-02 | ENSMUSG00000028369 |
| Swt1    | -1.278622144 | 0.27950036 | 4.77E-06 | 7.79E-05 | ENSMUSG00000052748 |
| Syncrip | -0.693441006 | 0.16726965 | 3.39E-05 | 4.12E-04 | ENSMUSG00000032423 |
| Syngr2  | 0.556798991  | 0.1444844  | 1.16E-04 | 1.13E-03 | ENSMUSG00000048277 |
| Synpo   | 0.399832262  | 0.13499536 | 3.06E-03 | 1.61E-02 | ENSMUSG00000043079 |
| Syt12   | 0.86766784   | 0.27251599 | 1.45E-03 | 8.89E-03 | ENSMUSG00000049303 |
| Syt3    | 2.061536463  | 0.5208501  | 7.56E-05 | 8.02E-04 | ENSMUSG00000030731 |
| Syt7    | -1.638934781 | 0.58058546 | 4.76E-03 | 2.30E-02 | ENSMUSG00000024743 |
| Syt8    | 2.030573366  | 0.428034   | 2.10E-06 | 3.86E-05 | ENSMUSG00000031098 |
| Syvn1   | 0.581286815  | 0.20210948 | 4.03E-03 | 2.00E-02 | ENSMUSG00000024807 |
| Tab2    | -0.711245606 | 0.19061079 | 1.90E-04 | 1.69E-03 | ENSMUSG00000015755 |
| Taco1os | 1.041247704  | 0.39484508 | 8.36E-03 | 3.58E-02 | ENSMUSG00000085255 |
| Taf1    | -0.820330348 | 0.30634522 | 7.41E-03 | 3.27E-02 | ENSMUSG00000031314 |
| Taf15   | -0.832699294 | 0.21777826 | 1.32E-04 | 1.25E-03 | ENSMUSG00000020680 |
| Taf1a   | -1.588233183 | 0.41894772 | 1.50E-04 | 1.39E-03 | ENSMUSG00000072258 |
| Taf1d   | -1.655103397 | 0.20508228 | 7.00E-16 | 8.46E-14 | ENSMUSG00000031939 |
| Taf6l   | 0.747530686  | 0.11644648 | 1.37E-10 | 7.53E-09 | ENSMUSG00000003680 |
| Tagln2  | 0.481469342  | 0.13028061 | 2.19E-04 | 1.90E-03 | ENSMUSG00000026547 |
| Taldo1  | -0.778407768 | 0.11201525 | 3.68E-12 | 2.73E-10 | ENSMUSG00000025503 |
| Tank    | -0.78808256  | 0.23684564 | 8.77E-04 | 5.97E-03 | ENSMUSG00000064289 |
| Taok1   | -0.649503149 | 0.19714076 | 9.86E-04 | 6.52E-03 | ENSMUSG00000017291 |
| Taok2   | 0.89217484   | 0.24305408 | 2.42E-04 | 2.06E-03 | ENSMUSG00000059981 |
| Tardbp  | -1.023934417 | 0.14909242 | 6.52E-12 | 4.64E-10 | ENSMUSG00000041459 |
| Tars    | -0.723225564 | 0.12966697 | 2.44E-08 | 7.76E-07 | ENSMUSG00000022241 |
| Tatdn1  | -0.840740929 | 0.21493909 | 9.17E-05 | 9.37E-04 | ENSMUSG00000050891 |
| Tax1bp1 | -1.14496295  | 0.20130004 | 1.29E-08 | 4.46E-07 | ENSMUSG00000004535 |
| Taz     | 0.554327522  | 0.19266421 | 4.01E-03 | 2.00E-02 | ENSMUSG00000009995 |
| Tbc1d15 | -1.548260881 | 0.17107966 | 1.43E-19 | 2.62E-17 | ENSMUSG00000020130 |
| Tbc1d23 | -1.212793545 | 0.33582351 | 3.05E-04 | 2.49E-03 | ENSMUSG00000022749 |
| Tbc1d31 | -1.698411071 | 0.51673782 | 1.01E-03 | 6.67E-03 | ENSMUSG00000022364 |
| Tbc1d7  | 0.786018961  | 0.24331746 | 1.24E-03 | 7.87E-03 | ENSMUSG00000021368 |
| Tbc1d9b | 0.618992564  | 0.13310791 | 3.31E-06 | 5.69E-05 | ENSMUSG00000036644 |
| Tbca    | -0.532747673 | 0.1242085  | 1.79E-05 | 2.40E-04 | ENSMUSG00000042043 |
| Tbcd    | 0.422247795  | 0.16077561 | 8.63E-03 | 3.67E-02 | ENSMUSG00000039230 |
| Tbl1x   | -0.388336968 | 0.15341389 | 1.14E-02 | 4.54E-02 | ENSMUSG00000025246 |
| Tbp1    | -0.787770458 | 0.14046582 | 2.04E-08 | 6.63E-07 | ENSMUSG00000071359 |
| Tbrg1   | -0.62179029  | 0.11166503 | 2.57E-08 | 8.12E-07 | ENSMUSG00000011114 |
| Tbx2    | 1.042835743  | 0.38015081 | 6.08E-03 | 2.79E-02 | ENSMUSG00000000093 |
| Tcaim   | -1.126034687 | 0.37651976 | 2.78E-03 | 1.49E-02 | ENSMUSG00000046603 |
| Tcea1   | -1.247650216 | 0.26858153 | 3.40E-06 | 5.82E-05 | ENSMUSG00000033813 |
| Tceal9  | -0.69997658  | 0.12231638 | 1.05E-08 | 3.72E-07 | ENSMUSG00000042712 |
| Tcerg1  | -1.44822234  | 0.25875873 | 2.18E-08 | 6.99E-07 | ENSMUSG00000024498 |

|         |              |            |          |          |                    |
|---------|--------------|------------|----------|----------|--------------------|
| Tcf19   | 0.889133425  | 0.24269434 | 2.49E-04 | 2.11E-03 | ENSMUSG00000050410 |
| Tcf25   | 0.405453249  | 0.10351197 | 8.97E-05 | 9.19E-04 | ENSMUSG00000001472 |
| Tcf7    | 1.136825955  | 0.3385383  | 7.85E-04 | 5.46E-03 | ENSMUSG00000000782 |
| Tcf7l1  | 0.798392492  | 0.1742087  | 4.58E-06 | 7.52E-05 | ENSMUSG00000055799 |
| Tcn2    | 0.612041918  | 0.14800548 | 3.55E-05 | 4.26E-04 | ENSMUSG00000020432 |
| Tcp1    | -0.538164521 | 0.13135098 | 4.18E-05 | 4.94E-04 | ENSMUSG00000068039 |
| Tcta    | 0.482529245  | 0.18904501 | 1.07E-02 | 4.34E-02 | ENSMUSG00000039461 |
| Tctn2   | 0.923330904  | 0.35486265 | 9.27E-03 | 3.88E-02 | ENSMUSG00000029386 |
| Tdp2    | -1.012921138 | 0.29611885 | 6.25E-04 | 4.50E-03 | ENSMUSG00000035958 |
| Tead1   | -0.755443217 | 0.21623717 | 4.77E-04 | 3.60E-03 | ENSMUSG00000055320 |
| Tecr    | 0.489790537  | 0.12957582 | 1.57E-04 | 1.44E-03 | ENSMUSG00000031708 |
| Tent4b  | -1.586434246 | 0.42808759 | 2.11E-04 | 1.84E-03 | ENSMUSG00000036779 |
| Tent5c  | 1.859307603  | 0.31811283 | 5.07E-09 | 1.91E-07 | ENSMUSG00000044468 |
| Tex261  | 0.646264073  | 0.12391827 | 1.84E-07 | 4.50E-06 | ENSMUSG00000014748 |
| Tex264  | 0.471746118  | 0.14663062 | 1.29E-03 | 8.15E-03 | ENSMUSG00000040813 |
| Tex30   | -0.770757628 | 0.28866587 | 7.58E-03 | 3.32E-02 | ENSMUSG00000026049 |
| Tfip11  | 0.5385594    | 0.163356   | 9.78E-04 | 6.50E-03 | ENSMUSG00000029345 |
| Tgfb1   | 0.963246221  | 0.12627356 | 2.38E-14 | 2.32E-12 | ENSMUSG00000002603 |
| Tgfb1i1 | 0.711227107  | 0.1779636  | 6.43E-05 | 7.08E-04 | ENSMUSG00000030782 |
| Tgfb3   | 0.451617199  | 0.17354211 | 9.26E-03 | 3.87E-02 | ENSMUSG00000021253 |
| Tgif1   | -0.903884739 | 0.15994037 | 1.59E-08 | 5.32E-07 | ENSMUSG00000047407 |
| Tgoln1  | -0.789335569 | 0.15722397 | 5.15E-07 | 1.13E-05 | ENSMUSG00000056429 |
| Tgs1    | -1.082132536 | 0.32841182 | 9.84E-04 | 6.52E-03 | ENSMUSG00000028233 |
| Thbd    | -0.612838899 | 0.21553388 | 4.46E-03 | 2.18E-02 | ENSMUSG00000074743 |
| Thbs1   | 0.724834667  | 0.18272016 | 7.28E-05 | 7.81E-04 | ENSMUSG00000040152 |
| Thbs2   | 0.628073692  | 0.19063561 | 9.86E-04 | 6.52E-03 | ENSMUSG00000023885 |
| Thbs4   | 0.899744835  | 0.15994598 | 1.85E-08 | 6.12E-07 | ENSMUSG00000021702 |
| Thnsl2  | 0.976807991  | 0.29559456 | 9.51E-04 | 6.36E-03 | ENSMUSG00000054474 |
| Thoc1   | -1.215048944 | 0.30138581 | 5.54E-05 | 6.25E-04 | ENSMUSG00000024287 |
| Thoc6   | 0.729843113  | 0.2037686  | 3.41E-04 | 2.74E-03 | ENSMUSG00000041319 |
| Thoc7   | -0.422362713 | 0.15243293 | 5.59E-03 | 2.62E-02 | ENSMUSG00000053453 |
| Thra    | 0.522266914  | 0.11998373 | 1.34E-05 | 1.88E-04 | ENSMUSG00000058756 |
| Thrsp   | 1.502719305  | 0.33643707 | 7.95E-06 | 1.19E-04 | ENSMUSG00000035686 |
| Thsd4   | 2.284924753  | 0.51419581 | 8.84E-06 | 1.31E-04 | ENSMUSG00000032289 |
| Thumpd1 | -0.704504205 | 0.24650211 | 4.26E-03 | 2.10E-02 | ENSMUSG00000030942 |
| Thy1    | 0.786511491  | 0.1461908  | 7.45E-08 | 2.06E-06 | ENSMUSG00000032011 |
| Thyn1   | -0.399824676 | 0.15216284 | 8.60E-03 | 3.66E-02 | ENSMUSG00000035443 |
| Tial1   | -0.95561719  | 0.18098257 | 1.29E-07 | 3.33E-06 | ENSMUSG00000030846 |
| Tigar   | -0.726176822 | 0.28273796 | 1.02E-02 | 4.19E-02 | ENSMUSG00000038028 |
| Tigd2   | -0.679378207 | 0.18334734 | 2.11E-04 | 1.84E-03 | ENSMUSG00000049232 |
| Tigd5   | -0.682845856 | 0.17598678 | 1.04E-04 | 1.03E-03 | ENSMUSG00000103558 |
| Timm10  | -0.590945234 | 0.14191886 | 3.13E-05 | 3.84E-04 | ENSMUSG00000027076 |
| Timm22  | 0.560168739  | 0.17829408 | 1.68E-03 | 1.00E-02 | ENSMUSG00000020843 |



|          |              |            |          |          |                    |
|----------|--------------|------------|----------|----------|--------------------|
| Timp1    | 0.516004012  | 0.09672361 | 9.56E-08 | 2.53E-06 | ENSMUSG00000001131 |
| Timp2    | 0.686193465  | 0.11641042 | 3.76E-09 | 1.45E-07 | ENSMUSG00000017466 |
| Timp3    | 0.564570758  | 0.11846657 | 1.88E-06 | 3.53E-05 | ENSMUSG00000020044 |
| Timp4    | 1.02304261   | 0.18115532 | 1.63E-08 | 5.43E-07 | ENSMUSG00000030317 |
| Tiprl    | -0.670576579 | 0.17461733 | 1.23E-04 | 1.18E-03 | ENSMUSG00000040843 |
| Tk1      | 1.126081502  | 0.26334802 | 1.90E-05 | 2.53E-04 | ENSMUSG00000025574 |
| Tkt      | -0.442143179 | 0.15326982 | 3.92E-03 | 1.97E-02 | ENSMUSG00000021957 |
| Tlcd1    | 0.583161626  | 0.19533309 | 2.83E-03 | 1.51E-02 | ENSMUSG00000019437 |
| Tlcd2    | 0.641301057  | 0.14362699 | 8.01E-06 | 1.20E-04 | ENSMUSG00000038217 |
| Tle2     | 1.559530021  | 0.53844674 | 3.78E-03 | 1.90E-02 | ENSMUSG00000034771 |
| Tlk2     | -1.073078103 | 0.2092514  | 2.93E-07 | 6.77E-06 | ENSMUSG00000020694 |
| Tln1     | 0.616385702  | 0.11760762 | 1.60E-07 | 3.99E-06 | ENSMUSG00000028465 |
| Tln2     | 0.734786342  | 0.17281396 | 2.12E-05 | 2.77E-04 | ENSMUSG00000052698 |
| Tlr4     | -1.079644765 | 0.26750352 | 5.44E-05 | 6.15E-04 | ENSMUSG00000039005 |
| Tm2d2    | 0.461660083  | 0.12972947 | 3.73E-04 | 2.94E-03 | ENSMUSG00000031556 |
| Tma16    | -1.125685029 | 0.41725007 | 6.98E-03 | 3.12E-02 | ENSMUSG00000025591 |
| Tmbim4   | 0.380761043  | 0.11836619 | 1.30E-03 | 8.15E-03 | ENSMUSG00000020225 |
| Tmed1    | 0.608340079  | 0.16936496 | 3.28E-04 | 2.66E-03 | ENSMUSG00000032180 |
| Tmed2    | -0.465365998 | 0.13666738 | 6.61E-04 | 4.72E-03 | ENSMUSG00000029390 |
| Tmed5    | -1.198985471 | 0.28375455 | 2.38E-05 | 3.05E-04 | ENSMUSG00000063406 |
| Tmeff1   | -1.158157239 | 0.29298943 | 7.72E-05 | 8.16E-04 | ENSMUSG00000028347 |
| Tmem100  | 1.303269109  | 0.28995583 | 6.97E-06 | 1.07E-04 | ENSMUSG00000069763 |
| Tmem104  | 1.049598294  | 0.22928328 | 4.70E-06 | 7.69E-05 | ENSMUSG00000045980 |
| Tmem109  | 0.520640192  | 0.12299185 | 2.30E-05 | 2.96E-04 | ENSMUSG00000034659 |
| Tmem11   | -0.79182258  | 0.13640987 | 6.45E-09 | 2.35E-07 | ENSMUSG00000043284 |
| Tmem119  | 2.757364627  | 0.13862939 | 4.95E-88 | 3.26E-84 | ENSMUSG00000054675 |
| Tmem123  | -0.363106704 | 0.14129363 | 1.02E-02 | 4.17E-02 | ENSMUSG00000050912 |
| Tmem127  | 0.823057241  | 0.16218397 | 3.88E-07 | 8.71E-06 | ENSMUSG00000034850 |
| Tmem132a | 0.882843965  | 0.32120305 | 5.99E-03 | 2.76E-02 | ENSMUSG00000024736 |
| Tmem143  | 0.914038491  | 0.24051225 | 1.44E-04 | 1.35E-03 | ENSMUSG00000002781 |
| Tmem147  | 0.273425063  | 0.10748348 | 1.10E-02 | 4.42E-02 | ENSMUSG00000006315 |
| Tmem14a  | 1.311989584  | 0.32576269 | 5.64E-05 | 6.33E-04 | ENSMUSG00000025933 |
| Tmem150a | 0.750283297  | 0.14046192 | 9.22E-08 | 2.45E-06 | ENSMUSG00000055912 |
| Tmem158  | 0.917840701  | 0.21711157 | 2.36E-05 | 3.02E-04 | ENSMUSG00000054871 |
| Tmem159  | -0.367896646 | 0.14707402 | 1.24E-02 | 4.84E-02 | ENSMUSG00000030917 |
| Tmem160  | 0.361214297  | 0.12526097 | 3.93E-03 | 1.97E-02 | ENSMUSG00000019158 |
| Tmem167  | -0.495769628 | 0.11811537 | 2.70E-05 | 3.39E-04 | ENSMUSG00000012422 |
| Tmem173  | 0.638738436  | 0.23434632 | 6.42E-03 | 2.91E-02 | ENSMUSG00000024349 |
| Tmem175  | 1.016421837  | 0.21698911 | 2.81E-06 | 4.97E-05 | ENSMUSG00000013495 |
| Tmem19   | 0.662977598  | 0.18536466 | 3.48E-04 | 2.78E-03 | ENSMUSG00000069520 |
| Tmem198b | 1.016969322  | 0.22663211 | 7.21E-06 | 1.10E-04 | ENSMUSG00000047090 |
| Tmem200c | 0.700517012  | 0.25009786 | 5.09E-03 | 2.43E-02 | ENSMUSG00000095041 |
| Tmem205  | 0.361835431  | 0.14322965 | 1.15E-02 | 4.59E-02 | ENSMUSG00000040883 |

|            |              |            |          |          |                    |
|------------|--------------|------------|----------|----------|--------------------|
| Tmem208    | 0.435604294  | 0.14109814 | 2.02E-03 | 1.15E-02 | ENSMUSG00000014856 |
| Tmem219    | 0.504059537  | 0.14988248 | 7.71E-04 | 5.39E-03 | ENSMUSG00000060538 |
| Tmem220    | 1.761552292  | 0.53885189 | 1.08E-03 | 7.03E-03 | ENSMUSG00000050270 |
| Tmem229b   | 1.296134999  | 0.31916002 | 4.88E-05 | 5.59E-04 | ENSMUSG00000046157 |
| Tmem238    | 0.732742791  | 0.23096971 | 1.51E-03 | 9.18E-03 | ENSMUSG00000030431 |
| Tmem245    | -0.763133503 | 0.28284961 | 6.98E-03 | 3.12E-02 | ENSMUSG00000055296 |
| Tmem246    | 1.842564861  | 0.44786346 | 3.89E-05 | 4.62E-04 | ENSMUSG00000039611 |
| Tmem248    | -0.310452026 | 0.12052686 | 1.00E-02 | 4.12E-02 | ENSMUSG00000053094 |
| Tmem250-ps | 0.594318008  | 0.16866079 | 4.25E-04 | 3.29E-03 | ENSMUSG00000087679 |
| Tmem259    | 0.486581566  | 0.15060373 | 1.23E-03 | 7.87E-03 | ENSMUSG00000013858 |
| Tmem263    | -0.564315244 | 0.20223658 | 5.26E-03 | 2.49E-02 | ENSMUSG00000060935 |
| Tmem33     | -0.367072326 | 0.12709388 | 3.87E-03 | 1.95E-02 | ENSMUSG00000037720 |
| Tmem38b    | -0.613649796 | 0.18727905 | 1.05E-03 | 6.87E-03 | ENSMUSG00000028420 |
| Tmem42     | 1.540174919  | 0.24807756 | 5.35E-10 | 2.61E-08 | ENSMUSG00000066233 |
| Tmem45a    | 0.565100384  | 0.12709173 | 8.73E-06 | 1.29E-04 | ENSMUSG00000022754 |
| Tmem47     | -1.067798194 | 0.27265302 | 8.99E-05 | 9.20E-04 | ENSMUSG00000025666 |
| Tmem59     | 0.413168373  | 0.10094    | 4.25E-05 | 5.01E-04 | ENSMUSG00000028618 |
| Tmem63b    | 0.58902105   | 0.16376872 | 3.22E-04 | 2.62E-03 | ENSMUSG00000036026 |
| Tmem70     | -0.432764467 | 0.14048146 | 2.07E-03 | 1.17E-02 | ENSMUSG00000025940 |
| Tmem8      | 1.98127534   | 0.28487458 | 3.53E-12 | 2.64E-10 | ENSMUSG00000024180 |
| Tmem86a    | 1.294202838  | 0.22776759 | 1.33E-08 | 4.57E-07 | ENSMUSG00000010307 |
| Tmem87b    | -0.831695092 | 0.2159443  | 1.17E-04 | 1.14E-03 | ENSMUSG00000014353 |
| Tmem98     | 0.496622116  | 0.1760854  | 4.80E-03 | 2.32E-02 | ENSMUSG00000035413 |
| Tmem9b     | 0.610822149  | 0.14368714 | 2.13E-05 | 2.77E-04 | ENSMUSG00000031021 |
| Tmf1       | -0.68266918  | 0.24952816 | 6.22E-03 | 2.84E-02 | ENSMUSG00000030059 |
| Tmpo       | -0.652275654 | 0.20640023 | 1.58E-03 | 9.48E-03 | ENSMUSG00000019961 |
| Tmsb4x     | 0.709950412  | 0.11745547 | 1.50E-09 | 6.39E-08 | ENSMUSG00000049775 |
| Tnc        | 1.962599377  | 0.39472974 | 6.63E-07 | 1.40E-05 | ENSMUSG00000028364 |
| Tnfrsf12a  | -0.779497866 | 0.24242389 | 1.30E-03 | 8.18E-03 | ENSMUSG00000023905 |
| Tnfsf12    | -1.170684879 | 0.3747782  | 1.79E-03 | 1.05E-02 | ENSMUSG00000097277 |
| Tnks       | -0.601000039 | 0.22467102 | 7.47E-03 | 3.28E-02 | ENSMUSG00000031529 |
| Tnks2      | -0.561326295 | 0.18609163 | 2.56E-03 | 1.40E-02 | ENSMUSG00000024811 |
| Tnn        | 0.710973233  | 0.19845798 | 3.40E-04 | 2.73E-03 | ENSMUSG00000026725 |
| Tnpo1      | -0.773843523 | 0.23554271 | 1.02E-03 | 6.70E-03 | ENSMUSG00000009470 |
| Tnpo3      | -0.727091124 | 0.17306077 | 2.65E-05 | 3.34E-04 | ENSMUSG00000012535 |
| Tnrc6a     | -0.423929531 | 0.15294329 | 5.57E-03 | 2.61E-02 | ENSMUSG00000052707 |
| Tnrc6b     | -0.848519519 | 0.29147798 | 3.60E-03 | 1.84E-02 | ENSMUSG00000047888 |
| Tns1       | 0.964990126  | 0.13295989 | 3.94E-13 | 3.45E-11 | ENSMUSG00000055322 |
| Tns2       | 0.675157277  | 0.1716591  | 8.38E-05 | 8.70E-04 | ENSMUSG00000037003 |
| Tns3       | 0.489037282  | 0.13167113 | 2.04E-04 | 1.79E-03 | ENSMUSG00000020422 |
| Togaram1   | -1.451377731 | 0.25447865 | 1.17E-08 | 4.12E-07 | ENSMUSG00000035614 |
| Tom1l2     | 0.641284694  | 0.14596309 | 1.12E-05 | 1.59E-04 | ENSMUSG00000000538 |
| Tom20      | 1.728883791  | 0.52273478 | 9.42E-04 | 6.32E-03 | ENSMUSG00000093424 |

|          |              |            |          |          |                    |
|----------|--------------|------------|----------|----------|--------------------|
| Tomm7    | -0.43826706  | 0.11445607 | 1.29E-04 | 1.23E-03 | ENSMUSG00000028998 |
| Tomm70a  | -0.662941408 | 0.16858172 | 8.41E-05 | 8.72E-04 | ENSMUSG00000022752 |
| Top2b    | -0.754275329 | 0.17968946 | 2.70E-05 | 3.39E-04 | ENSMUSG00000017485 |
| Topors   | -1.249141286 | 0.26998056 | 3.71E-06 | 6.30E-05 | ENSMUSG00000036822 |
| Tor1aip1 | 0.865667801  | 0.22060253 | 8.71E-05 | 8.97E-04 | ENSMUSG00000026466 |
| Tpcn1    | 0.964547636  | 0.18584729 | 2.10E-07 | 5.06E-06 | ENSMUSG00000032741 |
| Tpcn2    | 1.212652581  | 0.30291524 | 6.25E-05 | 6.92E-04 | ENSMUSG00000048677 |
| Tpd52    | -1.203576355 | 0.22218484 | 6.06E-08 | 1.70E-06 | ENSMUSG00000027506 |
| Tpgs1    | 0.561278633  | 0.14872095 | 1.61E-04 | 1.47E-03 | ENSMUSG00000020308 |
| Tpi1     | 0.619972006  | 0.10741711 | 7.85E-09 | 2.84E-07 | ENSMUSG00000023456 |
| Tpm1     | 0.393578856  | 0.09895089 | 6.96E-05 | 7.52E-04 | ENSMUSG00000032366 |
| Tpm4     | -0.336270702 | 0.12580874 | 7.52E-03 | 3.30E-02 | ENSMUSG00000031799 |
| Tpp2     | -0.711822547 | 0.26964763 | 8.29E-03 | 3.55E-02 | ENSMUSG00000041763 |
| Tpr      | -0.93721217  | 0.23166592 | 5.22E-05 | 5.94E-04 | ENSMUSG00000006005 |
| Tpst1    | 1.05790761   | 0.16730121 | 2.56E-10 | 1.34E-08 | ENSMUSG00000034118 |
| Tpst2    | 0.879634142  | 0.13396329 | 5.16E-11 | 3.23E-09 | ENSMUSG00000029344 |
| Tpt1     | -0.626522433 | 0.22316996 | 4.99E-03 | 2.39E-02 | ENSMUSG00000060126 |
| Tra2a    | -0.650988415 | 0.17597222 | 2.16E-04 | 1.88E-03 | ENSMUSG00000029817 |
| Tra2b    | -1.270420343 | 0.18640777 | 9.41E-12 | 6.62E-10 | ENSMUSG00000022858 |
| Trabd2b  | 1.652948291  | 0.14076538 | 7.71E-32 | 4.83E-29 | ENSMUSG00000070867 |
| Tradd    | 0.442931033  | 0.16841815 | 8.54E-03 | 3.63E-02 | ENSMUSG00000031887 |
| Trafd1   | 0.807142332  | 0.18863222 | 1.88E-05 | 2.50E-04 | ENSMUSG00000042726 |
| Tram2    | 0.870931598  | 0.19255458 | 6.10E-06 | 9.58E-05 | ENSMUSG00000041779 |
| Trappc1  | 0.356442459  | 0.1387003  | 1.02E-02 | 4.17E-02 | ENSMUSG00000049299 |
| Trappc3  | 0.384051299  | 0.11577233 | 9.09E-04 | 6.15E-03 | ENSMUSG00000028847 |
| Trappc6a | 0.469089681  | 0.12932192 | 2.86E-04 | 2.36E-03 | ENSMUSG00000002043 |
| Trappc9  | 0.975287315  | 0.25035108 | 9.79E-05 | 9.88E-04 | ENSMUSG00000047921 |
| Trdc     | 2.009149064  | 0.69860863 | 4.03E-03 | 2.00E-02 | ENSMUSG00000104686 |
| Tref1    | -0.680048636 | 0.24608643 | 5.72E-03 | 2.67E-02 | ENSMUSG00000064043 |
| Trim2    | -0.420992547 | 0.15540331 | 6.75E-03 | 3.03E-02 | ENSMUSG00000027993 |
| Trim24   | -1.036767443 | 0.28374186 | 2.58E-04 | 2.18E-03 | ENSMUSG00000029833 |
| Trim27   | -0.393503001 | 0.13549006 | 3.68E-03 | 1.87E-02 | ENSMUSG00000021326 |
| Trim33   | -0.874562997 | 0.32650192 | 7.39E-03 | 3.27E-02 | ENSMUSG00000033014 |
| Trim37   | -0.903521131 | 0.27448438 | 9.96E-04 | 6.58E-03 | ENSMUSG00000018548 |
| Trim44   | -0.679975183 | 0.20410866 | 8.64E-04 | 5.91E-03 | ENSMUSG00000027189 |
| Trim47   | 0.453024076  | 0.15094452 | 2.69E-03 | 1.46E-02 | ENSMUSG00000020773 |
| Trim56   | -0.958143763 | 0.27159865 | 4.19E-04 | 3.25E-03 | ENSMUSG00000043279 |
| Trim63   | -1.745248461 | 0.27720018 | 3.05E-10 | 1.57E-08 | ENSMUSG00000028834 |
| Trim65   | 1.908154668  | 0.67311373 | 4.59E-03 | 2.23E-02 | ENSMUSG00000054517 |
| Triobp   | 0.650875086  | 0.18955753 | 5.96E-04 | 4.32E-03 | ENSMUSG00000033088 |
| Trip12   | -0.611063129 | 0.16451598 | 2.04E-04 | 1.79E-03 | ENSMUSG00000026219 |
| Trir     | 0.404605786  | 0.10511813 | 1.19E-04 | 1.15E-03 | ENSMUSG00000041203 |
| Trmt1    | -0.364942199 | 0.13826648 | 8.31E-03 | 3.56E-02 | ENSMUSG00000001909 |

|           |              |            |          |          |                     |
|-----------|--------------|------------|----------|----------|---------------------|
| Trmt10a   | -1.013577026 | 0.26671318 | 1.45E-04 | 1.35E-03 | ENSMUSG00000004127  |
| Trmt10c   | -1.551004595 | 0.41611042 | 1.93E-04 | 1.72E-03 | ENSMUSG000000044763 |
| Trmt12    | 1.400473156  | 0.41832397 | 8.15E-04 | 5.62E-03 | ENSMUSG000000037085 |
| Trmt13    | -1.484686315 | 0.53290316 | 5.34E-03 | 2.52E-02 | ENSMUSG000000033439 |
| Trnp1     | 0.556764538  | 0.14614396 | 1.39E-04 | 1.31E-03 | ENSMUSG000000056596 |
| Trmt1     | -1.454234722 | 0.56799267 | 1.05E-02 | 4.26E-02 | ENSMUSG000000013736 |
| Trp53inp1 | -0.797764014 | 0.1447571  | 3.57E-08 | 1.08E-06 | ENSMUSG000000028211 |
| Trp53inp2 | 0.592553593  | 0.15435642 | 1.24E-04 | 1.19E-03 | ENSMUSG000000038375 |
| Trpm4     | 1.213917211  | 0.3308989  | 2.44E-04 | 2.08E-03 | ENSMUSG000000038260 |
| Trpv4     | 0.782675187  | 0.24482992 | 1.39E-03 | 8.58E-03 | ENSMUSG000000014158 |
| Tsc22d2   | -1.081196353 | 0.22013393 | 9.04E-07 | 1.85E-05 | ENSMUSG000000027806 |
| Tsc22d3   | -0.318525259 | 0.122974   | 9.59E-03 | 3.99E-02 | ENSMUSG000000031431 |
| Tsc22d4   | 0.691591802  | 0.18136812 | 1.37E-04 | 1.30E-03 | ENSMUSG000000029723 |
| Tsen34    | 0.793061653  | 0.1624607  | 1.05E-06 | 2.12E-05 | ENSMUSG000000035585 |
| Tspan11   | 1.231628468  | 0.28932249 | 2.07E-05 | 2.71E-04 | ENSMUSG000000030351 |
| Tspan13   | 0.680890506  | 0.21572624 | 1.60E-03 | 9.59E-03 | ENSMUSG000000020577 |
| Tspan14   | 0.6460647    | 0.20043749 | 1.27E-03 | 8.01E-03 | ENSMUSG000000037824 |
| Tspan17   | 1.189939039  | 0.1540449  | 1.12E-14 | 1.15E-12 | ENSMUSG000000025875 |
| Tspan18   | 1.343240046  | 0.30292194 | 9.24E-06 | 1.35E-04 | ENSMUSG000000027217 |
| Tspan3    | 0.369151016  | 0.12583144 | 3.35E-03 | 1.73E-02 | ENSMUSG000000032324 |
| Tspan4    | 0.65923779   | 0.11134852 | 3.21E-09 | 1.27E-07 | ENSMUSG000000025511 |
| Tspan6    | 0.487979514  | 0.1451926  | 7.77E-04 | 5.42E-03 | ENSMUSG000000067377 |
| Tspan9    | 0.518225902  | 0.15087022 | 5.93E-04 | 4.31E-03 | ENSMUSG000000030352 |
| Tsr1      | -0.846589422 | 0.18846089 | 7.05E-06 | 1.08E-04 | ENSMUSG000000038335 |
| Ttc1      | -0.378701366 | 0.14191629 | 7.62E-03 | 3.33E-02 | ENSMUSG000000041278 |
| Ttc17     | -0.726919587 | 0.24521815 | 3.03E-03 | 1.60E-02 | ENSMUSG000000027194 |
| Ttc28     | 0.476987289  | 0.18637739 | 1.05E-02 | 4.27E-02 | ENSMUSG000000033209 |
| Ttc3      | -1.056734838 | 0.21078319 | 5.35E-07 | 1.16E-05 | ENSMUSG000000040785 |
| Ttc30b    | 2.096568238  | 0.71862519 | 3.53E-03 | 1.81E-02 | ENSMUSG000000075273 |
| Ttc38     | 0.884754149  | 0.35337988 | 1.23E-02 | 4.82E-02 | ENSMUSG000000035944 |
| Ttl       | -0.563415745 | 0.20707755 | 6.51E-03 | 2.95E-02 | ENSMUSG000000027394 |
| Ttyh2     | 1.264831917  | 0.34564581 | 2.53E-04 | 2.13E-03 | ENSMUSG000000034714 |
| Ttyh3     | 0.985103244  | 0.24926604 | 7.75E-05 | 8.19E-04 | ENSMUSG000000036565 |
| Tuba1a    | 1.057672995  | 0.12334719 | 9.93E-18 | 1.44E-15 | ENSMUSG000000072235 |
| Tuba1b    | 0.867073214  | 0.14066668 | 7.09E-10 | 3.35E-08 | ENSMUSG000000023004 |
| Tuba1c    | 1.193032065  | 0.15857559 | 5.34E-14 | 5.05E-12 | ENSMUSG000000043091 |
| Tuba4a    | 0.353711346  | 0.13051208 | 6.72E-03 | 3.03E-02 | ENSMUSG000000026202 |
| Tubb2a    | 0.449716135  | 0.12426504 | 2.96E-04 | 2.43E-03 | ENSMUSG000000058672 |
| Tubb4b    | 0.656515987  | 0.15699147 | 2.89E-05 | 3.59E-04 | ENSMUSG000000036752 |
| Tubb5     | 0.277066903  | 0.11041884 | 1.21E-02 | 4.77E-02 | ENSMUSG000000001525 |
| Tubb6     | 0.946535667  | 0.12996971 | 3.27E-13 | 2.89E-11 | ENSMUSG000000001473 |
| Subg2     | 1.025273518  | 0.28782737 | 3.68E-04 | 2.91E-03 | ENSMUSG000000045007 |
| Subgcp4   | -0.558746947 | 0.20581093 | 6.63E-03 | 2.99E-02 | ENSMUSG000000027263 |

|         |              |            |          |          |                     |
|---------|--------------|------------|----------|----------|---------------------|
| Tuft1   | -1.168951185 | 0.3847345  | 2.38E-03 | 1.32E-02 | ENSMUSG00000005968  |
| Tulp3   | 0.384057177  | 0.14366099 | 7.51E-03 | 3.30E-02 | ENSMUSG00000001521  |
| Tusc3   | 0.501089954  | 0.17113076 | 3.41E-03 | 1.76E-02 | ENSMUSG000000039530 |
| Tut7    | -0.836808482 | 0.20784111 | 5.67E-05 | 6.36E-04 | ENSMUSG000000035248 |
| Tvp23b  | -0.551298838 | 0.16069146 | 6.02E-04 | 4.36E-03 | ENSMUSG000000014177 |
| Twf2    | 0.636613587  | 0.19750746 | 1.27E-03 | 8.01E-03 | ENSMUSG000000023277 |
| Twist2  | 0.797029506  | 0.25239609 | 1.59E-03 | 9.54E-03 | ENSMUSG000000007805 |
| Twistnb | -1.037940144 | 0.26146363 | 7.20E-05 | 7.73E-04 | ENSMUSG000000020561 |
| Txn1    | -0.540767421 | 0.10442783 | 2.24E-07 | 5.36E-06 | ENSMUSG000000028367 |
| Txndc12 | -0.734930631 | 0.11328288 | 8.72E-11 | 5.08E-09 | ENSMUSG000000028567 |
| Txndc15 | 0.577019826  | 0.16149371 | 3.53E-04 | 2.81E-03 | ENSMUSG000000021497 |
| Txndc5  | 0.3828893    | 0.11691155 | 1.06E-03 | 6.90E-03 | ENSMUSG000000038991 |
| Txndc9  | -0.328627427 | 0.12926113 | 1.10E-02 | 4.44E-02 | ENSMUSG000000058407 |
| Txnip   | -0.758775242 | 0.13156069 | 8.05E-09 | 2.90E-07 | ENSMUSG000000038393 |
| Txn11   | -0.446802445 | 0.13685527 | 1.10E-03 | 7.12E-03 | ENSMUSG000000024583 |
| Txnrd1  | -0.936099889 | 0.12716173 | 1.82E-13 | 1.65E-11 | ENSMUSG000000020250 |
| Txnrd2  | 0.712730952  | 0.26426619 | 7.00E-03 | 3.13E-02 | ENSMUSG000000075704 |
| Tyk2    | 0.664908832  | 0.23833742 | 5.27E-03 | 2.50E-02 | ENSMUSG000000032175 |
| U2af2   | 0.458682597  | 0.13768441 | 8.64E-04 | 5.91E-03 | ENSMUSG000000030435 |
| U2surp  | -1.210810692 | 0.27625051 | 1.17E-05 | 1.66E-04 | ENSMUSG000000032407 |
| Uap111  | 0.495357384  | 0.18353521 | 6.96E-03 | 3.12E-02 | ENSMUSG000000026956 |
| Uba3    | -1.242590682 | 0.26051387 | 1.84E-06 | 3.47E-05 | ENSMUSG000000030061 |
| Uba5    | -0.958991878 | 0.1777382  | 6.83E-08 | 1.91E-06 | ENSMUSG000000032557 |
| Uba6    | -0.812421543 | 0.28458965 | 4.31E-03 | 2.12E-02 | ENSMUSG000000035898 |
| Ube2b   | -0.350382284 | 0.11965839 | 3.41E-03 | 1.76E-02 | ENSMUSG000000020390 |
| Ube2d3  | -0.699893164 | 0.12321516 | 1.34E-08 | 4.61E-07 | ENSMUSG000000078578 |
| Ube2f   | -0.407363156 | 0.13832115 | 3.23E-03 | 1.68E-02 | ENSMUSG000000034343 |
| Ube2m   | 0.421481942  | 0.13913121 | 2.45E-03 | 1.35E-02 | ENSMUSG000000005575 |
| Ube2ql1 | -1.03051561  | 0.34493118 | 2.81E-03 | 1.50E-02 | ENSMUSG000000052981 |
| Ube2w   | -0.516319701 | 0.18219204 | 4.60E-03 | 2.24E-02 | ENSMUSG000000025939 |
| Ube3a   | -0.705462331 | 0.2058144  | 6.09E-04 | 4.40E-03 | ENSMUSG000000025326 |
| Ube3b   | 0.635434427  | 0.15363052 | 3.53E-05 | 4.25E-04 | ENSMUSG000000029577 |
| Ube4b   | -0.528660795 | 0.13323702 | 7.25E-05 | 7.78E-04 | ENSMUSG000000028960 |
| Ubqln1  | -0.441994717 | 0.12751992 | 5.28E-04 | 3.92E-03 | ENSMUSG000000005312 |
| Ubr2    | -0.660601857 | 0.16550541 | 6.57E-05 | 7.17E-04 | ENSMUSG000000023977 |
| Ubr5    | -0.715287704 | 0.21426014 | 8.43E-04 | 5.78E-03 | ENSMUSG000000037487 |
| Ubtd1   | -0.462793211 | 0.18458715 | 1.22E-02 | 4.79E-02 | ENSMUSG000000025171 |
| Ubtf    | 0.826961754  | 0.21929408 | 1.63E-04 | 1.48E-03 | ENSMUSG000000020923 |
| Ubxn2a  | -1.052473786 | 0.39455709 | 7.64E-03 | 3.34E-02 | ENSMUSG000000020634 |
| Ubxn4   | -0.787596796 | 0.16171513 | 1.11E-06 | 2.22E-05 | ENSMUSG000000026353 |
| Ubxn7   | -0.790781502 | 0.2689638  | 3.28E-03 | 1.70E-02 | ENSMUSG000000053774 |
| Ubxn8   | 0.99924687   | 0.25796758 | 1.07E-04 | 1.06E-03 | ENSMUSG000000052906 |
| Uchl5   | -1.148942193 | 0.28502847 | 5.55E-05 | 6.26E-04 | ENSMUSG000000018189 |

|           |              |            |          |          |                    |
|-----------|--------------|------------|----------|----------|--------------------|
| Uck2      | -0.408327601 | 0.12776734 | 1.39E-03 | 8.60E-03 | ENSMUSG00000026558 |
| Ucma      | 0.452305428  | 0.15917719 | 4.49E-03 | 2.19E-02 | ENSMUSG00000026668 |
| Ucp2      | 1.434257675  | 0.11108298 | 3.87E-38 | 4.25E-35 | ENSMUSG00000033685 |
| Ugcg      | -0.990710989 | 0.24866927 | 6.78E-05 | 7.36E-04 | ENSMUSG00000028381 |
| Uhmk1     | -0.642181896 | 0.20705689 | 1.93E-03 | 1.11E-02 | ENSMUSG00000026667 |
| Uhrf1     | 1.483949151  | 0.56774917 | 8.96E-03 | 3.78E-02 | ENSMUSG00000001228 |
| Uhrf1bp1l | -1.184383038 | 0.28952227 | 4.30E-05 | 5.05E-04 | ENSMUSG00000019951 |
| Uhrf2     | -0.710730395 | 0.14936531 | 1.95E-06 | 3.64E-05 | ENSMUSG00000024817 |
| Uimc1     | -0.861211089 | 0.22100005 | 9.74E-05 | 9.84E-04 | ENSMUSG00000025878 |
| Unc13a    | 3.317016271  | 1.00158611 | 9.27E-04 | 6.26E-03 | ENSMUSG00000034799 |
| Unc45a    | 0.445338227  | 0.1765226  | 1.16E-02 | 4.63E-02 | ENSMUSG00000030533 |
| Unc93b1   | 0.568610372  | 0.16101202 | 4.13E-04 | 3.21E-03 | ENSMUSG00000036908 |
| Upf2      | -1.058274175 | 0.28026926 | 1.59E-04 | 1.46E-03 | ENSMUSG00000043241 |
| Upf3b     | -1.202625044 | 0.31824671 | 1.58E-04 | 1.45E-03 | ENSMUSG00000036572 |
| Uqcr11    | 0.43519116   | 0.11218645 | 1.05E-04 | 1.04E-03 | ENSMUSG00000020163 |
| Uqcrc1    | 0.390708702  | 0.12494284 | 1.77E-03 | 1.04E-02 | ENSMUSG00000025651 |
| Uri1      | -0.874156761 | 0.21071292 | 3.35E-05 | 4.08E-04 | ENSMUSG00000030421 |
| Urm1      | 0.39340552   | 0.14035518 | 5.06E-03 | 2.42E-02 | ENSMUSG00000069020 |
| Urod      | 0.392336084  | 0.12403968 | 1.56E-03 | 9.40E-03 | ENSMUSG00000028684 |
| Usf3      | -0.982917944 | 0.36526647 | 7.12E-03 | 3.17E-02 | ENSMUSG00000068284 |
| Uso1      | -0.894877897 | 0.25313357 | 4.07E-04 | 3.17E-03 | ENSMUSG00000029407 |
| Usp14     | -0.57951216  | 0.17999646 | 1.28E-03 | 8.09E-03 | ENSMUSG00000047879 |
| Usp15     | -1.214221553 | 0.37301957 | 1.13E-03 | 7.34E-03 | ENSMUSG00000020124 |
| Usp16     | -0.986468819 | 0.23692789 | 3.13E-05 | 3.85E-04 | ENSMUSG00000025616 |
| Usp2      | 0.481568627  | 0.18556287 | 9.45E-03 | 3.94E-02 | ENSMUSG00000032010 |
| Usp20     | 0.577902141  | 0.21798916 | 8.02E-03 | 3.47E-02 | ENSMUSG00000026854 |
| Usp25     | -0.735061367 | 0.25807611 | 4.40E-03 | 2.16E-02 | ENSMUSG00000022867 |
| Usp3      | -0.644462087 | 0.17459847 | 2.23E-04 | 1.93E-03 | ENSMUSG00000032376 |
| Usp33     | -1.040379433 | 0.36139367 | 3.99E-03 | 1.99E-02 | ENSMUSG00000025437 |
| Usp34     | -0.774813975 | 0.24467309 | 1.54E-03 | 9.33E-03 | ENSMUSG00000056342 |
| Usp39     | -0.432961961 | 0.13930589 | 1.88E-03 | 1.09E-02 | ENSMUSG00000056305 |
| Usp4      | 0.492173508  | 0.17549722 | 5.04E-03 | 2.41E-02 | ENSMUSG00000032612 |
| Usp47     | -0.955562648 | 0.28867735 | 9.32E-04 | 6.28E-03 | ENSMUSG00000059263 |
| Usp48     | -0.526477156 | 0.18265584 | 3.95E-03 | 1.98E-02 | ENSMUSG00000043411 |
| Usp7      | -0.652309828 | 0.19738645 | 9.51E-04 | 6.36E-03 | ENSMUSG00000022710 |
| Usp8      | -0.655414804 | 0.24535762 | 7.56E-03 | 3.31E-02 | ENSMUSG00000027363 |
| Utp11     | -0.675615882 | 0.11905167 | 1.39E-08 | 4.74E-07 | ENSMUSG00000028907 |
| Utp14a    | -1.030107404 | 0.37206818 | 5.63E-03 | 2.63E-02 | ENSMUSG00000063785 |
| Utp18     | -0.78504631  | 0.26813014 | 3.41E-03 | 1.76E-02 | ENSMUSG00000054079 |
| Utp3      | -0.50300396  | 0.1625562  | 1.97E-03 | 1.13E-02 | ENSMUSG00000070697 |
| Uvssa     | -1.127456327 | 0.3598225  | 1.73E-03 | 1.02E-02 | ENSMUSG00000037355 |
| Vamp2     | 0.625114339  | 0.18694569 | 8.26E-04 | 5.68E-03 | ENSMUSG00000020894 |
| Vamp4     | -0.640660472 | 0.16948379 | 1.57E-04 | 1.44E-03 | ENSMUSG00000026696 |

|        |              |            |          |          |                     |
|--------|--------------|------------|----------|----------|---------------------|
| Vamp8  | 0.521835959  | 0.11491774 | 5.60E-06 | 8.88E-05 | ENSMUSG00000050732  |
| Vapa   | -0.522748778 | 0.1147035  | 5.18E-06 | 8.30E-05 | ENSMUSG00000024091  |
| Vasn   | 1.071115505  | 0.12123592 | 1.00E-18 | 1.67E-16 | ENSMUSG00000039646  |
| Vasp   | 0.477655818  | 0.14353334 | 8.75E-04 | 5.96E-03 | ENSMUSG00000030403  |
| Vav2   | 0.972203012  | 0.34608283 | 4.97E-03 | 2.39E-02 | ENSMUSG00000009621  |
| Vbp1   | -0.913017384 | 0.25045703 | 2.67E-04 | 2.23E-03 | ENSMUSG00000031197  |
| Vcam1  | 0.782069656  | 0.23106831 | 7.13E-04 | 5.03E-03 | ENSMUSG00000027962  |
| Vdac3  | -0.46495852  | 0.16951628 | 6.09E-03 | 2.79E-02 | ENSMUSG00000008892  |
| Vdr    | 1.873657483  | 0.20916352 | 3.31E-19 | 5.81E-17 | ENSMUSG00000022479  |
| Vegfd  | 0.656019803  | 0.21350948 | 2.12E-03 | 1.20E-02 | ENSMUSG00000031380  |
| VeZF1  | -0.600323459 | 0.21350855 | 4.93E-03 | 2.37E-02 | ENSMUSG00000018377  |
| Vit    | 1.589543686  | 0.26689572 | 2.59E-09 | 1.04E-07 | ENSMUSG00000024076  |
| Vkorc1 | -1.764910171 | 0.28607139 | 6.85E-10 | 3.26E-08 | ENSMUSG00000096001  |
| Vmac   | 0.734933759  | 0.27824767 | 8.26E-03 | 3.54E-02 | ENSMUSG00000054723  |
| Vmp1   | -0.48750489  | 0.12855003 | 1.49E-04 | 1.39E-03 | ENSMUSG00000018171  |
| Vps13a | -1.765994433 | 0.38648534 | 4.89E-06 | 7.94E-05 | ENSMUSG00000046230  |
| Vps13d | -0.753758408 | 0.28162067 | 7.44E-03 | 3.28E-02 | ENSMUSG00000020220  |
| Vps26a | -0.66342672  | 0.20131806 | 9.83E-04 | 6.52E-03 | ENSMUSG00000020078  |
| Vps28  | -0.949077086 | 0.31437397 | 2.54E-03 | 1.39E-02 | ENSMUSG000000115604 |
| Vps35  | -1.086082171 | 0.19174538 | 1.48E-08 | 5.00E-07 | ENSMUSG00000031696  |
| Vps35l | 0.898002768  | 0.21242071 | 2.36E-05 | 3.02E-04 | ENSMUSG00000030982  |
| Vps37a | -0.803843531 | 0.17153099 | 2.78E-06 | 4.94E-05 | ENSMUSG00000031600  |
| Vps37b | -0.576855567 | 0.21686893 | 7.82E-03 | 3.40E-02 | ENSMUSG00000066278  |
| Vps4b  | -0.539870454 | 0.18467589 | 3.46E-03 | 1.78E-02 | ENSMUSG00000009907  |
| Vps50  | -0.877693934 | 0.34367807 | 1.07E-02 | 4.33E-02 | ENSMUSG00000001376  |
| Vps52  | 0.941585538  | 0.18878134 | 6.11E-07 | 1.31E-05 | ENSMUSG00000024319  |
| Vps53  | 0.620697092  | 0.1909273  | 1.15E-03 | 7.43E-03 | ENSMUSG00000017288  |
| Vps9d1 | 0.762267714  | 0.28530542 | 7.55E-03 | 3.31E-02 | ENSMUSG00000001062  |
| Vstm4  | 1.397244577  | 0.38434742 | 2.78E-04 | 2.31E-03 | ENSMUSG00000050666  |
| Wac    | -1.009467626 | 0.28833152 | 4.63E-04 | 3.53E-03 | ENSMUSG00000024283  |
| Wapl   | -0.752544205 | 0.29100076 | 9.71E-03 | 4.03E-02 | ENSMUSG00000041408  |
| Washc2 | -0.685396561 | 0.22805803 | 2.65E-03 | 1.44E-02 | ENSMUSG00000024104  |
| Washc3 | 0.483429762  | 0.12897604 | 1.78E-04 | 1.60E-03 | ENSMUSG00000020056  |
| Washc4 | -1.227111626 | 0.28822032 | 2.07E-05 | 2.71E-04 | ENSMUSG00000034560  |
| Wasl   | -0.782304183 | 0.23596517 | 9.15E-04 | 6.19E-03 | ENSMUSG00000029684  |
| Wbp1   | 0.459777531  | 0.14366191 | 1.37E-03 | 8.51E-03 | ENSMUSG00000030035  |
| Wbp1l  | 0.544552911  | 0.15570785 | 4.70E-04 | 3.57E-03 | ENSMUSG00000047731  |
| Wbp4   | -0.61356195  | 0.2375749  | 9.81E-03 | 4.05E-02 | ENSMUSG00000022023  |
| Wdr27  | 1.068225562  | 0.27748827 | 1.18E-04 | 1.15E-03 | ENSMUSG00000046991  |
| Wdr3   | -0.612241678 | 0.22199553 | 5.82E-03 | 2.70E-02 | ENSMUSG00000033285  |
| Wdr4   | -0.618642653 | 0.22842061 | 6.76E-03 | 3.04E-02 | ENSMUSG00000024037  |
| Wdr43  | -0.938907989 | 0.16382838 | 9.98E-09 | 3.55E-07 | ENSMUSG00000041057  |
| Wdr6   | 0.966659901  | 0.15053111 | 1.35E-10 | 7.46E-09 | ENSMUSG00000066357  |

|           |              |            |          |          |                    |
|-----------|--------------|------------|----------|----------|--------------------|
| Wdr60     | -1.596426539 | 0.33065543 | 1.38E-06 | 2.67E-05 | ENSMUSG00000042050 |
| Wdr75     | -1.075180361 | 0.28609298 | 1.71E-04 | 1.55E-03 | ENSMUSG00000025995 |
| Wdr81     | 0.862280254  | 0.25005282 | 5.64E-04 | 4.14E-03 | ENSMUSG00000045374 |
| Wdr89     | -0.467834734 | 0.17753798 | 8.41E-03 | 3.59E-02 | ENSMUSG00000045690 |
| Wfs1      | 0.711385102  | 0.2701923  | 8.47E-03 | 3.61E-02 | ENSMUSG00000039474 |
| Wif1      | 1.305876588  | 0.16582195 | 3.40E-15 | 3.73E-13 | ENSMUSG00000020218 |
| Wnk1      | -0.749434596 | 0.17561902 | 1.98E-05 | 2.62E-04 | ENSMUSG00000045962 |
| Wnk4      | 1.07480165   | 0.29635126 | 2.87E-04 | 2.37E-03 | ENSMUSG00000035112 |
| Wnt4      | 0.930586284  | 0.20678422 | 6.79E-06 | 1.05E-04 | ENSMUSG00000036856 |
| Wnt5a     | 0.636756776  | 0.25121331 | 1.13E-02 | 4.50E-02 | ENSMUSG00000021994 |
| Wnt6      | 2.44014649   | 0.67400741 | 2.94E-04 | 2.42E-03 | ENSMUSG00000033227 |
| Wrap53    | 0.880828469  | 0.29369371 | 2.71E-03 | 1.46E-02 | ENSMUSG00000041346 |
| Wwtr1     | -0.487513691 | 0.12174229 | 6.22E-05 | 6.89E-04 | ENSMUSG00000027803 |
| Xpo1      | -0.969760215 | 0.17673066 | 4.08E-08 | 1.21E-06 | ENSMUSG00000020290 |
| Xpo7      | -0.516272849 | 0.15866509 | 1.14E-03 | 7.37E-03 | ENSMUSG00000022100 |
| Xrn2      | -0.95245432  | 0.18743469 | 3.74E-07 | 8.43E-06 | ENSMUSG00000027433 |
| Xylt2     | 0.879578631  | 0.28524576 | 2.05E-03 | 1.17E-02 | ENSMUSG00000020868 |
| Yars      | -0.408402615 | 0.13304466 | 2.14E-03 | 1.21E-02 | ENSMUSG00000028811 |
| Ybx1      | -0.358149049 | 0.12049166 | 2.95E-03 | 1.57E-02 | ENSMUSG00000028639 |
| Ybx3      | -0.506026993 | 0.10320765 | 9.44E-07 | 1.93E-05 | ENSMUSG00000030189 |
| Yipf1     | 0.411786332  | 0.14402047 | 4.25E-03 | 2.10E-02 | ENSMUSG00000057375 |
| Yipf2     | 0.869504153  | 0.23745373 | 2.50E-04 | 2.12E-03 | ENSMUSG00000032182 |
| Yipf5     | -0.614822582 | 0.11260027 | 4.76E-08 | 1.38E-06 | ENSMUSG00000024487 |
| Yme1l1    | -1.056712611 | 0.25081122 | 2.52E-05 | 3.19E-04 | ENSMUSG00000026775 |
| Ypel5     | -0.365033234 | 0.11750884 | 1.89E-03 | 1.10E-02 | ENSMUSG00000039770 |
| Ythdc1    | -0.889747435 | 0.24026778 | 2.13E-04 | 1.85E-03 | ENSMUSG00000035851 |
| Ythdf3    | -0.662275052 | 0.19953115 | 9.03E-04 | 6.12E-03 | ENSMUSG00000047213 |
| Ywhae     | -0.515565777 | 0.10048233 | 2.88E-07 | 6.71E-06 | ENSMUSG00000020849 |
| Zadh2     | -0.700612945 | 0.19754299 | 3.90E-04 | 3.06E-03 | ENSMUSG00000049090 |
| Zbtb11    | -1.524495508 | 0.28017571 | 5.29E-08 | 1.52E-06 | ENSMUSG00000022601 |
| Zbtb11os1 | -1.090116063 | 0.41725835 | 8.99E-03 | 3.78E-02 | ENSMUSG00000101609 |
| Zbtb20    | -0.537273247 | 0.19790269 | 6.63E-03 | 2.99E-02 | ENSMUSG00000022708 |
| Zbtb22    | 0.692538522  | 0.2719888  | 1.09E-02 | 4.40E-02 | ENSMUSG00000051390 |
| Zbtb38    | -0.673109486 | 0.22448152 | 2.71E-03 | 1.46E-02 | ENSMUSG00000040433 |
| Zbtb44    | -0.675227711 | 0.23976284 | 4.86E-03 | 2.34E-02 | ENSMUSG00000047412 |
| Zbtb8os   | 0.677397155  | 0.21849282 | 1.93E-03 | 1.11E-02 | ENSMUSG00000057572 |
| Zc2hc1a   | -0.639144963 | 0.22356436 | 4.25E-03 | 2.10E-02 | ENSMUSG00000043542 |
| Zc3h13    | -0.751283475 | 0.23101434 | 1.15E-03 | 7.41E-03 | ENSMUSG00000022000 |
| Zc3h15    | -1.092627502 | 0.21099356 | 2.24E-07 | 5.36E-06 | ENSMUSG00000027091 |
| Zc3h6     | -0.984224139 | 0.36107354 | 6.41E-03 | 2.91E-02 | ENSMUSG00000042851 |
| Zcchc17   | 0.334199285  | 0.13370882 | 1.24E-02 | 4.87E-02 | ENSMUSG00000028772 |
| Zcchc24   | 0.420769344  | 0.12509255 | 7.69E-04 | 5.38E-03 | ENSMUSG00000055538 |
| Zcchc7    | -0.863157932 | 0.33242311 | 9.42E-03 | 3.93E-02 | ENSMUSG00000035649 |



|         |              |            |          |          |                    |
|---------|--------------|------------|----------|----------|--------------------|
| Zcchc9  | -0.752193471 | 0.23450647 | 1.34E-03 | 8.34E-03 | ENSMUSG00000021621 |
| Zcrb1   | -0.551729108 | 0.11700535 | 2.41E-06 | 4.36E-05 | ENSMUSG00000022635 |
| Zdhhc12 | 0.557532906  | 0.16748557 | 8.72E-04 | 5.95E-03 | ENSMUSG00000015335 |
| Zdhhc20 | -0.885920332 | 0.20450292 | 1.48E-05 | 2.03E-04 | ENSMUSG00000021969 |
| Zdhhc3  | 0.487233363  | 0.17533864 | 5.46E-03 | 2.56E-02 | ENSMUSG00000025786 |
| Zdhhc5  | 0.505125809  | 0.17621106 | 4.15E-03 | 2.06E-02 | ENSMUSG00000034075 |
| Zeb1    | -0.814879775 | 0.19478189 | 2.87E-05 | 3.57E-04 | ENSMUSG00000024238 |
| Zer1    | 0.663582575  | 0.22361748 | 3.00E-03 | 1.59E-02 | ENSMUSG00000039686 |
| Zfand5  | -0.910975969 | 0.17308994 | 1.42E-07 | 3.59E-06 | ENSMUSG00000024750 |
| Zfand6  | -0.528619927 | 0.14981467 | 4.18E-04 | 3.24E-03 | ENSMUSG00000030629 |
| Zfas1   | -1.548531619 | 0.12687742 | 2.93E-34 | 2.14E-31 | ENSMUSG00000074578 |
| Zfc3h1  | -0.860413163 | 0.27578256 | 1.81E-03 | 1.06E-02 | ENSMUSG00000034163 |
| Zfp106  | -0.576713403 | 0.19601795 | 3.26E-03 | 1.70E-02 | ENSMUSG00000027288 |
| Zfp110  | -0.879588752 | 0.25840375 | 6.64E-04 | 4.73E-03 | ENSMUSG00000058638 |
| Zfp120  | -0.989242055 | 0.32556643 | 2.38E-03 | 1.32E-02 | ENSMUSG00000068134 |
| Zfp131  | -0.666037298 | 0.18362676 | 2.87E-04 | 2.36E-03 | ENSMUSG00000094483 |
| Zfp148  | -0.722898191 | 0.26103044 | 5.62E-03 | 2.63E-02 | ENSMUSG00000022811 |
| Zfp160  | -0.973864253 | 0.36708942 | 7.98E-03 | 3.45E-02 | ENSMUSG00000067942 |
| Zfp260  | -0.83439728  | 0.2100942  | 7.14E-05 | 7.69E-04 | ENSMUSG00000049421 |
| Zfp266  | -0.699439504 | 0.27058158 | 9.74E-03 | 4.03E-02 | ENSMUSG00000060510 |
| Zfp292  | -0.803288393 | 0.24328033 | 9.60E-04 | 6.40E-03 | ENSMUSG00000039967 |
| Zfp317  | -1.000809206 | 0.36166492 | 5.65E-03 | 2.64E-02 | ENSMUSG00000057551 |
| Zfp324  | 1.105108047  | 0.4111291  | 7.19E-03 | 3.19E-02 | ENSMUSG00000004500 |
| Zfp326  | -0.760178114 | 0.2770944  | 6.08E-03 | 2.79E-02 | ENSMUSG00000029290 |
| Zfp330  | -1.102773502 | 0.19648338 | 1.99E-08 | 6.51E-07 | ENSMUSG00000031711 |
| Zfp354a | -2.497161219 | 0.97163467 | 1.02E-02 | 4.17E-02 | ENSMUSG00000020364 |
| Zfp354c | -0.949626573 | 0.28619393 | 9.06E-04 | 6.14E-03 | ENSMUSG00000044807 |
| Zfp358  | 0.629982308  | 0.19775973 | 1.44E-03 | 8.87E-03 | ENSMUSG00000047264 |
| Zfp362  | 0.691629909  | 0.20894144 | 9.32E-04 | 6.28E-03 | ENSMUSG00000028799 |
| Zfp367  | -1.530598334 | 0.48806908 | 1.71E-03 | 1.01E-02 | ENSMUSG00000044934 |
| Zfp386  | -0.863080568 | 0.27745961 | 1.87E-03 | 1.09E-02 | ENSMUSG00000042063 |
| Zfp395  | 1.511341753  | 0.24803805 | 1.11E-09 | 4.86E-08 | ENSMUSG00000034522 |
| Zfp397  | -1.73207955  | 0.36677343 | 2.33E-06 | 4.24E-05 | ENSMUSG00000024276 |
| Zfp414  | 1.177107236  | 0.25982848 | 5.89E-06 | 9.28E-05 | ENSMUSG00000073423 |
| Zfp420  | -1.459499933 | 0.55656235 | 8.73E-03 | 3.70E-02 | ENSMUSG00000058402 |
| Zfp445  | -1.453409938 | 0.34110718 | 2.04E-05 | 2.69E-04 | ENSMUSG00000047036 |
| Zfp451  | -0.698786936 | 0.25835911 | 6.84E-03 | 3.07E-02 | ENSMUSG00000042197 |
| Zfp467  | 0.730082528  | 0.20489926 | 3.66E-04 | 2.90E-03 | ENSMUSG00000068551 |
| Zfp503  | 0.574922537  | 0.17281992 | 8.79E-04 | 5.98E-03 | ENSMUSG00000039081 |
| Zfp51   | -1.298803158 | 0.38695231 | 7.89E-04 | 5.49E-03 | ENSMUSG00000023892 |
| Zfp511  | -0.574949543 | 0.18702069 | 2.11E-03 | 1.20E-02 | ENSMUSG00000025470 |
| Zfp512b | 0.932506147  | 0.2701167  | 5.56E-04 | 4.09E-03 | ENSMUSG00000000823 |
| Zfp580  | 1.112987204  | 0.2252111  | 7.73E-07 | 1.62E-05 | ENSMUSG00000055633 |

|               |              |            |          |          |                    |
|---------------|--------------|------------|----------|----------|--------------------|
| Zfp607a       | -1.650425259 | 0.64684834 | 1.07E-02 | 4.35E-02 | ENSMUSG00000020420 |
| Zfp62         | -1.330032269 | 0.51045    | 9.17E-03 | 3.85E-02 | ENSMUSG00000046311 |
| Zfp68         | -1.536325777 | 0.35052572 | 1.17E-05 | 1.66E-04 | ENSMUSG00000058291 |
| Zfp703        | 1.236142955  | 0.13602723 | 1.01E-19 | 1.91E-17 | ENSMUSG00000085795 |
| Zfp715        | -0.927258566 | 0.34792797 | 7.70E-03 | 3.36E-02 | ENSMUSG00000012640 |
| Zfp758        | -1.754131647 | 0.69796365 | 1.20E-02 | 4.73E-02 | ENSMUSG00000044501 |
| Zfp771        | 0.456945837  | 0.16579738 | 5.85E-03 | 2.71E-02 | ENSMUSG00000054716 |
| Zfp780b       | -1.219767215 | 0.48896598 | 1.26E-02 | 4.91E-02 | ENSMUSG00000063047 |
| Zfp800        | -1.049409608 | 0.35301074 | 2.95E-03 | 1.57E-02 | ENSMUSG00000039841 |
| Zfp809        | -0.792751619 | 0.28438843 | 5.31E-03 | 2.51E-02 | ENSMUSG00000057982 |
| Zfp81         | -1.566541073 | 0.51213444 | 2.22E-03 | 1.25E-02 | ENSMUSG00000003929 |
| Zfp850        | 1.349787701  | 0.42270773 | 1.41E-03 | 8.66E-03 | ENSMUSG00000096727 |
| Zfp874a       | -1.904555249 | 0.55496283 | 5.99E-04 | 4.35E-03 | ENSMUSG00000069206 |
| Zfp9          | -1.211309243 | 0.30664017 | 7.81E-05 | 8.24E-04 | ENSMUSG00000072623 |
| Zfp91         | -0.423905494 | 0.15729663 | 7.04E-03 | 3.14E-02 | ENSMUSG00000024695 |
| Zfp930        | -1.722481432 | 0.45562511 | 1.57E-04 | 1.44E-03 | ENSMUSG00000059897 |
| Zfp958        | -2.082625515 | 0.31839124 | 6.11E-11 | 3.70E-09 | ENSMUSG00000058748 |
| Zfr           | -0.66187345  | 0.15224813 | 1.38E-05 | 1.92E-04 | ENSMUSG00000022201 |
| Zhx3          | 0.926206905  | 0.19771009 | 2.80E-06 | 4.96E-05 | ENSMUSG00000035877 |
| Zmat3         | -0.368175764 | 0.13474378 | 6.29E-03 | 2.87E-02 | ENSMUSG00000027663 |
| Zmat5         | 0.501768485  | 0.14504681 | 5.41E-04 | 4.01E-03 | ENSMUSG00000009076 |
| Zmym2         | -0.75538299  | 0.2075347  | 2.73E-04 | 2.28E-03 | ENSMUSG00000021945 |
| Zmym5         | -0.940081639 | 0.30590265 | 2.12E-03 | 1.20E-02 | ENSMUSG00000040123 |
| Zmynd11       | -0.595326298 | 0.1935806  | 2.10E-03 | 1.19E-02 | ENSMUSG00000021156 |
| Zmynd19       | -0.692966764 | 0.22716885 | 2.29E-03 | 1.27E-02 | ENSMUSG00000026974 |
| Zmynd8        | 0.570680787  | 0.21225004 | 7.17E-03 | 3.19E-02 | ENSMUSG00000039671 |
| Znhit6        | -0.528317353 | 0.20916781 | 1.15E-02 | 4.59E-02 | ENSMUSG00000074182 |
| Znrf3         | 1.143346022  | 0.43414885 | 8.45E-03 | 3.60E-02 | ENSMUSG00000041961 |
| Zpr1          | -0.465252933 | 0.15005839 | 1.93E-03 | 1.11E-02 | ENSMUSG00000032078 |
| Zranb1        | -0.744512115 | 0.19618008 | 1.48E-04 | 1.37E-03 | ENSMUSG00000030967 |
| Zranb2        | -0.88701585  | 0.20815608 | 2.03E-05 | 2.68E-04 | ENSMUSG00000028180 |
| Zrsr1         | -0.857783172 | 0.23208835 | 2.19E-04 | 1.90E-03 | ENSMUSG00000044068 |
| Zrsr2         | -0.728147114 | 0.16022442 | 5.51E-06 | 8.75E-05 | ENSMUSG00000031370 |
| Zswim3        | 1.124316363  | 0.40538461 | 5.55E-03 | 2.60E-02 | ENSMUSG00000045822 |
| Zswim6        | -0.542062846 | 0.20239075 | 7.40E-03 | 3.27E-02 | ENSMUSG00000032846 |
| Zswim8        | 0.572131696  | 0.18453749 | 1.93E-03 | 1.11E-02 | ENSMUSG00000021819 |
| Zwint         | -0.445651749 | 0.13532832 | 9.91E-04 | 6.55E-03 | ENSMUSG00000019923 |
| Zzz3          | -1.326163174 | 0.34885384 | 1.44E-04 | 1.35E-03 | ENSMUSG00000039068 |
| 0610040B10Rik | 1.257069655  | 0.34572358 | 2.77E-04 | 2.31E-03 | ENSMUSG00000089889 |
| 1110019D14Rik | -0.768306799 | 0.30537762 | 1.19E-02 | 4.70E-02 | ENSMUSG00000097415 |
| 1110032A03Rik | 0.569671794  | 0.21516976 | 8.11E-03 | 3.49E-02 | ENSMUSG00000037971 |
| 1110038B12Rik | -0.669168641 | 0.12831873 | 1.84E-07 | 4.50E-06 | ENSMUSG00000092203 |
| 1110051M20Rik | 1.08692665   | 0.17614852 | 6.81E-10 | 3.26E-08 | ENSMUSG00000040591 |

|               |              |            |          |          |                     |
|---------------|--------------|------------|----------|----------|---------------------|
| 1500015O10Rik | 0.427728136  | 0.13791955 | 1.93E-03 | 1.11E-02 | ENSMUSG00000026051  |
| 1600014C10Rik | 0.885000957  | 0.21709291 | 4.57E-05 | 5.31E-04 | ENSMUSG00000054676  |
| 1700003E16Rik | 1.668727627  | 0.66420055 | 1.20E-02 | 4.74E-02 | ENSMUSG00000030030  |
| 1700021F05Rik | -0.793286258 | 0.19319281 | 4.02E-05 | 4.77E-04 | ENSMUSG00000019797  |
| 1700086O06Rik | 3.672936437  | 0.98339781 | 1.88E-04 | 1.68E-03 | ENSMUSG00000097059  |
| 1700088E04Rik | 0.848278141  | 0.33519914 | 1.14E-02 | 4.54E-02 | ENSMUSG00000033029  |
| 1700124L16Rik | -0.765228317 | 0.16037082 | 1.83E-06 | 3.45E-05 | ENSMUSG00000098492  |
| 1810010H24Rik | 3.477534803  | 0.85532783 | 4.79E-05 | 5.53E-04 | ENSMUSG00000078607  |
| 1810021B22Rik | 1.165000132  | 0.25593521 | 5.32E-06 | 8.49E-05 | ENSMUSG00000087331  |
| 1810022K09Rik | -0.574972489 | 0.14371899 | 6.32E-05 | 6.98E-04 | ENSMUSG00000078784  |
| 1810024B03Rik | 1.231649199  | 0.19817726 | 5.14E-10 | 2.52E-08 | ENSMUSG00000044145  |
| 1810032O08Rik | -1.822808706 | 0.27015477 | 1.51E-11 | 1.03E-09 | ENSMUSG00000020812  |
| 2010001A14Rik | 0.732209766  | 0.23636277 | 1.95E-03 | 1.12E-02 | ENSMUSG00000087165  |
| 2310009A05Rik | -1.053979287 | 0.29623487 | 3.74E-04 | 2.95E-03 | ENSMUSG00000098188  |
| 2310015A10Rik | -2.00806139  | 0.65696791 | 2.24E-03 | 1.25E-02 | ENSMUSG00000097637  |
| 2310022B05Rik | 0.672504093  | 0.10754359 | 4.02E-10 | 2.03E-08 | ENSMUSG00000031983  |
| 2310033P09Rik | 0.738826365  | 0.2421379  | 2.28E-03 | 1.27E-02 | ENSMUSG00000020441  |
| 2410006H16Rik | -1.08015586  | 0.13652028 | 2.53E-15 | 2.82E-13 | ENSMUSG00000086841  |
| 2410022M11Rik | 1.298329863  | 0.39712543 | 1.08E-03 | 7.03E-03 | ENSMUSG00000099966  |
| 2500002B13Rik | -5.685215683 | 1.06200192 | 8.64E-08 | 2.32E-06 | ENSMUSG00000096916  |
| 2510039O18Rik | 0.526779873  | 0.13374759 | 8.20E-05 | 8.55E-04 | ENSMUSG00000044496  |
| 2610008E11Rik | -1.114686431 | 0.33272382 | 8.08E-04 | 5.59E-03 | ENSMUSG00000060301  |
| 2610301B20Rik | -0.971430833 | 0.23134672 | 2.68E-05 | 3.37E-04 | ENSMUSG00000059482  |
| 2610528A11Rik | -0.543328756 | 0.14167729 | 1.26E-04 | 1.20E-03 | ENSMUSG00000095567  |
| 2700038G22Rik | 1.039899703  | 0.40442101 | 1.01E-02 | 4.16E-02 | ENSMUSG00000097113  |
| 2810001G20Rik | 1.069454588  | 0.23263423 | 4.28E-06 | 7.11E-05 | ENSMUSG00000087497  |
| 2810006K23Rik | 0.782523605  | 0.28155959 | 5.45E-03 | 2.56E-02 | ENSMUSG00000047635  |
| 2810402E24Rik | -2.28696825  | 0.89709645 | 1.08E-02 | 4.37E-02 | ENSMUSG00000099354  |
| 2900076A07Rik | -1.450523426 | 0.16230266 | 3.99E-19 | 6.83E-17 | ENSMUSG00000097195  |
| 3110070M22Rik | 1.872534412  | 0.4667877  | 6.03E-05 | 6.71E-04 | ENSMUSG00000074635  |
| 4921524J17Rik | -0.746498807 | 0.25563091 | 3.50E-03 | 1.80E-02 | ENSMUSG00000036934  |
| 4931428F04Rik | 1.032900424  | 0.3053712  | 7.18E-04 | 5.06E-03 | ENSMUSG00000014837  |
| 4932438A13Rik | -0.81522675  | 0.30284184 | 7.10E-03 | 3.16E-02 | ENSMUSG00000037270  |
| 4933404O12Rik | 0.683762672  | 0.2310251  | 3.08E-03 | 1.62E-02 | ENSMUSG00000097867  |
| 4933417D19Rik | 1.813321427  | 0.38666026 | 2.74E-06 | 4.87E-05 | ENSMUSG00000097616  |
| 5430416N02Rik | 2.437539046  | 0.56072497 | 1.38E-05 | 1.92E-04 | ENSMUSG00000097767  |
| 5730480H06Rik | 0.707074956  | 0.28311148 | 1.25E-02 | 4.89E-02 | ENSMUSG00000029089  |
| 5830448L01Rik | -0.895301067 | 0.28527116 | 1.70E-03 | 1.01E-02 | ENSMUSG000000114194 |
| 6330562C20Rik | -0.750437729 | 0.16478572 | 5.26E-06 | 8.43E-05 | ENSMUSG00000093314  |
| 6430548M08Rik | 1.222884035  | 0.41328514 | 3.09E-03 | 1.62E-02 | ENSMUSG00000031824  |
| 6720427I07Rik | 0.875196686  | 0.21387677 | 4.28E-05 | 5.03E-04 | ENSMUSG00000097328  |
| 6820431F20Rik | -2.265425062 | 0.72902943 | 1.89E-03 | 1.09E-02 | ENSMUSG00000071796  |
| 9130024F11Rik | 1.939121566  | 0.61128481 | 1.51E-03 | 9.19E-03 | ENSMUSG00000087022  |

|               |              |            |          |          |                    |
|---------------|--------------|------------|----------|----------|--------------------|
| 9530068E07Rik | 0.532159662  | 0.12259031 | 1.42E-05 | 1.97E-04 | ENSMUSG00000036275 |
| 9930012K11Rik | 2.142224523  | 0.70620348 | 2.42E-03 | 1.34E-02 | ENSMUSG00000044551 |
| 9930021J03Rik | -1.027872346 | 0.26778694 | 1.24E-04 | 1.19E-03 | ENSMUSG00000046138 |
